# Supplementary material for: Mesoscale spatiotemporal variability in a complex host-parasite system influenced by intermediate host body size
Source: PubMed Central journal article supplement (PMC5563442; doi:10.7717/peerj.3675), 2017-08-17
Supplement: peerj-05-3675-s003.pdf [file peerj-05-3675-s003.pdf]

*Supplementary material of the paper entitled. Only for reviewers.*

**Mesoscale spatiotemporal variability in a complex host-parasite system influenced by intermediate host body size**

Sara M. Rodríguez<sup>1,2</sup> & Nelson Valdivia<sup>2,3</sup>

<sup>1</sup>Programa de Doctorado en Biología Marina, Facultad de Ciencias, Universidad Austral de Chile, campus Isla Teja s/n, Valdivia, Chile.

<sup>2</sup>Instituto de Ciencias Marinas y Limnológicas, Facultad de Ciencias, Universidad Austral de Chile, campus Isla Teja s/n, Valdivia, Chile.

<sup>3</sup>Centro FONDAF de Investigación en Dinámica de Ecosistemas Marinos de Altas Latitudes (IDEAL).

Corresponding author:

Sara M. Rodríguez

Email addresses: [saramrodriz@gmail.com](mailto:saramrodriz@gmail.com)

### Prevalence vs. bird\*size

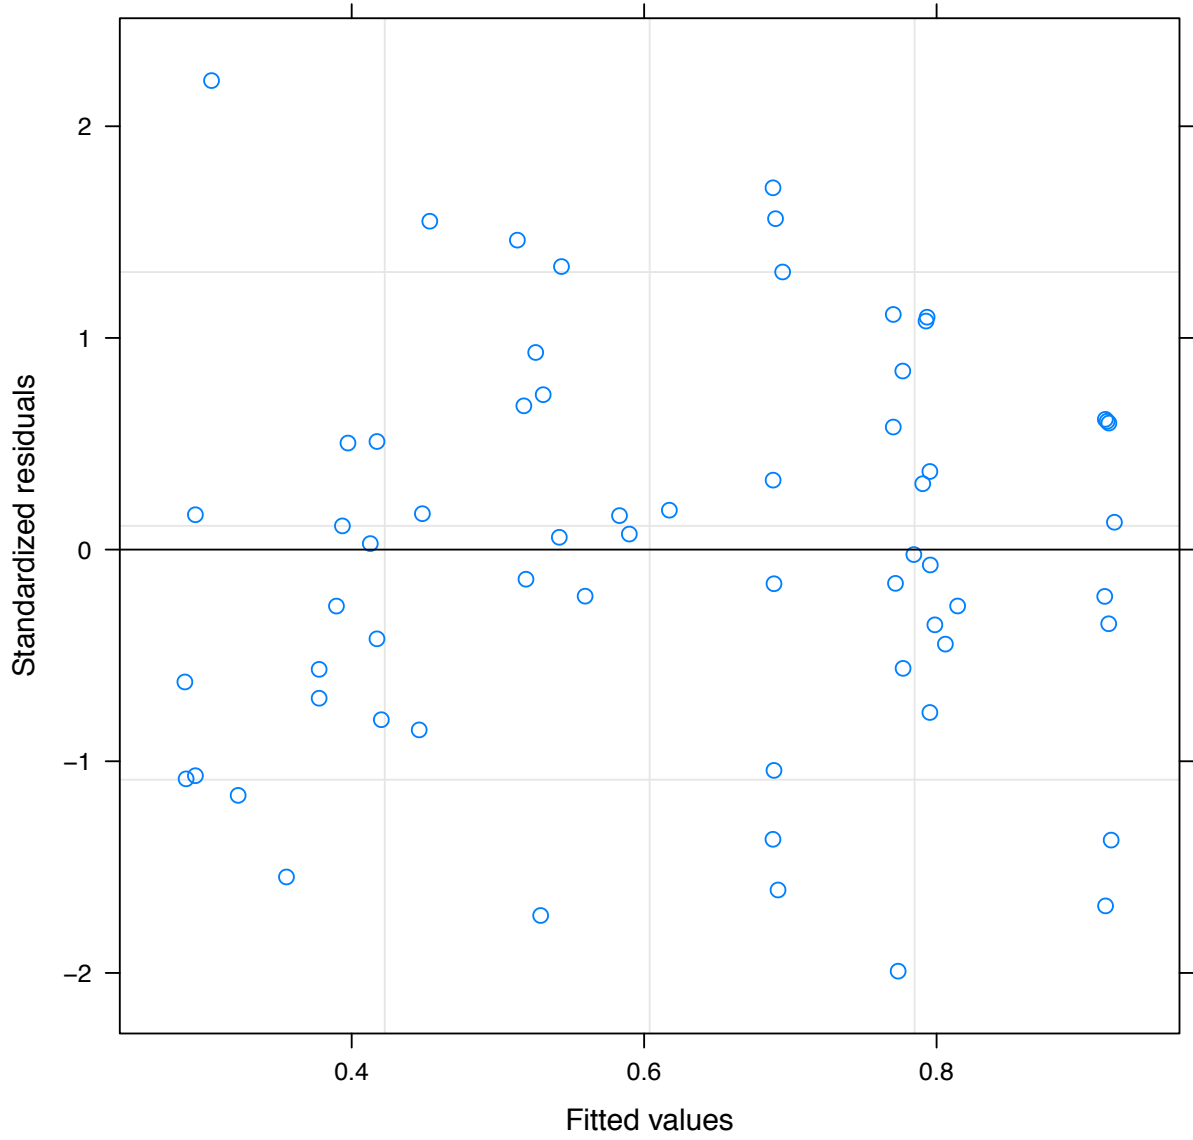

Fig. 1. Relationships between bird density and host size effects on prevalence of parasites.

### Prevalence vs. bird\*size

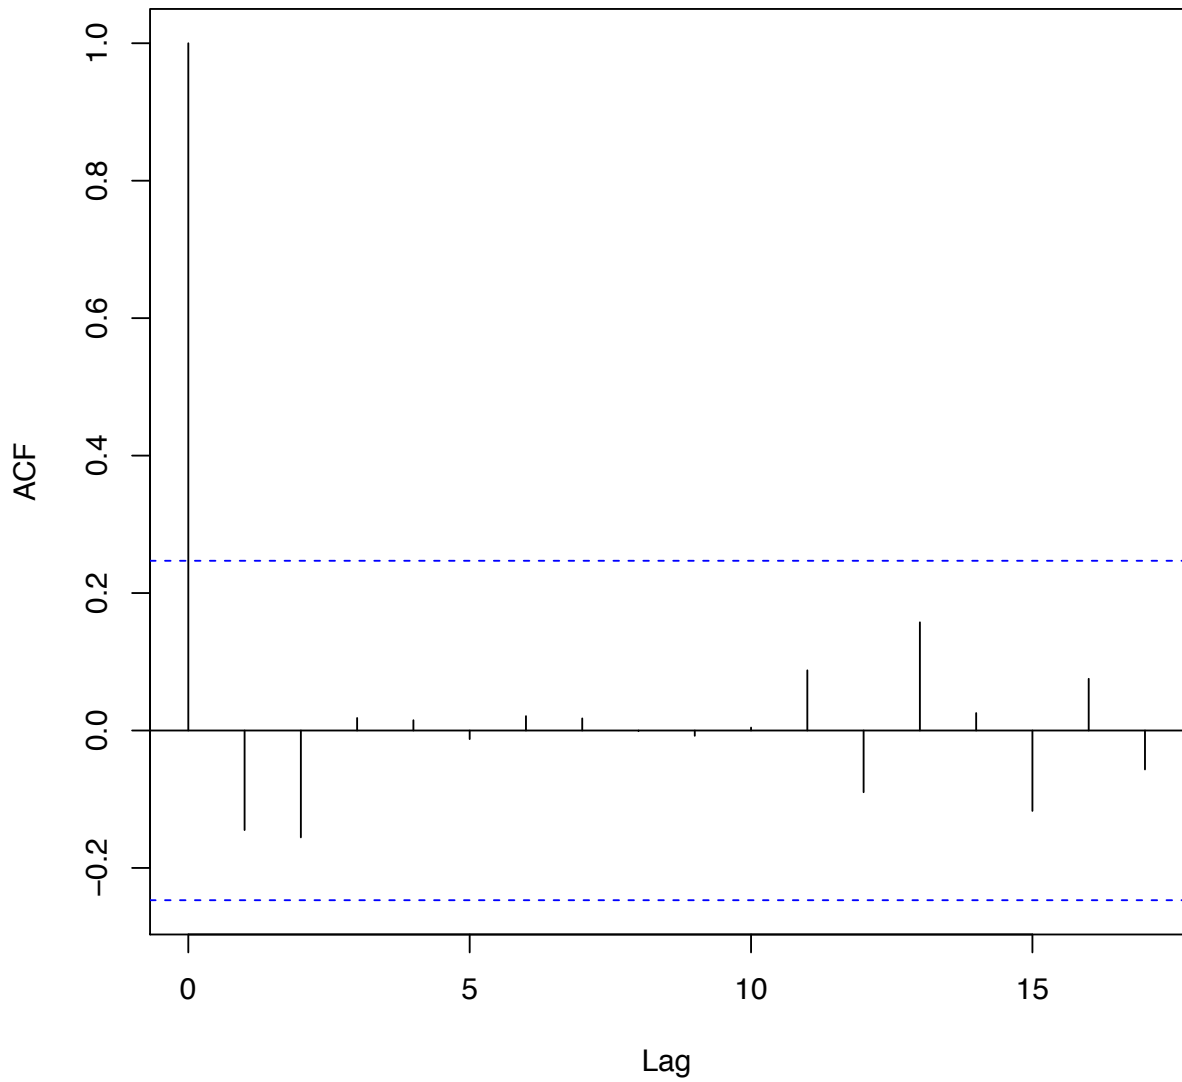

Fig. 2. Auto-correlation functions (ACF) between prevalence vs. bird density and host size across sites and over time.

### variance-to-mean ratio vs. bird\*size

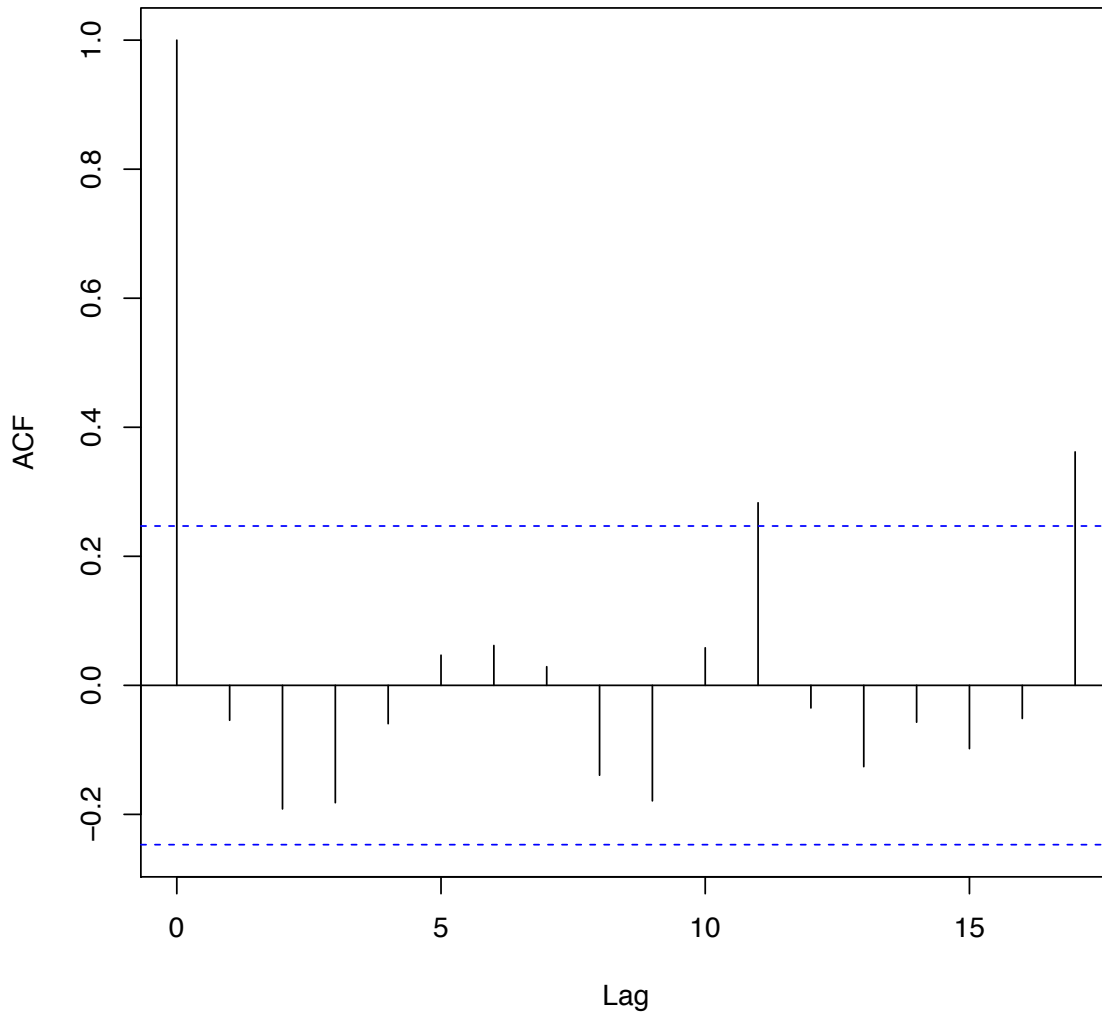

Fig. 3. Auto-correlation functions (ACF) between variance-to-mean-ratio vs. bird density and host size across sites and over time.
