# Supplementary material for: Mesoscale spatiotemporal variability in a complex host-parasite system influenced by intermediate host body size
Source: PeerJ. 2017 Aug 17;5:e3675. doi: 10.7717/peerj.3675 (PMC5563442; doi:10.7717/peerj.3675)
Supplement: Supplemental Information 2 — Dataset generated in this study. [file peerj-05-3675-s002.xls]

## Sheet: DATA
Number	Transect	Sites	LAT	LON	season	Sex	Weight(gr)	Size (mm)	N° P. altmani	Lado	Lamo	Lepi	Macu	abuaves	area (km2)	Ladoden	Lamoden	Lepiden	Macuden	densave	logsize	logalt	peop	dogs	cow	total
1	1	CALF	-39.79	-73.39	1	1	0.11	7.9	0	11	13	0	248	272	0.8	13.75	16.25	0	310	340	0.94939	0	2	0	0	2
2	1	CALF	-39.79	-73.39	1	1	0.26	10.5	0	11	13	0	248	272	0.8	13.75	16.25	0	310	340	1.0607	0	2	0	0	2
3	1	CALF	-39.79	-73.39	1	1	0.32	11.4	0	11	13	0	248	272	0.8	13.75	16.25	0	310	340	1.09342	0	2	0	0	2
4	1	CALF	-39.79	-73.39	1	1	0.34	11.1	1	11	13	0	248	272	0.8	13.75	16.25	0	310	340	1.08279	0.30103	2	0	0	2
5	1	CALF	-39.79	-73.39	1	1	0.34	11.1	2	11	13	0	248	272	0.8	13.75	16.25	0	310	340	1.08279	0.477121	2	0	0	2
6	1	CALF	-39.79	-73.39	1	1	0.31	11.8	0	11	13	0	248	272	0.8	13.75	16.25	0	310	340	1.10721	0	2	0	0	2
7	1	CALF	-39.79	-73.39	1	2	0.91	15.9	1	11	13	0	248	272	0.8	13.75	16.25	0	310	340	1.22789	0.30103	2	0	0	2
8	1	CALF	-39.79	-73.39	1	2	0.91	15.8	4	11	13	0	248	272	0.8	13.75	16.25	0	310	340	1.22531	0.69897	2	0	0	2
9	1	CALF	-39.79	-73.39	1	2	1.04	16.6	1	11	13	0	248	272	0.8	13.75	16.25	0	310	340	1.24551	0.30103	2	0	0	2
10	1	CALF	-39.79	-73.39	1	2	1.22	18.1	1	11	13	0	248	272	0.8	13.75	16.25	0	310	340	1.28103	0.30103	2	0	0	2
11	1	CALF	-39.79	-73.39	1	2	1.17	17.8	2	11	13	0	248	272	0.8	13.75	16.25	0	310	340	1.27416	0.477121	2	0	0	2
12	1	CALF	-39.79	-73.39	1	3	1.53	19.2	2	11	13	0	248	272	0.8	13.75	16.25	0	310	340	1.30535	0.477121	2	0	0	2
13	1	CALF	-39.79	-73.39	1	3	1.17	17.3	1	11	13	0	248	272	0.8	13.75	16.25	0	310	340	1.26245	0.30103	2	0	0	2
14	1	CALF	-39.79	-73.39	1	3	1.57	18.8	2	11	13	0	248	272	0.8	13.75	16.25	0	310	340	1.29667	0.477121	2	0	0	2
15	1	CALF	-39.79	-73.39	1	3	1.29	18.4	0	11	13	0	248	272	0.8	13.75	16.25	0	310	340	1.2878	0	2	0	0	2
16	1	CALF	-39.79	-73.39	1	3	3.05	22.9	1	11	13	0	248	272	0.8	13.75	16.25	0	310	340	1.3784	0.30103	2	0	0	2
17	1	CALF	-39.79	-73.39	1	3	3.06	23.7	4	11	13	0	248	272	0.8	13.75	16.25	0	310	340	1.3927	0.69897	2	0	0	2
18	2	CALF	-39.79	-73.39	1	1	0.33	11.3	0	11	13	0	248	272	0.8	13.75	16.25	0	310	340	1.08991	0	2	0	0	2
19	2	CALF	-39.79	-73.39	1	1	0.35	12	1	11	13	0	248	272	0.8	13.75	16.25	0	310	340	1.11394	0.30103	2	0	0	2
20	2	CALF	-39.79	-73.39	1	1	0.32	11.1	0	11	13	0	248	272	0.8	13.75	16.25	0	310	340	1.08279	0	2	0	0	2
21	2	CALF	-39.79	-73.39	1	1	0.39	12	2	11	13	0	248	272	0.8	13.75	16.25	0	310	340	1.11394	0.477121	2	0	0	2
22	2	CALF	-39.79	-73.39	1	1	0.39	12.4	0	11	13	0	248	272	0.8	13.75	16.25	0	310	340	1.1271	0	2	0	0	2
23	2	CALF	-39.79	-73.39	1	1	0.36	11	0	11	13	0	248	272	0.8	13.75	16.25	0	310	340	1.07918	0	2	0	0	2
24	2	CALF	-39.79	-73.39	1	1	0.35	11.4	0	11	13	0	248	272	0.8	13.75	16.25	0	310	340	1.09342	0	2	0	0	2
25	2	CALF	-39.79	-73.39	1	1	0.38	11.7	1	11	13	0	248	272	0.8	13.75	16.25	0	310	340	1.1038	0.30103	2	0	0	2
26	2	CALF	-39.79	-73.39	1	1	0.42	12.2	1	11	13	0	248	272	0.8	13.75	16.25	0	310	340	1.12057	0.30103	2	0	0	2
27	2	CALF	-39.79	-73.39	1	1	0.24	10.1	0	11	13	0	248	272	0.8	13.75	16.25	0	310	340	1.04532	0	2	0	0	2
28	2	CALF	-39.79	-73.39	1	1	0.26	10.8	0	11	13	0	248	272	0.8	13.75	16.25	0	310	340	1.07188	0	2	0	0	2
29	2	CALF	-39.79	-73.39	1	1	0.44	12.7	1	11	13	0	248	272	0.8	13.75	16.25	0	310	340	1.13672	0.30103	2	0	0	2
30	2	CALF	-39.79	-73.39	1	1	0.66	14.1	1	11	13	0	248	272	0.8	13.75	16.25	0	310	340	1.17898	0.30103	2	0	0	2
31	2	CALF	-39.79	-73.39	1	3	1.65	19.2	0	11	13	0	248	272	0.8	13.75	16.25	0	310	340	1.30535	0	2	0	0	2
32	2	CALF	-39.79	-73.39	1	3	1.75	19.4	0	11	13	0	248	272	0.8	13.75	16.25	0	310	340	1.30963	0	2	0	0	2
33	2	CALF	-39.79	-73.39	1	3	1.66	18.9	0	11	13	0	248	272	0.8	13.75	16.25	0	310	340	1.29885	0	2	0	0	2
34	2	CALF	-39.79	-73.39	1	3	1.51	19.2	0	11	13	0	248	272	0.8	13.75	16.25	0	310	340	1.30535	0	2	0	0	2
35	2	CALF	-39.79	-73.39	1	3	1.34	17.9	2	11	13	0	248	272	0.8	13.75	16.25	0	310	340	1.27646	0.477121	2	0	0	2
36	2	CALF	-39.79	-73.39	1	3	1.64	18.6	3	11	13	0	248	272	0.8	13.75	16.25	0	310	340	1.29226	0.60206	2	0	0	2
37	2	CALF	-39.79	-73.39	1	3	1	16.6	0	11	13	0	248	272	0.8	13.75	16.25	0	310	340	1.24551	0	2	0	0	2
38	2	CALF	-39.79	-73.39	1	3	1.79	20.1	0	11	13	0	248	272	0.8	13.75	16.25	0	310	340	1.32428	0	2	0	0	2
39	2	CALF	-39.79	-73.39	1	3	1.88	19.7	0	11	13	0	248	272	0.8	13.75	16.25	0	310	340	1.31597	0	2	0	0	2
40	2	CALF	-39.79	-73.39	1	2	1.67	19.7	2	11	13	0	248	272	0.8	13.75	16.25	0	310	340	1.31597	0.477121	2	0	0	2
41	2	CALF	-39.79	-73.39	1	3	1.41	18.6	2	11	13	0	248	272	0.8	13.75	16.25	0	310	340	1.29226	0.477121	2	0	0	2
42	2	CALF	-39.79	-73.39	1	3	1.98	20	1	11	13	0	248	272	0.8	13.75	16.25	0	310	340	1.32222	0.30103	2	0	0	2
43	2	CALF	-39.79	-73.39	1	3	2.83	22.2	2	11	13	0	248	272	0.8	13.75	16.25	0	310	340	1.36549	0.477121	2	0	0	2
44	2	CALF	-39.79	-73.39	1	3	3.45	23.3	1	11	13	0	248	272	0.8	13.75	16.25	0	310	340	1.38561	0.30103	2	0	0	2
45	3	CALF	-39.79	-73.39	1	1	0.31	11.6	0	11	13	0	248	272	0.8	13.75	16.25	0	310	340	1.10037	0	2	0	0	2
46	3	CALF	-39.79	-73.39	1	1	0.37	12.2	3	11	13	0	248	272	0.8	13.75	16.25	0	310	340	1.12057	0.60206	2	0	0	2
47	3	CALF	-39.79	-73.39	1	1	0.22	10	1	11	13	0	248	272	0.8	13.75	16.25	0	310	340	1.04139	0.30103	2	0	0	2
48	3	CALF	-39.79	-73.39	1	1	0.37	11.6	0	11	13	0	248	272	0.8	13.75	16.25	0	310	340	1.10037	0	2	0	0	2
49	3	CALF	-39.79	-73.39	1	1	0.2	10.1	1	11	13	0	248	272	0.8	13.75	16.25	0	310	340	1.04532	0.30103	2	0	0	2
50	3	CALF	-39.79	-73.39	1	1	0.21	10.2	1	11	13	0	248	272	0.8	13.75	16.25	0	310	340	1.04922	0.30103	2	0	0	2
51	3	CALF	-39.79	-73.39	1	1	0.39	12.2	1	11	13	0	248	272	0.8	13.75	16.25	0	310	340	1.12057	0.30103	2	0	0	2
52	3	CALF	-39.79	-73.39	1	1	0.32	11.5	0	11	13	0	248	272	0.8	13.75	16.25	0	310	340	1.09691	0	2	0	0	2
53	3	CALF	-39.79	-73.39	1	1	0.44	12.2	0	11	13	0	248	272	0.8	13.75	16.25	0	310	340	1.12057	0	2	0	0	2
54	3	CALF	-39.79	-73.39	1	1	0.46	13.1	1	11	13	0	248	272	0.8	13.75	16.25	0	310	340	1.14922	0.30103	2	0	0	2
55	3	CALF	-39.79	-73.39	1	2	1.07	16.6	0	11	13	0	248	272	0.8	13.75	16.25	0	310	340	1.24551	0	2	0	0	2
56	3	CALF	-39.79	-73.39	1	2	1.12	17.1	0	11	13	0	248	272	0.8	13.75	16.25	0	310	340	1.25768	0	2	0	0	2
57	3	CALF	-39.79	-73.39	1	3	1.18	16.8	0	11	13	0	248	272	0.8	13.75	16.25	0	310	340	1.25042	0	2	0	0	2
58	3	CALF	-39.79	-73.39	1	2	1.04	17.4	0	11	13	0	248	272	0.8	13.75	16.25	0	310	340	1.26482	0	2	0	0	2
59	3	CALF	-39.79	-73.39	1	3	1.2	18.2	1	11	13	0	248	272	0.8	13.75	16.25	0	310	340	1.2833	0.30103	2	0	0	2
60	3	CALF	-39.79	-73.39	1	3	0.97	16.1	1	11	13	0	248	272	0.8	13.75	16.25	0	310	340	1.233	0.30103	2	0	0	2
61	3	CALF	-39.79	-73.39	1	3	1.33	17.8	1	11	13	0	248	272	0.8	13.75	16.25	0	310	340	1.27416	0.30103	2	0	0	2
62	3	CALF	-39.79	-73.39	1	2	1.36	17.8	1	11	13	0	248	272	0.8	13.75	16.25	0	310	340	1.27416	0.30103	2	0	0	2
63	3	CALF	-39.79	-73.39	1	3	1.11	16.9	1	11	13	0	248	272	0.8	13.75	16.25	0	310	340	1.25285	0.30103	2	0	0	2
64	3	CALF	-39.79	-73.39	1	3	1.67	18.8	2	11	13	0	248	272	0.8	13.75	16.25	0	310	340	1.29667	0.477121	2	0	0	2
65	3	CALF	-39.79	-73.39	1	3	3.45	25.3	3	11	13	0	248	272	0.8	13.75	16.25	0	310	340	1.41996	0.60206	2	0	0	2
66	3	CALF	-39.79	-73.39	1	3	5.84	27.8	9	11	13	0	248	272	0.8	13.75	16.25	0	310	340	1.45939	1	2	0	0	2
67	3	CALF	-39.79	-73.39	1	3	5.56	27.4	7	11	13	0	248	272	0.8	13.75	16.25	0	310	340	1.45332	0.90309	2	0	0	2
68	4	CALF	-39.79	-73.39	1	1	0.06	6.4	0	11	13	0	248	272	0.8	13.75	16.25	0	310	340	0.869232	0	2	0	0	2
69	4	CALF	-39.79	-73.39	1	1	0.05	6.7	0	11	13	0	248	272	0.8	13.75	16.25	0	310	340	0.886491	0	2	0	0	2
70	4	CALF	-39.79	-73.39	1	1	0.1	7.7	0	11	13	0	248	272	0.8	13.75	16.25	0	310	340	0.939519	0	2	0	0	2
71	4	CALF	-39.79	-73.39	1	1	0.09	11.4	0	11	13	0	248	272	0.8	13.75	16.25	0	310	340	1.09342	0	2	0	0	2
72	4	CALF	-39.79	-73.39	1	1	0.02	8.9	0	11	13	0	248	272	0.8	13.75	16.25	0	310	340	0.995635	0	2	0	0	2
73	4	CALF	-39.79	-73.39	1	1	0.29	11.1	1	11	13	0	248	272	0.8	13.75	16.25	0	310	340	1.08279	0.30103	2	0	0	2
74	4	CALF	-39.79	-73.39	1	1	0.32	11.9	1	11	13	0	248	272	0.8	13.75	16.25	0	310	340	1.11059	0.30103	2	0	0	2
75	4	CALF	-39.79	-73.39	1	1	0.21	10	1	11	13	0	248	272	0.8	13.75	16.25	0	310	340	1.04139	0.30103	2	0	0	2
76	4	CALF	-39.79	-73.39	1	1	0.25	10.7	0	11	13	0	248	272	0.8	13.75	16.25	0	310	340	1.06819	0	2	0	0	2
77	4	CALF	-39.79	-73.39	1	1	0.24	10.4	3	11	13	0	248	272	0.8	13.75	16.25	0	310	340	1.0569	0.60206	2	0	0	2
78	4	CALF	-39.79	-73.39	1	1	0.25	11	1	11	13	0	248	272	0.8	13.75	16.25	0	310	340	1.07918	0.30103	2	0	0	2
79	4	CALF	-39.79	-73.39	1	1	0.23	10.4	0	11	13	0	248	272	0.8	13.75	16.25	0	310	340	1.0569	0	2	0	0	2
80	4	CALF	-39.79	-73.39	1	1	0.29	11.5	0	11	13	0	248	272	0.8	13.75	16.25	0	310	340	1.09691	0	2	0	0	2
81	4	CALF	-39.79	-73.39	1	1	0.27	11.1	1	11	13	0	248	272	0.8	13.75	16.25	0	310	340	1.08279	0.30103	2	0	0	2
82	4	CALF	-39.79	-73.39	1	1	0.32	11.7	1	11	13	0	248	272	0.8	13.75	16.25	0	310	340	1.1038	0.30103	2	0	0	2
83	4	CALF	-39.79	-73.39	1	1	0.37	12	3	11	13	0	248	272	0.8	13.75	16.25	0	310	340	1.11394	0.60206	2	0	0	2
84	4	CALF	-39.79	-73.39	1	1	0.36	11.6	0	11	13	0	248	272	0.8	13.75	16.25	0	310	340	1.10037	0	2	0	0	2
85	4	CALF	-39.79	-73.39	1	1	0.31	11.5	0	11	13	0	248	272	0.8	13.75	16.25	0	310	340	1.09691	0	2	0	0	2
86	4	CALF	-39.79	-73.39	1	1	0.38	12	2	11	13	0	248	272	0.8	13.75	16.25	0	310	340	1.11394	0.477121	2	0	0	2
87	4	CALF	-39.79	-73.39	1	1	0.37	11.9	1	11	13	0	248	272	0.8	13.75	16.25	0	310	340	1.11059	0.30103	2	0	0	2
88	4	CALF	-39.79	-73.39	1	1	0.36	12.1	0	11	13	0	248	272	0.8	13.75	16.25	0	310	340	1.11727	0	2	0	0	2
89	4	CALF	-39.79	-73.39	1	1	0.33	11.6	1	11	13	0	248	272	0.8	13.75	16.25	0	310	340	1.10037	0.30103	2	0	0	2
90	4	CALF	-39.79	-73.39	1	2	0.66	13.6	0	11	13	0	248	272	0.8	13.75	16.25	0	310	340	1.16435	0	2	0	0	2
91	4	CALF	-39.79	-73.39	1	1	0.64	14.5	0	11	13	0	248	272	0.8	13.75	16.25	0	310	340	1.19033	0	2	0	0	2
92	4	CALF	-39.79	-73.39	1	2	0.84	16.2	1	11	13	0	248	272	0.8	13.75	16.25	0	310	340	1.23553	0.30103	2	0	0	2
93	4	CALF	-39.79	-73.39	1	2	1.25	17.2	4	11	13	0	248	272	0.8	13.75	16.25	0	310	340	1.26007	0.69897	2	0	0	2
94	4	CALF	-39.79	-73.39	1	3	1.1	17.1	0	11	13	0	248	272	0.8	13.75	16.25	0	310	340	1.25768	0	2	0	0	2
95	4	CALF	-39.79	-73.39	1	3	1.49	18.2	0	11	13	0	248	272	0.8	13.75	16.25	0	310	340	1.2833	0	2	0	0	2
96	4	CALF	-39.79	-73.39	1	3	1.14	17.4	0	11	13	0	248	272	0.8	13.75	16.25	0	310	340	1.26482	0	2	0	0	2
97	4	CALF	-39.79	-73.39	1	3	3.53	23.6	3	11	13	0	248	272	0.8	13.75	16.25	0	310	340	1.39094	0.60206	2	0	0	2
98	4	CALF	-39.79	-73.39	1	3	2.91	22.1	2	11	13	0	248	272	0.8	13.75	16.25	0	310	340	1.36361	0.477121	2	0	0	2
99	4	CALF	-39.79	-73.39	1	3	3.54	23.6	4	11	13	0	248	272	0.8	13.75	16.25	0	310	340	1.39094	0.69897	2	0	0	2
100	4	CALF	-39.79	-73.39	1	3	3.31	23.7	3	11	13	0	248	272	0.8	13.75	16.25	0	310	340	1.3927	0.60206	2	0	0	2
101	4	CALF	-39.79	-73.39	1	3	3.58	23.5	4	11	13	0	248	272	0.8	13.75	16.25	0	310	340	1.38917	0.69897	2	0	0	2
102	4	CALF	-39.79	-73.39	1	3	4.73	25.6	3	11	13	0	248	272	0.8	13.75	16.25	0	310	340	1.42488	0.60206	2	0	0	2
103	4	CALF	-39.79	-73.39	1	3	4.98	27.5	4	11	13	0	248	272	0.8	13.75	16.25	0	310	340	1.45484	0.69897	2	0	0	2
104	1	CHAI	-39.94	-73.58	1	3	3.6	23.4	0	0	0	0	26	26	0.59	0	0	0	44.0678	44.0678	1.38739	0	37	0	0	37
105	1	CHAI	-39.94	-73.58	1	2	1	13.6	0	0	0	0	26	26	0.59	0	0	0	44.0678	44.0678	1.16435	0	37	0	0	37
106	1	CHAI	-39.94	-73.58	1	2	1.22	20.2	0	0	0	0	26	26	0.59	0	0	0	44.0678	44.0678	1.32634	0	37	0	0	37
107	1	CHAI	-39.94	-73.58	1	1	0.35	11	0	0	0	0	26	26	0.59	0	0	0	44.0678	44.0678	1.07918	0	37	0	0	37
108	1	CHAI	-39.94	-73.58	1	1	0.36	11.1	0	0	0	0	26	26	0.59	0	0	0	44.0678	44.0678	1.08279	0	37	0	0	37
109	1	CHAI	-39.94	-73.58	1	1	0.31	11	0	0	0	0	26	26	0.59	0	0	0	44.0678	44.0678	1.07918	0	37	0	0	37
110	1	CHAI	-39.94	-73.58	1	1	0.31	11.5	1	0	0	0	26	26	0.59	0	0	0	44.0678	44.0678	1.09691	0.30103	37	0	0	37
111	1	CHAI	-39.94	-73.58	1	1	0.63	13.7	3	0	0	0	26	26	0.59	0	0	0	44.0678	44.0678	1.16732	0.60206	37	0	0	37
112	1	CHAI	-39.94	-73.58	1	1	0.79	14.5	0	0	0	0	26	26	0.59	0	0	0	44.0678	44.0678	1.19033	0	37	0	0	37
113	2	CHAI	-39.94	-73.58	1	1	0.33	11.2	2	0	0	0	26	26	0.59	0	0	0	44.0678	44.0678	1.08636	0.477121	37	0	0	37
114	2	CHAI	-39.94	-73.58	1	1	0.36	12.7	0	0	0	0	26	26	0.59	0	0	0	44.0678	44.0678	1.13672	0	37	0	0	37
115	2	CHAI	-39.94	-73.58	1	1	0.15	9.3	0	0	0	0	26	26	0.59	0	0	0	44.0678	44.0678	1.01284	0	37	0	0	37
116	2	CHAI	-39.94	-73.58	1	1	0.33	10.5	0	0	0	0	26	26	0.59	0	0	0	44.0678	44.0678	1.0607	0	37	0	0	37
117	2	CHAI	-39.94	-73.58	1	3	2.02	20.5	0	0	0	0	26	26	0.59	0	0	0	44.0678	44.0678	1.33244	0	37	0	0	37
118	2	CHAI	-39.94	-73.58	1	3	3.29	22.5	3	0	0	0	26	26	0.59	0	0	0	44.0678	44.0678	1.37107	0.60206	37	0	0	37
119	2	CHAI	-39.94	-73.58	1	3	3.32	22	1	0	0	0	26	26	0.59	0	0	0	44.0678	44.0678	1.36173	0.30103	37	0	0	37
120	2	CHAI	-39.94	-73.58	1	1	0.03	5.4	0	0	0	0	26	26	0.59	0	0	0	44.0678	44.0678	0.80618	0	37	0	0	37
121	2	CHAI	-39.94	-73.58	1	1	0.04	6.5	0	0	0	0	26	26	0.59	0	0	0	44.0678	44.0678	0.875061	0	37	0	0	37
122	3	CHAI	-39.94	-73.58	1	1	0.33	11.2	1	0	0	0	26	26	0.59	0	0	0	44.0678	44.0678	1.08636	0.30103	37	0	0	37
123	3	CHAI	-39.94	-73.58	1	1	0.31	10.5	0	0	0	0	26	26	0.59	0	0	0	44.0678	44.0678	1.0607	0	37	0	0	37
124	3	CHAI	-39.94	-73.58	1	1	0.42	12.5	0	0	0	0	26	26	0.59	0	0	0	44.0678	44.0678	1.13033	0	37	0	0	37
125	3	CHAI	-39.94	-73.58	1	1	0.57	13.5	1	0	0	0	26	26	0.59	0	0	0	44.0678	44.0678	1.16137	0.30103	37	0	0	37
126	3	CHAI	-39.94	-73.58	1	1	0.67	14	0	0	0	0	26	26	0.59	0	0	0	44.0678	44.0678	1.17609	0	37	0	0	37
127	3	CHAI	-39.94	-73.58	1	2	0.97	16	1	0	0	0	26	26	0.59	0	0	0	44.0678	44.0678	1.23045	0.30103	37	0	0	37
128	4	CHAI	-39.94	-73.58	1	1	0.73	13.5	3	0	0	0	26	26	0.59	0	0	0	44.0678	44.0678	1.16137	0.60206	37	0	0	37
129	4	CHAI	-39.94	-73.58	1	2	1.04	17.2	0	0	0	0	26	26	0.59	0	0	0	44.0678	44.0678	1.26007	0	37	0	0	37
130	4	CHAI	-39.94	-73.58	1	3	1.12	17.2	0	0	0	0	26	26	0.59	0	0	0	44.0678	44.0678	1.26007	0	37	0	0	37
131	4	CHAI	-39.94	-73.58	1	3	2.46	20.1	1	0	0	0	26	26	0.59	0	0	0	44.0678	44.0678	1.32428	0.30103	37	0	0	37
132	4	CHAI	-39.94	-73.58	1	3	5.56	28.2	4	0	0	0	26	26	0.59	0	0	0	44.0678	44.0678	1.46538	0.69897	37	0	0	37
133	4	CHAI	-39.94	-73.58	1	3	2.47	21.5	2	0	0	0	26	26	0.59	0	0	0	44.0678	44.0678	1.35218	0.477121	37	0	0	37
134	1	CHEU	-39.4	-73.22	1	1	0.44	13.6	1	8	0	0	37	45	0.34	23.5294	0	0	108.824	132.353	1.16435	0.30103	7	3	0	10
135	1	CHEU	-39.4	-73.22	1	1	0.32	11.4	1	8	0	0	37	45	0.34	23.5294	0	0	108.824	132.353	1.09342	0.30103	7	3	0	10
136	1	CHEU	-39.4	-73.22	1	1	0.56	14.4	0	8	0	0	37	45	0.34	23.5294	0	0	108.824	132.353	1.18752	0	7	3	0	10
137	1	CHEU	-39.4	-73.22	1	3	1.66	19.2	6	8	0	0	37	45	0.34	23.5294	0	0	108.824	132.353	1.30535	0.845098	7	3	0	10
138	1	CHEU	-39.4	-73.22	1	1	0.26	11	1	8	0	0	37	45	0.34	23.5294	0	0	108.824	132.353	1.07918	0.30103	7	3	0	10
139	1	CHEU	-39.4	-73.22	1	3	1.26	17.4	1	8	0	0	37	45	0.34	23.5294	0	0	108.824	132.353	1.26482	0.30103	7	3	0	10
140	1	CHEU	-39.4	-73.22	1	3	2.01	19	0	8	0	0	37	45	0.34	23.5294	0	0	108.824	132.353	1.30103	0	7	3	0	10
141	1	CHEU	-39.4	-73.22	1	3	1.63	19.2	5	8	0	0	37	45	0.34	23.5294	0	0	108.824	132.353	1.30535	0.778151	7	3	0	10
142	1	CHEU	-39.4	-73.22	1	3	1.39	18.7	1	8	0	0	37	45	0.34	23.5294	0	0	108.824	132.353	1.29447	0.30103	7	3	0	10
143	1	CHEU	-39.4	-73.22	1	1	0.09	7.4	0	8	0	0	37	45	0.34	23.5294	0	0	108.824	132.353	0.924279	0	7	3	0	10
144	1	CHEU	-39.4	-73.22	1	1	0.07	7.5	0	8	0	0	37	45	0.34	23.5294	0	0	108.824	132.353	0.929419	0	7	3	0	10
145	1	CHEU	-39.4	-73.22	1	1	0.28	10.9	2	8	0	0	37	45	0.34	23.5294	0	0	108.824	132.353	1.07555	0.477121	7	3	0	10
146	1	CHEU	-39.4	-73.22	1	1	0.38	12.1	0	8	0	0	37	45	0.34	23.5294	0	0	108.824	132.353	1.11727	0	7	3	0	10
147	1	CHEU	-39.4	-73.22	1	1	0.31	11.9	1	8	0	0	37	45	0.34	23.5294	0	0	108.824	132.353	1.11059	0.30103	7	3	0	10
148	1	CHEU	-39.4	-73.22	1	1	0.36	11.5	1	8	0	0	37	45	0.34	23.5294	0	0	108.824	132.353	1.09691	0.30103	7	3	0	10
149	1	CHEU	-39.4	-73.22	1	1	0.42	12.4	2	8	0	0	37	45	0.34	23.5294	0	0	108.824	132.353	1.1271	0.477121	7	3	0	10
150	1	CHEU	-39.4	-73.22	1	3	1.33	17.6	3	8	0	0	37	45	0.34	23.5294	0	0	108.824	132.353	1.26951	0.60206	7	3	0	10
151	2	CHEU	-39.4	-73.22	1	1	0.08	6.8	0	8	0	0	37	45	0.34	23.5294	0	0	108.824	132.353	0.892095	0	7	3	0	10
152	2	CHEU	-39.4	-73.22	1	1	0.37	11.4	3	8	0	0	37	45	0.34	23.5294	0	0	108.824	132.353	1.09342	0.60206	7	3	0	10
153	2	CHEU	-39.4	-73.22	1	1	0.39	12.7	2	8	0	0	37	45	0.34	23.5294	0	0	108.824	132.353	1.13672	0.477121	7	3	0	10
154	2	CHEU	-39.4	-73.22	1	1	0.3	11.2	2	8	0	0	37	45	0.34	23.5294	0	0	108.824	132.353	1.08636	0.477121	7	3	0	10
155	2	CHEU	-39.4	-73.22	1	1	0.37	16.3	3	8	0	0	37	45	0.34	23.5294	0	0	108.824	132.353	1.23805	0.60206	7	3	0	10
156	2	CHEU	-39.4	-73.22	1	1	0.47	13.1	0	8	0	0	37	45	0.34	23.5294	0	0	108.824	132.353	1.14922	0	7	3	0	10
157	2	CHEU	-39.4	-73.22	1	3	1.6	19.2	1	8	0	0	37	45	0.34	23.5294	0	0	108.824	132.353	1.30535	0.30103	7	3	0	10
158	2	CHEU	-39.4	-73.22	1	3	1.31	18.6	3	8	0	0	37	45	0.34	23.5294	0	0	108.824	132.353	1.29226	0.60206	7	3	0	10
159	2	CHEU	-39.4	-73.22	1	3	1.25	17.8	0	8	0	0	37	45	0.34	23.5294	0	0	108.824	132.353	1.27416	0	7	3	0	10
160	2	CHEU	-39.4	-73.22	1	3	1.16	17.4	2	8	0	0	37	45	0.34	23.5294	0	0	108.824	132.353	1.26482	0.477121	7	3	0	10
161	2	CHEU	-39.4	-73.22	1	3	3.18	22.8	3	8	0	0	37	45	0.34	23.5294	0	0	108.824	132.353	1.37658	0.60206	7	3	0	10
162	2	CHEU	-39.4	-73.22	1	3	4.39	26.5	2	8	0	0	37	45	0.34	23.5294	0	0	108.824	132.353	1.43933	0.477121	7	3	0	10
163	2	CHEU	-39.4	-73.22	1	3	2.35	20.4	1	8	0	0	37	45	0.34	23.5294	0	0	108.824	132.353	1.33041	0.30103	7	3	0	10
164	2	CHEU	-39.4	-73.22	1	3	1.89	19.6	2	8	0	0	37	45	0.34	23.5294	0	0	108.824	132.353	1.31387	0.477121	7	3	0	10
165	2	CHEU	-39.4	-73.22	1	3	2.1	20.6	1	8	0	0	37	45	0.34	23.5294	0	0	108.824	132.353	1.33445	0.30103	7	3	0	10
166	2	CHEU	-39.4	-73.22	1	3	1.33	17.3	0	8	0	0	37	45	0.34	23.5294	0	0	108.824	132.353	1.26245	0	7	3	0	10
167	2	CHEU	-39.4	-73.22	1	3	1.63	18.8	4	8	0	0	37	45	0.34	23.5294	0	0	108.824	132.353	1.29667	0.69897	7	3	0	10
168	3	CHEU	-39.4	-73.22	1	1	0.23	11.9	0	8	0	0	37	45	0.34	23.5294	0	0	108.824	132.353	1.11059	0	7	3	0	10
169	3	CHEU	-39.4	-73.22	1	1	0.36	11.9	3	8	0	0	37	45	0.34	23.5294	0	0	108.824	132.353	1.11059	0.60206	7	3	0	10
170	3	CHEU	-39.4	-73.22	1	3	1.99	19.2	3	8	0	0	37	45	0.34	23.5294	0	0	108.824	132.353	1.30535	0.60206	7	3	0	10
171	3	CHEU	-39.4	-73.22	1	3	1.55	18.7	1	8	0	0	37	45	0.34	23.5294	0	0	108.824	132.353	1.29447	0.30103	7	3	0	10
172	4	CHEU	-39.4	-73.22	1	1	0.42	12.7	0	8	0	0	37	45	0.34	23.5294	0	0	108.824	132.353	1.13672	0	7	3	0	10
173	4	CHEU	-39.4	-73.22	1	1	0.34	11.2	0	8	0	0	37	45	0.34	23.5294	0	0	108.824	132.353	1.08636	0	7	3	0	10
174	4	CHEU	-39.4	-73.22	1	2	0.95	15.3	3	8	0	0	37	45	0.34	23.5294	0	0	108.824	132.353	1.21219	0.60206	7	3	0	10
175	4	CHEU	-39.4	-73.22	1	3	7.37	29.5	16	8	0	0	37	45	0.34	23.5294	0	0	108.824	132.353	1.4843	1.23045	7	3	0	10
176	4	CHEU	-39.4	-73.22	1	3	2.2	20.6	2	8	0	0	37	45	0.34	23.5294	0	0	108.824	132.353	1.33445	0.477121	7	3	0	10
177	1	CURI	-39.73	-73.39	1	1	0.09	6.7	0	90	0	0	434	524	0.92	97.8261	0	0	471.739	569.565	0.886491	0	58	4	4	66
178	1	CURI	-39.73	-73.39	1	1	0.32	11.2	1	90	0	0	434	524	0.92	97.8261	0	0	471.739	569.565	1.08636	0.30103	58	4	4	66
179	1	CURI	-39.73	-73.39	1	1	0.45	12.7	1	90	0	0	434	524	0.92	97.8261	0	0	471.739	569.565	1.13672	0.30103	58	4	4	66
180	1	CURI	-39.73	-73.39	1	2	0.77	14.4	2	90	0	0	434	524	0.92	97.8261	0	0	471.739	569.565	1.18752	0.477121	58	4	4	66
181	1	CURI	-39.73	-73.39	1	1	0.57	13.5	1	90	0	0	434	524	0.92	97.8261	0	0	471.739	569.565	1.16137	0.30103	58	4	4	66
182	1	CURI	-39.73	-73.39	1	1	0.54	13.3	0	90	0	0	434	524	0.92	97.8261	0	0	471.739	569.565	1.15534	0	58	4	4	66
183	1	CURI	-39.73	-73.39	1	1	0.37	11.4	0	90	0	0	434	524	0.92	97.8261	0	0	471.739	569.565	1.09342	0	58	4	4	66
184	1	CURI	-39.73	-73.39	1	1	0.43	11.4	0	90	0	0	434	524	0.92	97.8261	0	0	471.739	569.565	1.09342	0	58	4	4	66
185	1	CURI	-39.73	-73.39	1	1	0.38	11.5	1	90	0	0	434	524	0.92	97.8261	0	0	471.739	569.565	1.09691	0.30103	58	4	4	66
186	1	CURI	-39.73	-73.39	1	1	0.05	6.2	0	90	0	0	434	524	0.92	97.8261	0	0	471.739	569.565	0.857332	0	58	4	4	66
187	1	CURI	-39.73	-73.39	1	1	0.06	5	0	90	0	0	434	524	0.92	97.8261	0	0	471.739	569.565	0.778151	0	58	4	4	66
188	1	CURI	-39.73	-73.39	1	1	0.05	6.3	0	90	0	0	434	524	0.92	97.8261	0	0	471.739	569.565	0.863323	0	58	4	4	66
189	1	CURI	-39.73	-73.39	1	1	0.06	6.5	0	90	0	0	434	524	0.92	97.8261	0	0	471.739	569.565	0.875061	0	58	4	4	66
190	1	CURI	-39.73	-73.39	1	1	0.06	6.5	0	90	0	0	434	524	0.92	97.8261	0	0	471.739	569.565	0.875061	0	58	4	4	66
191	1	CURI	-39.73	-73.39	1	1	0.05	5.7	0	90	0	0	434	524	0.92	97.8261	0	0	471.739	569.565	0.826075	0	58	4	4	66
192	1	CURI	-39.73	-73.39	1	1	0.05	6.4	0	90	0	0	434	524	0.92	97.8261	0	0	471.739	569.565	0.869232	0	58	4	4	66
193	1	CURI	-39.73	-73.39	1	1	0.04	6.1	0	90	0	0	434	524	0.92	97.8261	0	0	471.739	569.565	0.851258	0	58	4	4	66
194	1	CURI	-39.73	-73.39	1	3	3.16	22.9	2	90	0	0	434	524	0.92	97.8261	0	0	471.739	569.565	1.3784	0.477121	58	4	4	66
195	1	CURI	-39.73	-73.39	1	3	5.79	27.1	14	90	0	0	434	524	0.92	97.8261	0	0	471.739	569.565	1.44871	1.17609	58	4	4	66
196	1	CURI	-39.73	-73.39	1	1	0.05	6.7	0	90	0	0	434	524	0.92	97.8261	0	0	471.739	569.565	0.886491	0	58	4	4	66
197	2	CURI	-39.73	-73.39	1	1	0.22	9.8	0	90	0	0	434	524	0.92	97.8261	0	0	471.739	569.565	1.03342	0	58	4	4	66
198	2	CURI	-39.73	-73.39	1	1	0.42	12.3	1	90	0	0	434	524	0.92	97.8261	0	0	471.739	569.565	1.12385	0.30103	58	4	4	66
199	2	CURI	-39.73	-73.39	1	1	0.36	11.2	0	90	0	0	434	524	0.92	97.8261	0	0	471.739	569.565	1.08636	0	58	4	4	66
200	2	CURI	-39.73	-73.39	1	1	0.4	11.5	0	90	0	0	434	524	0.92	97.8261	0	0	471.739	569.565	1.09691	0	58	4	4	66
201	2	CURI	-39.73	-73.39	1	1	0.44	11.8	2	90	0	0	434	524	0.92	97.8261	0	0	471.739	569.565	1.10721	0.477121	58	4	4	66
202	2	CURI	-39.73	-73.39	1	1	0.06	6	0	90	0	0	434	524	0.92	97.8261	0	0	471.739	569.565	0.845098	0	58	4	4	66
203	2	CURI	-39.73	-73.39	1	1	0.09	6.9	0	90	0	0	434	524	0.92	97.8261	0	0	471.739	569.565	0.897627	0	58	4	4	66
204	2	CURI	-39.73	-73.39	1	1	0.08	6.1	0	90	0	0	434	524	0.92	97.8261	0	0	471.739	569.565	0.851258	0	58	4	4	66
205	2	CURI	-39.73	-73.39	1	1	0.05	6.2	0	90	0	0	434	524	0.92	97.8261	0	0	471.739	569.565	0.857332	0	58	4	4	66
206	2	CURI	-39.73	-73.39	1	1	0.07	6.8	0	90	0	0	434	524	0.92	97.8261	0	0	471.739	569.565	0.892095	0	58	4	4	66
207	2	CURI	-39.73	-73.39	1	1	0.05	6.4	0	90	0	0	434	524	0.92	97.8261	0	0	471.739	569.565	0.869232	0	58	4	4	66
208	2	CURI	-39.73	-73.39	1	1	0.05	6.8	0	90	0	0	434	524	0.92	97.8261	0	0	471.739	569.565	0.892095	0	58	4	4	66
209	2	CURI	-39.73	-73.39	1	1	0.04	5.6	0	90	0	0	434	524	0.92	97.8261	0	0	471.739	569.565	0.819544	0	58	4	4	66
210	2	CURI	-39.73	-73.39	1	1	0.42	12.9	1	90	0	0	434	524	0.92	97.8261	0	0	471.739	569.565	1.14301	0.30103	58	4	4	66
211	2	CURI	-39.73	-73.39	1	1	0.36	12.4	0	90	0	0	434	524	0.92	97.8261	0	0	471.739	569.565	1.1271	0	58	4	4	66
212	2	CURI	-39.73	-73.39	1	1	0.32	11.3	0	90	0	0	434	524	0.92	97.8261	0	0	471.739	569.565	1.08991	0	58	4	4	66
213	2	CURI	-39.73	-73.39	1	1	0.36	11.6	0	90	0	0	434	524	0.92	97.8261	0	0	471.739	569.565	1.10037	0	58	4	4	66
214	2	CURI	-39.73	-73.39	1	1	0.25	10.2	1	90	0	0	434	524	0.92	97.8261	0	0	471.739	569.565	1.04922	0.30103	58	4	4	66
215	2	CURI	-39.73	-73.39	1	1	0.29	11.4	1	90	0	0	434	524	0.92	97.8261	0	0	471.739	569.565	1.09342	0.30103	58	4	4	66
216	2	CURI	-39.73	-73.39	1	1	0.21	10	0	90	0	0	434	524	0.92	97.8261	0	0	471.739	569.565	1.04139	0	58	4	4	66
217	2	CURI	-39.73	-73.39	1	1	0.28	11.4	0	90	0	0	434	524	0.92	97.8261	0	0	471.739	569.565	1.09342	0	58	4	4	66
218	2	CURI	-39.73	-73.39	1	1	0.22	10.4	0	90	0	0	434	524	0.92	97.8261	0	0	471.739	569.565	1.0569	0	58	4	4	66
219	2	CURI	-39.73	-73.39	1	1	0.29	11.1	0	90	0	0	434	524	0.92	97.8261	0	0	471.739	569.565	1.08279	0	58	4	4	66
220	2	CURI	-39.73	-73.39	1	1	0.31	11.5	2	90	0	0	434	524	0.92	97.8261	0	0	471.739	569.565	1.09691	0.477121	58	4	4	66
221	2	CURI	-39.73	-73.39	1	1	0.23	10.7	1	90	0	0	434	524	0.92	97.8261	0	0	471.739	569.565	1.06819	0.30103	58	4	4	66
222	2	CURI	-39.73	-73.39	1	1	0.27	11.2	1	90	0	0	434	524	0.92	97.8261	0	0	471.739	569.565	1.08636	0.30103	58	4	4	66
223	2	CURI	-39.73	-73.39	1	1	0.23	10.7	0	90	0	0	434	524	0.92	97.8261	0	0	471.739	569.565	1.06819	0	58	4	4	66
224	2	CURI	-39.73	-73.39	1	1	0.1	8.6	0	90	0	0	434	524	0.92	97.8261	0	0	471.739	569.565	0.982271	0	58	4	4	66
225	2	CURI	-39.73	-73.39	1	2	0.77	15.3	1	90	0	0	434	524	0.92	97.8261	0	0	471.739	569.565	1.21219	0.30103	58	4	4	66
226	2	CURI	-39.73	-73.39	1	2	1.05	17.1	0	90	0	0	434	524	0.92	97.8261	0	0	471.739	569.565	1.25768	0	58	4	4	66
227	2	CURI	-39.73	-73.39	1	1	0.35	11.6	0	90	0	0	434	524	0.92	97.8261	0	0	471.739	569.565	1.10037	0	58	4	4	66
228	2	CURI	-39.73	-73.39	1	1	0.28	10.6	0	90	0	0	434	524	0.92	97.8261	0	0	471.739	569.565	1.06446	0	58	4	4	66
229	2	CURI	-39.73	-73.39	1	1	0.33	11.1	0	90	0	0	434	524	0.92	97.8261	0	0	471.739	569.565	1.08279	0	58	4	4	66
230	2	CURI	-39.73	-73.39	1	1	0.39	11.6	0	90	0	0	434	524	0.92	97.8261	0	0	471.739	569.565	1.10037	0	58	4	4	66
231	2	CURI	-39.73	-73.39	1	1	0.3	10.9	0	90	0	0	434	524	0.92	97.8261	0	0	471.739	569.565	1.07555	0	58	4	4	66
232	2	CURI	-39.73	-73.39	1	1	0.35	11.6	0	90	0	0	434	524	0.92	97.8261	0	0	471.739	569.565	1.10037	0	58	4	4	66
233	2	CURI	-39.73	-73.39	1	1	0.38	11.6	1	90	0	0	434	524	0.92	97.8261	0	0	471.739	569.565	1.10037	0.30103	58	4	4	66
234	2	CURI	-39.73	-73.39	1	1	0.28	10.9	0	90	0	0	434	524	0.92	97.8261	0	0	471.739	569.565	1.07555	0	58	4	4	66
235	2	CURI	-39.73	-73.39	1	1	0.35	11.5	0	90	0	0	434	524	0.92	97.8261	0	0	471.739	569.565	1.09691	0	58	4	4	66
236	2	CURI	-39.73	-73.39	1	1	0.34	11.1	2	90	0	0	434	524	0.92	97.8261	0	0	471.739	569.565	1.08279	0.477121	58	4	4	66
237	2	CURI	-39.73	-73.39	1	1	0.4	12.6	4	90	0	0	434	524	0.92	97.8261	0	0	471.739	569.565	1.13354	0.69897	58	4	4	66
238	2	CURI	-39.73	-73.39	1	1	0.28	10.9	2	90	0	0	434	524	0.92	97.8261	0	0	471.739	569.565	1.07555	0.477121	58	4	4	66
239	2	CURI	-39.73	-73.39	1	2	0.54	13.2	0	90	0	0	434	524	0.92	97.8261	0	0	471.739	569.565	1.15229	0	58	4	4	66
240	2	CURI	-39.73	-73.39	1	1	0.7	14.9	0	90	0	0	434	524	0.92	97.8261	0	0	471.739	569.565	1.2014	0	58	4	4	66
241	2	CURI	-39.73	-73.39	1	1	0.32	11.3	0	90	0	0	434	524	0.92	97.8261	0	0	471.739	569.565	1.08991	0	58	4	4	66
242	2	CURI	-39.73	-73.39	1	2	0.73	15.6	0	90	0	0	434	524	0.92	97.8261	0	0	471.739	569.565	1.22011	0	58	4	4	66
243	2	CURI	-39.73	-73.39	1	1	0.62	13.5	1	90	0	0	434	524	0.92	97.8261	0	0	471.739	569.565	1.16137	0.30103	58	4	4	66
244	2	CURI	-39.73	-73.39	1	1	0.34	11.6	0	90	0	0	434	524	0.92	97.8261	0	0	471.739	569.565	1.10037	0	58	4	4	66
245	2	CURI	-39.73	-73.39	1	3	1.12	17.2	0	90	0	0	434	524	0.92	97.8261	0	0	471.739	569.565	1.26007	0	58	4	4	66
246	2	CURI	-39.73	-73.39	1	3	1.07	16.8	0	90	0	0	434	524	0.92	97.8261	0	0	471.739	569.565	1.25042	0	58	4	4	66
247	2	CURI	-39.73	-73.39	1	3	1.31	17.8	1	90	0	0	434	524	0.92	97.8261	0	0	471.739	569.565	1.27416	0.30103	58	4	4	66
248	2	CURI	-39.73	-73.39	1	1	0.05	6.5	0	90	0	0	434	524	0.92	97.8261	0	0	471.739	569.565	0.875061	0	58	4	4	66
249	2	CURI	-39.73	-73.39	1	1	0.02	4.8	0	90	0	0	434	524	0.92	97.8261	0	0	471.739	569.565	0.763428	0	58	4	4	66
250	2	CURI	-39.73	-73.39	1	3	1.34	17.2	0	90	0	0	434	524	0.92	97.8261	0	0	471.739	569.565	1.26007	0	58	4	4	66
251	2	CURI	-39.73	-73.39	1	2	2.91	23.1	2	90	0	0	434	524	0.92	97.8261	0	0	471.739	569.565	1.38202	0.477121	58	4	4	66
252	2	CURI	-39.73	-73.39	1	3	2.91	22.2	0	90	0	0	434	524	0.92	97.8261	0	0	471.739	569.565	1.36549	0	58	4	4	66
253	2	CURI	-39.73	-73.39	1	3	5.09	25.6	4	90	0	0	434	524	0.92	97.8261	0	0	471.739	569.565	1.42488	0.69897	58	4	4	66
254	2	CURI	-39.73	-73.39	1	3	2.8	22.1	1	90	0	0	434	524	0.92	97.8261	0	0	471.739	569.565	1.36361	0.30103	58	4	4	66
255	2	CURI	-39.73	-73.39	1	3	4.55	25	4	90	0	0	434	524	0.92	97.8261	0	0	471.739	569.565	1.41497	0.69897	58	4	4	66
256	2	CURI	-39.73	-73.39	1	3	3.17	21.8	0	90	0	0	434	524	0.92	97.8261	0	0	471.739	569.565	1.35793	0	58	4	4	66
257	2	CURI	-39.73	-73.39	1	3	5.65	27.2	1	90	0	0	434	524	0.92	97.8261	0	0	471.739	569.565	1.45025	0.30103	58	4	4	66
258	2	CURI	-39.73	-73.39	1	3	4.58	25.4	6	90	0	0	434	524	0.92	97.8261	0	0	471.739	569.565	1.4216	0.845098	58	4	4	66
259	2	CURI	-39.73	-73.39	1	3	2.85	22	1	90	0	0	434	524	0.92	97.8261	0	0	471.739	569.565	1.36173	0.30103	58	4	4	66
260	3	CURI	-39.73	-73.39	1	1	0.06	5.9	0	90	0	0	434	524	0.92	97.8261	0	0	471.739	569.565	0.838849	0	58	4	4	66
261	3	CURI	-39.73	-73.39	1	1	0.06	6	0	90	0	0	434	524	0.92	97.8261	0	0	471.739	569.565	0.845098	0	58	4	4	66
262	3	CURI	-39.73	-73.39	1	1	0.11	7.9	0	90	0	0	434	524	0.92	97.8261	0	0	471.739	569.565	0.94939	0	58	4	4	66
263	3	CURI	-39.73	-73.39	1	1	0.33	11.5	0	90	0	0	434	524	0.92	97.8261	0	0	471.739	569.565	1.09691	0	58	4	4	66
264	3	CURI	-39.73	-73.39	1	1	0.61	13.2	3	90	0	0	434	524	0.92	97.8261	0	0	471.739	569.565	1.15229	0.60206	58	4	4	66
265	3	CURI	-39.73	-73.39	1	1	0.29	10.7	0	90	0	0	434	524	0.92	97.8261	0	0	471.739	569.565	1.06819	0	58	4	4	66
266	3	CURI	-39.73	-73.39	1	1	0.4	11.6	0	90	0	0	434	524	0.92	97.8261	0	0	471.739	569.565	1.10037	0	58	4	4	66
267	3	CURI	-39.73	-73.39	1	1	0.3	11.6	1	90	0	0	434	524	0.92	97.8261	0	0	471.739	569.565	1.10037	0.30103	58	4	4	66
268	3	CURI	-39.73	-73.39	1	1	0.36	11.7	0	90	0	0	434	524	0.92	97.8261	0	0	471.739	569.565	1.1038	0	58	4	4	66
269	3	CURI	-39.73	-73.39	1	1	0.34	11.1	0	90	0	0	434	524	0.92	97.8261	0	0	471.739	569.565	1.08279	0	58	4	4	66
270	3	CURI	-39.73	-73.39	1	1	0.31	11.1	0	90	0	0	434	524	0.92	97.8261	0	0	471.739	569.565	1.08279	0	58	4	4	66
271	3	CURI	-39.73	-73.39	1	1	0.31	11.4	0	90	0	0	434	524	0.92	97.8261	0	0	471.739	569.565	1.09342	0	58	4	4	66
272	3	CURI	-39.73	-73.39	1	1	0.37	12	0	90	0	0	434	524	0.92	97.8261	0	0	471.739	569.565	1.11394	0	58	4	4	66
273	3	CURI	-39.73	-73.39	1	1	0.27	10.5	1	90	0	0	434	524	0.92	97.8261	0	0	471.739	569.565	1.0607	0.30103	58	4	4	66
274	3	CURI	-39.73	-73.39	1	1	0.32	11.1	0	90	0	0	434	524	0.92	97.8261	0	0	471.739	569.565	1.08279	0	58	4	4	66
275	3	CURI	-39.73	-73.39	1	1	0.32	11.3	1	90	0	0	434	524	0.92	97.8261	0	0	471.739	569.565	1.08991	0.30103	58	4	4	66
276	3	CURI	-39.73	-73.39	1	3	7.78	29.4	6	90	0	0	434	524	0.92	97.8261	0	0	471.739	569.565	1.48287	0.845098	58	4	4	66
277	3	CURI	-39.73	-73.39	1	1	0.4	11.6	0	90	0	0	434	524	0.92	97.8261	0	0	471.739	569.565	1.10037	0	58	4	4	66
278	3	CURI	-39.73	-73.39	1	1	0.43	12.5	1	90	0	0	434	524	0.92	97.8261	0	0	471.739	569.565	1.13033	0.30103	58	4	4	66
279	3	CURI	-39.73	-73.39	1	1	0.36	11.5	0	90	0	0	434	524	0.92	97.8261	0	0	471.739	569.565	1.09691	0	58	4	4	66
280	3	CURI	-39.73	-73.39	1	1	0.42	12.1	0	90	0	0	434	524	0.92	97.8261	0	0	471.739	569.565	1.11727	0	58	4	4	66
281	3	CURI	-39.73	-73.39	1	1	0.41	12.3	1	90	0	0	434	524	0.92	97.8261	0	0	471.739	569.565	1.12385	0.30103	58	4	4	66
282	3	CURI	-39.73	-73.39	1	1	0.22	11	0	90	0	0	434	524	0.92	97.8261	0	0	471.739	569.565	1.07918	0	58	4	4	66
283	3	CURI	-39.73	-73.39	1	1	0.37	11.6	1	90	0	0	434	524	0.92	97.8261	0	0	471.739	569.565	1.10037	0.30103	58	4	4	66
284	3	CURI	-39.73	-73.39	1	1	0.29	10.9	3	90	0	0	434	524	0.92	97.8261	0	0	471.739	569.565	1.07555	0.60206	58	4	4	66
285	3	CURI	-39.73	-73.39	1	1	0.23	9.9	0	90	0	0	434	524	0.92	97.8261	0	0	471.739	569.565	1.03743	0	58	4	4	66
286	3	CURI	-39.73	-73.39	1	1	0.3	11.5	0	90	0	0	434	524	0.92	97.8261	0	0	471.739	569.565	1.09691	0	58	4	4	66
287	3	CURI	-39.73	-73.39	1	1	0.27	11.1	2	90	0	0	434	524	0.92	97.8261	0	0	471.739	569.565	1.08279	0.477121	58	4	4	66
288	3	CURI	-39.73	-73.39	1	1	0.23	10.2	0	90	0	0	434	524	0.92	97.8261	0	0	471.739	569.565	1.04922	0	58	4	4	66
289	3	CURI	-39.73	-73.39	1	3	1.38	17.6	0	90	0	0	434	524	0.92	97.8261	0	0	471.739	569.565	1.26951	0	58	4	4	66
290	3	CURI	-39.73	-73.39	1	3	1.26	17.3	0	90	0	0	434	524	0.92	97.8261	0	0	471.739	569.565	1.26245	0	58	4	4	66
291	3	CURI	-39.73	-73.39	1	3	1.03	16.2	0	90	0	0	434	524	0.92	97.8261	0	0	471.739	569.565	1.23553	0	58	4	4	66
292	3	CURI	-39.73	-73.39	1	3	1.06	16.2	2	90	0	0	434	524	0.92	97.8261	0	0	471.739	569.565	1.23553	0.477121	58	4	4	66
293	3	CURI	-39.73	-73.39	1	3	1.15	17.1	1	90	0	0	434	524	0.92	97.8261	0	0	471.739	569.565	1.25768	0.30103	58	4	4	66
294	3	CURI	-39.73	-73.39	1	3	2.99	22.6	3	90	0	0	434	524	0.92	97.8261	0	0	471.739	569.565	1.37291	0.60206	58	4	4	66
295	3	CURI	-39.73	-73.39	1	3	2.96	22.9	3	90	0	0	434	524	0.92	97.8261	0	0	471.739	569.565	1.3784	0.60206	58	4	4	66
296	3	CURI	-39.73	-73.39	1	3	3.04	22.3	1	90	0	0	434	524	0.92	97.8261	0	0	471.739	569.565	1.36736	0.30103	58	4	4	66
297	3	CURI	-39.73	-73.39	1	3	2.33	21	3	90	0	0	434	524	0.92	97.8261	0	0	471.739	569.565	1.34242	0.60206	58	4	4	66
298	3	CURI	-39.73	-73.39	1	3	2.84	21.6	3	90	0	0	434	524	0.92	97.8261	0	0	471.739	569.565	1.35411	0.60206	58	4	4	66
299	3	CURI	-39.73	-73.39	1	3	2.78	22	1	90	0	0	434	524	0.92	97.8261	0	0	471.739	569.565	1.36173	0.30103	58	4	4	66
300	3	CURI	-39.73	-73.39	1	3	3.08	22.9	1	90	0	0	434	524	0.92	97.8261	0	0	471.739	569.565	1.3784	0.30103	58	4	4	66
301	3	CURI	-39.73	-73.39	1	3	2.85	22.1	1	90	0	0	434	524	0.92	97.8261	0	0	471.739	569.565	1.36361	0.30103	58	4	4	66
302	4	CURI	-39.73	-73.39	1	1	0.09	7.3	0	90	0	0	434	524	0.92	97.8261	0	0	471.739	569.565	0.919078	0	58	4	4	66
303	4	CURI	-39.73	-73.39	1	1	0.13	8	0	90	0	0	434	524	0.92	97.8261	0	0	471.739	569.565	0.954243	0	58	4	4	66
304	4	CURI	-39.73	-73.39	1	1	0.07	7.3	0	90	0	0	434	524	0.92	97.8261	0	0	471.739	569.565	0.919078	0	58	4	4	66
305	4	CURI	-39.73	-73.39	1	1	0.06	6.8	0	90	0	0	434	524	0.92	97.8261	0	0	471.739	569.565	0.892095	0	58	4	4	66
306	4	CURI	-39.73	-73.39	1	1	0.07	7	0	90	0	0	434	524	0.92	97.8261	0	0	471.739	569.565	0.90309	0	58	4	4	66
307	4	CURI	-39.73	-73.39	1	1	0.06	6	0	90	0	0	434	524	0.92	97.8261	0	0	471.739	569.565	0.845098	0	58	4	4	66
308	4	CURI	-39.73	-73.39	1	1	0.06	6.3	0	90	0	0	434	524	0.92	97.8261	0	0	471.739	569.565	0.863323	0	58	4	4	66
309	4	CURI	-39.73	-73.39	1	1	0.18	8.9	0	90	0	0	434	524	0.92	97.8261	0	0	471.739	569.565	0.995635	0	58	4	4	66
310	4	CURI	-39.73	-73.39	1	1	0.15	8.8	0	90	0	0	434	524	0.92	97.8261	0	0	471.739	569.565	0.991226	0	58	4	4	66
311	4	CURI	-39.73	-73.39	1	1	0.28	10.8	0	90	0	0	434	524	0.92	97.8261	0	0	471.739	569.565	1.07188	0	58	4	4	66
312	4	CURI	-39.73	-73.39	1	1	0.25	10.6	1	90	0	0	434	524	0.92	97.8261	0	0	471.739	569.565	1.06446	0.30103	58	4	4	66
313	4	CURI	-39.73	-73.39	1	1	0.26	10.8	0	90	0	0	434	524	0.92	97.8261	0	0	471.739	569.565	1.07188	0	58	4	4	66
314	4	CURI	-39.73	-73.39	1	1	0.35	11.3	3	90	0	0	434	524	0.92	97.8261	0	0	471.739	569.565	1.08991	0.60206	58	4	4	66
315	4	CURI	-39.73	-73.39	1	1	0.28	10.7	2	90	0	0	434	524	0.92	97.8261	0	0	471.739	569.565	1.06819	0.477121	58	4	4	66
316	4	CURI	-39.73	-73.39	1	1	0.34	11.2	0	90	0	0	434	524	0.92	97.8261	0	0	471.739	569.565	1.08636	0	58	4	4	66
317	4	CURI	-39.73	-73.39	1	1	0.29	10.3	0	90	0	0	434	524	0.92	97.8261	0	0	471.739	569.565	1.05308	0	58	4	4	66
318	4	CURI	-39.73	-73.39	1	1	0.31	11.8	1	90	0	0	434	524	0.92	97.8261	0	0	471.739	569.565	1.10721	0.30103	58	4	4	66
319	4	CURI	-39.73	-73.39	1	1	0.23	10.4	0	90	0	0	434	524	0.92	97.8261	0	0	471.739	569.565	1.0569	0	58	4	4	66
320	4	CURI	-39.73	-73.39	1	1	0.32	11.9	3	90	0	0	434	524	0.92	97.8261	0	0	471.739	569.565	1.11059	0.60206	58	4	4	66
321	4	CURI	-39.73	-73.39	1	2	0.66	13.9	0	90	0	0	434	524	0.92	97.8261	0	0	471.739	569.565	1.17319	0	58	4	4	66
322	4	CURI	-39.73	-73.39	1	1	0.34	11.6	1	90	0	0	434	524	0.92	97.8261	0	0	471.739	569.565	1.10037	0.30103	58	4	4	66
323	4	CURI	-39.73	-73.39	1	1	0.61	14.3	0	90	0	0	434	524	0.92	97.8261	0	0	471.739	569.565	1.18469	0	58	4	4	66
324	4	CURI	-39.73	-73.39	1	1	0.56	13.3	1	90	0	0	434	524	0.92	97.8261	0	0	471.739	569.565	1.15534	0.30103	58	4	4	66
325	4	CURI	-39.73	-73.39	1	1	0.42	11.8	0	90	0	0	434	524	0.92	97.8261	0	0	471.739	569.565	1.10721	0	58	4	4	66
326	4	CURI	-39.73	-73.39	1	1	0.33	11.2	0	90	0	0	434	524	0.92	97.8261	0	0	471.739	569.565	1.08636	0	58	4	4	66
327	4	CURI	-39.73	-73.39	1	1	0.26	11	0	90	0	0	434	524	0.92	97.8261	0	0	471.739	569.565	1.07918	0	58	4	4	66
328	4	CURI	-39.73	-73.39	1	1	0.44	13	1	90	0	0	434	524	0.92	97.8261	0	0	471.739	569.565	1.14613	0.30103	58	4	4	66
329	4	CURI	-39.73	-73.39	1	2	1.31	16.8	3	90	0	0	434	524	0.92	97.8261	0	0	471.739	569.565	1.25042	0.60206	58	4	4	66
330	4	CURI	-39.73	-73.39	1	2	1.06	16	1	90	0	0	434	524	0.92	97.8261	0	0	471.739	569.565	1.23045	0.30103	58	4	4	66
331	4	CURI	-39.73	-73.39	1	3	1.53	17.4	0	90	0	0	434	524	0.92	97.8261	0	0	471.739	569.565	1.26482	0	58	4	4	66
332	4	CURI	-39.73	-73.39	1	3	1.21	16.6	1	90	0	0	434	524	0.92	97.8261	0	0	471.739	569.565	1.24551	0.30103	58	4	4	66
333	4	CURI	-39.73	-73.39	1	2	0.84	15	2	90	0	0	434	524	0.92	97.8261	0	0	471.739	569.565	1.20412	0.477121	58	4	4	66
334	4	CURI	-39.73	-73.39	1	3	1.84	18.9	0	90	0	0	434	524	0.92	97.8261	0	0	471.739	569.565	1.29885	0	58	4	4	66
335	4	CURI	-39.73	-73.39	1	3	1.23	17.2	1	90	0	0	434	524	0.92	97.8261	0	0	471.739	569.565	1.26007	0.30103	58	4	4	66
336	4	CURI	-39.73	-73.39	1	3	2.27	19.9	1	90	0	0	434	524	0.92	97.8261	0	0	471.739	569.565	1.32015	0.30103	58	4	4	66
337	4	CURI	-39.73	-73.39	1	3	2.96	22.3	2	90	0	0	434	524	0.92	97.8261	0	0	471.739	569.565	1.36736	0.477121	58	4	4	66
338	4	CURI	-39.73	-73.39	1	3	3.45	23.3	1	90	0	0	434	524	0.92	97.8261	0	0	471.739	569.565	1.38561	0.30103	58	4	4	66
339	4	CURI	-39.73	-73.39	1	3	2.67	22	2	90	0	0	434	524	0.92	97.8261	0	0	471.739	569.565	1.36173	0.477121	58	4	4	66
340	4	CURI	-39.73	-73.39	1	3	5.79	27.9	1	90	0	0	434	524	0.92	97.8261	0	0	471.739	569.565	1.4609	0.30103	58	4	4	66
341	4	CURI	-39.73	-73.39	1	3	3.68	23.7	2	90	0	0	434	524	0.92	97.8261	0	0	471.739	569.565	1.3927	0.477121	58	4	4	66
342	4	CURI	-39.73	-73.39	1	3	3.52	22.8	2	90	0	0	434	524	0.92	97.8261	0	0	471.739	569.565	1.37658	0.477121	58	4	4	66
343	4	CURI	-39.73	-73.39	1	3	5.39	26.7	3	90	0	0	434	524	0.92	97.8261	0	0	471.739	569.565	1.44248	0.60206	58	4	4	66
344	1	CALF	-39.79	-73.39	2	1	0.18	9.3	0	74	12	2	432	520	0.8	92.5	15	2.5	540	650	1.01284	0	0	1	0	1
345	1	CALF	-39.79	-73.39	2	1	0.49	11.9	1	74	12	2	432	520	0.8	92.5	15	2.5	540	650	1.11059	0.30103	0	1	0	1
346	1	CALF	-39.79	-73.39	2	1	0.6	12.8	0	74	12	2	432	520	0.8	92.5	15	2.5	540	650	1.13988	0	0	1	0	1
347	1	CALF	-39.79	-73.39	2	1	0.42	11.1	0	74	12	2	432	520	0.8	92.5	15	2.5	540	650	1.08279	0	0	1	0	1
348	1	CALF	-39.79	-73.39	2	1	0.46	11.9	2	74	12	2	432	520	0.8	92.5	15	2.5	540	650	1.11059	0.477121	0	1	0	1
349	1	CALF	-39.79	-73.39	2	1	0.43	12.1	1	74	12	2	432	520	0.8	92.5	15	2.5	540	650	1.11727	0.30103	0	1	0	1
350	1	CALF	-39.79	-73.39	2	2	2.12	20	0	74	12	2	432	520	0.8	92.5	15	2.5	540	650	1.32222	0	0	1	0	1
351	1	CALF	-39.79	-73.39	2	2	1.98	18.5	1	74	12	2	432	520	0.8	92.5	15	2.5	540	650	1.29003	0.30103	0	1	0	1
352	1	CALF	-39.79	-73.39	2	3	4.83	25.3	2	74	12	2	432	520	0.8	92.5	15	2.5	540	650	1.41996	0.477121	0	1	0	1
353	1	CALF	-39.79	-73.39	2	3	3.52	23.5	1	74	12	2	432	520	0.8	92.5	15	2.5	540	650	1.38917	0.30103	0	1	0	1
354	1	CALF	-39.79	-73.39	2	3	3.84	24.6	3	74	12	2	432	520	0.8	92.5	15	2.5	540	650	1.40824	0.60206	0	1	0	1
355	1	CALF	-39.79	-73.39	2	3	2.8	21.7	1	74	12	2	432	520	0.8	92.5	15	2.5	540	650	1.35603	0.30103	0	1	0	1
356	2	CALF	-39.79	-73.39	2	1	0.39	11.4	0	74	12	2	432	520	0.8	92.5	15	2.5	540	650	1.09342	0	0	1	0	1
357	2	CALF	-39.79	-73.39	2	1	0.38	11.6	0	74	12	2	432	520	0.8	92.5	15	2.5	540	650	1.10037	0	0	1	0	1
358	2	CALF	-39.79	-73.39	2	1	0.26	10.3	2	74	12	2	432	520	0.8	92.5	15	2.5	540	650	1.05308	0.477121	0	1	0	1
359	2	CALF	-39.79	-73.39	2	1	0.42	12.3	2	74	12	2	432	520	0.8	92.5	15	2.5	540	650	1.12385	0.477121	0	1	0	1
360	2	CALF	-39.79	-73.39	2	1	0.58	13.5	2	74	12	2	432	520	0.8	92.5	15	2.5	540	650	1.16137	0.477121	0	1	0	1
361	2	CALF	-39.79	-73.39	2	1	0.55	13.4	2	74	12	2	432	520	0.8	92.5	15	2.5	540	650	1.15836	0.477121	0	1	0	1
362	2	CALF	-39.79	-73.39	2	1	0.46	12.7	1	74	12	2	432	520	0.8	92.5	15	2.5	540	650	1.13672	0.30103	0	1	0	1
363	2	CALF	-39.79	-73.39	2	1	0.62	14	3	74	12	2	432	520	0.8	92.5	15	2.5	540	650	1.17609	0.60206	0	1	0	1
364	2	CALF	-39.79	-73.39	2	3	1.83	19	0	74	12	2	432	520	0.8	92.5	15	2.5	540	650	1.30103	0	0	1	0	1
365	2	CALF	-39.79	-73.39	2	2	1.9	21.1	3	74	12	2	432	520	0.8	92.5	15	2.5	540	650	1.34439	0.60206	0	1	0	1
366	2	CALF	-39.79	-73.39	2	2	2.59	21.8	0	74	12	2	432	520	0.8	92.5	15	2.5	540	650	1.35793	0	0	1	0	1
367	2	CALF	-39.79	-73.39	2	2	3.42	23.9	1	74	12	2	432	520	0.8	92.5	15	2.5	540	650	1.3962	0.30103	0	1	0	1
368	2	CALF	-39.79	-73.39	2	2	2.25	21.5	2	74	12	2	432	520	0.8	92.5	15	2.5	540	650	1.35218	0.477121	0	1	0	1
369	2	CALF	-39.79	-73.39	2	2	1.89	20	3	74	12	2	432	520	0.8	92.5	15	2.5	540	650	1.32222	0.60206	0	1	0	1
370	2	CALF	-39.79	-73.39	2	3	1.77	19.3	2	74	12	2	432	520	0.8	92.5	15	2.5	540	650	1.3075	0.477121	0	1	0	1
371	2	CALF	-39.79	-73.39	2	2	1.66	19.4	1	74	12	2	432	520	0.8	92.5	15	2.5	540	650	1.30963	0.30103	0	1	0	1
372	2	CALF	-39.79	-73.39	2	3	2.32	21.4	2	74	12	2	432	520	0.8	92.5	15	2.5	540	650	1.35025	0.477121	0	1	0	1
373	2	CALF	-39.79	-73.39	2	3	4.57	24.9	4	74	12	2	432	520	0.8	92.5	15	2.5	540	650	1.4133	0.69897	0	1	0	1
374	2	CALF	-39.79	-73.39	2	2	3.59	25.3	0	74	12	2	432	520	0.8	92.5	15	2.5	540	650	1.41996	0	0	1	0	1
375	2	CALF	-39.79	-73.39	2	3	3.64	24.1	1	74	12	2	432	520	0.8	92.5	15	2.5	540	650	1.39967	0.30103	0	1	0	1
376	2	CALF	-39.79	-73.39	2	2	4.65	27.3	5	74	12	2	432	520	0.8	92.5	15	2.5	540	650	1.45179	0.778151	0	1	0	1
377	2	CALF	-39.79	-73.39	2	3	7.85	30.1	19	74	12	2	432	520	0.8	92.5	15	2.5	540	650	1.49276	1.30103	0	1	0	1
378	3	CALF	-39.79	-73.39	2	1	0.18	9.1	0	74	12	2	432	520	0.8	92.5	15	2.5	540	650	1.00432	0	0	1	0	1
379	3	CALF	-39.79	-73.39	2	1	0.56	12.6	3	74	12	2	432	520	0.8	92.5	15	2.5	540	650	1.13354	0.60206	0	1	0	1
380	3	CALF	-39.79	-73.39	2	1	0.48	11.2	0	74	12	2	432	520	0.8	92.5	15	2.5	540	650	1.08636	0	0	1	0	1
381	3	CALF	-39.79	-73.39	2	1	0.53	12.6	3	74	12	2	432	520	0.8	92.5	15	2.5	540	650	1.13354	0.60206	0	1	0	1
382	3	CALF	-39.79	-73.39	2	1	0.56	13.5	2	74	12	2	432	520	0.8	92.5	15	2.5	540	650	1.16137	0.477121	0	1	0	1
383	3	CALF	-39.79	-73.39	2	1	0.44	12.2	1	74	12	2	432	520	0.8	92.5	15	2.5	540	650	1.12057	0.30103	0	1	0	1
384	3	CALF	-39.79	-73.39	2	1	0.57	12.8	1	74	12	2	432	520	0.8	92.5	15	2.5	540	650	1.13988	0.30103	0	1	0	1
385	3	CALF	-39.79	-73.39	2	1	0.56	12.5	0	74	12	2	432	520	0.8	92.5	15	2.5	540	650	1.13033	0	0	1	0	1
386	3	CALF	-39.79	-73.39	2	3	4.64	25.6	0	74	12	2	432	520	0.8	92.5	15	2.5	540	650	1.42488	0	0	1	0	1
387	3	CALF	-39.79	-73.39	2	3	6.13	25.9	4	74	12	2	432	520	0.8	92.5	15	2.5	540	650	1.42975	0.69897	0	1	0	1
388	3	CALF	-39.79	-73.39	2	3	4.51	24.7	8	74	12	2	432	520	0.8	92.5	15	2.5	540	650	1.40993	0.954243	0	1	0	1
389	4	CALF	-39.79	-73.39	2	1	0.49	12.2	1	74	12	2	432	520	0.8	92.5	15	2.5	540	650	1.12057	0.30103	0	1	0	1
390	4	CALF	-39.79	-73.39	2	1	0.38	11.1	2	74	12	2	432	520	0.8	92.5	15	2.5	540	650	1.08279	0.477121	0	1	0	1
391	4	CALF	-39.79	-73.39	2	1	0.36	11.6	1	74	12	2	432	520	0.8	92.5	15	2.5	540	650	1.10037	0.30103	0	1	0	1
392	4	CALF	-39.79	-73.39	2	1	0.44	12.8	0	74	12	2	432	520	0.8	92.5	15	2.5	540	650	1.13988	0	0	1	0	1
393	4	CALF	-39.79	-73.39	2	2	1.62	17.7	6	74	12	2	432	520	0.8	92.5	15	2.5	540	650	1.27184	0.845098	0	1	0	1
394	4	CALF	-39.79	-73.39	2	2	1.43	17.5	1	74	12	2	432	520	0.8	92.5	15	2.5	540	650	1.26717	0.30103	0	1	0	1
395	4	CALF	-39.79	-73.39	2	2	1.74	18.6	2	74	12	2	432	520	0.8	92.5	15	2.5	540	650	1.29226	0.477121	0	1	0	1
396	4	CALF	-39.79	-73.39	2	2	1.91	19.2	0	74	12	2	432	520	0.8	92.5	15	2.5	540	650	1.30535	0	0	1	0	1
397	4	CALF	-39.79	-73.39	2	3	3	22.2	1	74	12	2	432	520	0.8	92.5	15	2.5	540	650	1.36549	0.30103	0	1	0	1
398	4	CALF	-39.79	-73.39	2	3	2	19.5	2	74	12	2	432	520	0.8	92.5	15	2.5	540	650	1.31175	0.477121	0	1	0	1
399	4	CALF	-39.79	-73.39	2	2	1.73	19.8	0	74	12	2	432	520	0.8	92.5	15	2.5	540	650	1.31806	0	0	1	0	1
400	4	CALF	-39.79	-73.39	2	3	6.29	27.2	4	74	12	2	432	520	0.8	92.5	15	2.5	540	650	1.45025	0.69897	0	1	0	1
401	4	CALF	-39.79	-73.39	2	3	6.29	29.2	6	74	12	2	432	520	0.8	92.5	15	2.5	540	650	1.48001	0.845098	0	1	0	1
402	1	CHAI	-39.94	-73.58	2	1	0.2	9.5	0	3	0	0	92	95	0.59	5.08475	0	0	155.932	161.017	1.02119	0	0	4	0	4
403	1	CHAI	-39.94	-73.58	2	1	0.16	8.4	0	3	0	0	92	95	0.59	5.08475	0	0	155.932	161.017	0.973128	0	0	4	0	4
404	1	CHAI	-39.94	-73.58	2	1	0.16	8.4	0	3	0	0	92	95	0.59	5.08475	0	0	155.932	161.017	0.973128	0	0	4	0	4
405	1	CHAI	-39.94	-73.58	2	1	0.19	9.4	0	3	0	0	92	95	0.59	5.08475	0	0	155.932	161.017	1.01703	0	0	4	0	4
406	1	CHAI	-39.94	-73.58	2	1	0.4	12.2	0	3	0	0	92	95	0.59	5.08475	0	0	155.932	161.017	1.12057	0	0	4	0	4
407	1	CHAI	-39.94	-73.58	2	1	0.19	9.3	0	3	0	0	92	95	0.59	5.08475	0	0	155.932	161.017	1.01284	0	0	4	0	4
408	1	CHAI	-39.94	-73.58	2	1	0.17	9.2	0	3	0	0	92	95	0.59	5.08475	0	0	155.932	161.017	1.0086	0	0	4	0	4
409	1	CHAI	-39.94	-73.58	2	1	0.14	8.8	0	3	0	0	92	95	0.59	5.08475	0	0	155.932	161.017	0.991226	0	0	4	0	4
410	1	CHAI	-39.94	-73.58	2	1	0.21	9.9	0	3	0	0	92	95	0.59	5.08475	0	0	155.932	161.017	1.03743	0	0	4	0	4
411	1	CHAI	-39.94	-73.58	2	1	0.32	11.7	0	3	0	0	92	95	0.59	5.08475	0	0	155.932	161.017	1.1038	0	0	4	0	4
412	1	CHAI	-39.94	-73.58	2	1	0.27	11	0	3	0	0	92	95	0.59	5.08475	0	0	155.932	161.017	1.07918	0	0	4	0	4
413	1	CHAI	-39.94	-73.58	2	1	0.12	8.4	0	3	0	0	92	95	0.59	5.08475	0	0	155.932	161.017	0.973128	0	0	4	0	4
414	1	CHAI	-39.94	-73.58	2	1	0.16	9.3	0	3	0	0	92	95	0.59	5.08475	0	0	155.932	161.017	1.01284	0	0	4	0	4
415	1	CHAI	-39.94	-73.58	2	1	0.45	13	0	3	0	0	92	95	0.59	5.08475	0	0	155.932	161.017	1.14613	0	0	4	0	4
416	1	CHAI	-39.94	-73.58	2	1	0.58	13.5	1	3	0	0	92	95	0.59	5.08475	0	0	155.932	161.017	1.16137	0.30103	0	4	0	4
417	1	CHAI	-39.94	-73.58	2	2	1.57	21.5	0	3	0	0	92	95	0.59	5.08475	0	0	155.932	161.017	1.35218	0	0	4	0	4
418	1	CHAI	-39.94	-73.58	2	1	0.68	14.4	2	3	0	0	92	95	0.59	5.08475	0	0	155.932	161.017	1.18752	0.477121	0	4	0	4
419	1	CHAI	-39.94	-73.58	2	2	1.71	19.9	0	3	0	0	92	95	0.59	5.08475	0	0	155.932	161.017	1.32015	0	0	4	0	4
420	1	CHAI	-39.94	-73.58	2	2	1.66	19.3	0	3	0	0	92	95	0.59	5.08475	0	0	155.932	161.017	1.3075	0	0	4	0	4
421	1	CHAI	-39.94	-73.58	2	2	5.49	27	5	3	0	0	92	95	0.59	5.08475	0	0	155.932	161.017	1.44716	0.778151	0	4	0	4
422	1	CHAI	-39.94	-73.58	2	1	0.21	9.8	0	3	0	0	92	95	0.59	5.08475	0	0	155.932	161.017	1.03342	0	0	4	0	4
423	1	CHAI	-39.94	-73.58	2	2	2.15	21	0	3	0	0	92	95	0.59	5.08475	0	0	155.932	161.017	1.34242	0	0	4	0	4
424	1	CHAI	-39.94	-73.58	2	2	3.54	23.7	1	3	0	0	92	95	0.59	5.08475	0	0	155.932	161.017	1.3927	0.30103	0	4	0	4
425	2	CHAI	-39.94	-73.58	2	1	0.13	8.8	0	3	0	0	92	95	0.59	5.08475	0	0	155.932	161.017	0.991226	0	0	4	0	4
426	2	CHAI	-39.94	-73.58	2	1	0.15	8.9	0	3	0	0	92	95	0.59	5.08475	0	0	155.932	161.017	0.995635	0	0	4	0	4
427	2	CHAI	-39.94	-73.58	2	1	0.13	9.2	0	3	0	0	92	95	0.59	5.08475	0	0	155.932	161.017	1.0086	0	0	4	0	4
428	2	CHAI	-39.94	-73.58	2	1	0.38	12.4	1	3	0	0	92	95	0.59	5.08475	0	0	155.932	161.017	1.1271	0.30103	0	4	0	4
429	2	CHAI	-39.94	-73.58	2	2	0.53	17.7	3	3	0	0	92	95	0.59	5.08475	0	0	155.932	161.017	1.27184	0.60206	0	4	0	4
430	2	CHAI	-39.94	-73.58	2	1	0.26	11.3	0	3	0	0	92	95	0.59	5.08475	0	0	155.932	161.017	1.08991	0	0	4	0	4
431	2	CHAI	-39.94	-73.58	2	1	0.12	8.8	0	3	0	0	92	95	0.59	5.08475	0	0	155.932	161.017	0.991226	0	0	4	0	4
432	2	CHAI	-39.94	-73.58	2	1	0.13	8.9	0	3	0	0	92	95	0.59	5.08475	0	0	155.932	161.017	0.995635	0	0	4	0	4
433	2	CHAI	-39.94	-73.58	2	1	0.11	8.5	0	3	0	0	92	95	0.59	5.08475	0	0	155.932	161.017	0.977724	0	0	4	0	4
434	2	CHAI	-39.94	-73.58	2	2	1.17	17.6	0	3	0	0	92	95	0.59	5.08475	0	0	155.932	161.017	1.26951	0	0	4	0	4
435	2	CHAI	-39.94	-73.58	2	2	1.56	19.5	1	3	0	0	92	95	0.59	5.08475	0	0	155.932	161.017	1.31175	0.30103	0	4	0	4
436	2	CHAI	-39.94	-73.58	2	2	1.5	19.4	0	3	0	0	92	95	0.59	5.08475	0	0	155.932	161.017	1.30963	0	0	4	0	4
437	2	CHAI	-39.94	-73.58	2	2	1.53	20	3	3	0	0	92	95	0.59	5.08475	0	0	155.932	161.017	1.32222	0.60206	0	4	0	4
438	2	CHAI	-39.94	-73.58	2	2	1.61	19.9	0	3	0	0	92	95	0.59	5.08475	0	0	155.932	161.017	1.32015	0	0	4	0	4
439	2	CHAI	-39.94	-73.58	2	2	1.25	18.4	0	3	0	0	92	95	0.59	5.08475	0	0	155.932	161.017	1.2878	0	0	4	0	4
440	2	CHAI	-39.94	-73.58	2	1	0.8	17.6	1	3	0	0	92	95	0.59	5.08475	0	0	155.932	161.017	1.26951	0.30103	0	4	0	4
441	2	CHAI	-39.94	-73.58	2	2	1.43	20.3	1	3	0	0	92	95	0.59	5.08475	0	0	155.932	161.017	1.32838	0.30103	0	4	0	4
442	3	CHAI	-39.94	-73.58	2	1	0.15	8.6	0	3	0	0	92	95	0.59	5.08475	0	0	155.932	161.017	0.982271	0	0	4	0	4
443	3	CHAI	-39.94	-73.58	2	1	0.51	12.7	1	3	0	0	92	95	0.59	5.08475	0	0	155.932	161.017	1.13672	0.30103	0	4	0	4
444	3	CHAI	-39.94	-73.58	2	1	0.16	9	0	3	0	0	92	95	0.59	5.08475	0	0	155.932	161.017	1	0	0	4	0	4
445	3	CHAI	-39.94	-73.58	2	1	0.15	8.5	0	3	0	0	92	95	0.59	5.08475	0	0	155.932	161.017	0.977724	0	0	4	0	4
446	3	CHAI	-39.94	-73.58	2	1	0.14	8.4	0	3	0	0	92	95	0.59	5.08475	0	0	155.932	161.017	0.973128	0	0	4	0	4
447	3	CHAI	-39.94	-73.58	2	1	0.22	10.1	0	3	0	0	92	95	0.59	5.08475	0	0	155.932	161.017	1.04532	0	0	4	0	4
448	3	CHAI	-39.94	-73.58	2	1	0.41	12.3	1	3	0	0	92	95	0.59	5.08475	0	0	155.932	161.017	1.12385	0.30103	0	4	0	4
449	3	CHAI	-39.94	-73.58	2	1	0.56	14.5	1	3	0	0	92	95	0.59	5.08475	0	0	155.932	161.017	1.19033	0.30103	0	4	0	4
450	4	CHAI	-39.94	-73.58	2	1	0.32	11.6	0	3	0	0	92	95	0.59	5.08475	0	0	155.932	161.017	1.10037	0	0	4	0	4
451	4	CHAI	-39.94	-73.58	2	1	0.42	12.4	1	3	0	0	92	95	0.59	5.08475	0	0	155.932	161.017	1.1271	0.30103	0	4	0	4
452	4	CHAI	-39.94	-73.58	2	1	0.25	11	0	3	0	0	92	95	0.59	5.08475	0	0	155.932	161.017	1.07918	0	0	4	0	4
453	4	CHAI	-39.94	-73.58	2	1	0.35	12.4	0	3	0	0	92	95	0.59	5.08475	0	0	155.932	161.017	1.1271	0	0	4	0	4
454	4	CHAI	-39.94	-73.58	2	2	1.79	19.7	0	3	0	0	92	95	0.59	5.08475	0	0	155.932	161.017	1.31597	0	0	4	0	4
455	4	CHAI	-39.94	-73.58	2	2	3.37	24.1	1	3	0	0	92	95	0.59	5.08475	0	0	155.932	161.017	1.39967	0.30103	0	4	0	4
456	4	CHAI	-39.94	-73.58	2	1	0.13	8.3	0	3	0	0	92	95	0.59	5.08475	0	0	155.932	161.017	0.968483	0	0	4	0	4
457	4	CHAI	-39.94	-73.58	2	1	0.17	8.9	0	3	0	0	92	95	0.59	5.08475	0	0	155.932	161.017	0.995635	0	0	4	0	4
458	4	CHAI	-39.94	-73.58	2	1	0.21	9.2	0	3	0	0	92	95	0.59	5.08475	0	0	155.932	161.017	1.0086	0	0	4	0	4
459	4	CHAI	-39.94	-73.58	2	1	0.15	8.9	0	3	0	0	92	95	0.59	5.08475	0	0	155.932	161.017	0.995635	0	0	4	0	4
460	4	CHAI	-39.94	-73.58	2	1	0.09	7.8	0	3	0	0	92	95	0.59	5.08475	0	0	155.932	161.017	0.944483	0	0	4	0	4
461	4	CHAI	-39.94	-73.58	2	1	0.17	9.2	0	3	0	0	92	95	0.59	5.08475	0	0	155.932	161.017	1.0086	0	0	4	0	4
462	1	CHEU	-39.4	-73.22	2	1	0.49	12.8	1	14	1	0	86	101	0.34	41.1765	2.94118	0	252.941	297.059	1.13988	0.30103	1	0	0	1
463	1	CHEU	-39.4	-73.22	2	1	0.54	13.3	2	14	1	0	86	101	0.34	41.1765	2.94118	0	252.941	297.059	1.15534	0.477121	1	0	0	1
464	1	CHEU	-39.4	-73.22	2	1	0.52	12.7	3	14	1	0	86	101	0.34	41.1765	2.94118	0	252.941	297.059	1.13672	0.60206	1	0	0	1
465	1	CHEU	-39.4	-73.22	2	1	0.57	13	2	14	1	0	86	101	0.34	41.1765	2.94118	0	252.941	297.059	1.14613	0.477121	1	0	0	1
466	1	CHEU	-39.4	-73.22	2	1	0.68	13.3	2	14	1	0	86	101	0.34	41.1765	2.94118	0	252.941	297.059	1.15534	0.477121	1	0	0	1
467	1	CHEU	-39.4	-73.22	2	1	0.49	12.7	1	14	1	0	86	101	0.34	41.1765	2.94118	0	252.941	297.059	1.13672	0.30103	1	0	0	1
468	1	CHEU	-39.4	-73.22	2	1	0.63	13.6	0	14	1	0	86	101	0.34	41.1765	2.94118	0	252.941	297.059	1.16435	0	1	0	0	1
469	1	CHEU	-39.4	-73.22	2	2	0.94	19.9	2	14	1	0	86	101	0.34	41.1765	2.94118	0	252.941	297.059	1.32015	0.477121	1	0	0	1
470	1	CHEU	-39.4	-73.22	2	1	0.5	13.4	1	14	1	0	86	101	0.34	41.1765	2.94118	0	252.941	297.059	1.15836	0.30103	1	0	0	1
471	1	CHEU	-39.4	-73.22	2	1	0.41	12.4	0	14	1	0	86	101	0.34	41.1765	2.94118	0	252.941	297.059	1.1271	0	1	0	0	1
472	1	CHEU	-39.4	-73.22	2	2	0.77	14.9	0	14	1	0	86	101	0.34	41.1765	2.94118	0	252.941	297.059	1.2014	0	1	0	0	1
473	1	CHEU	-39.4	-73.22	2	1	0.82	14.2	3	14	1	0	86	101	0.34	41.1765	2.94118	0	252.941	297.059	1.18184	0.60206	1	0	0	1
474	1	CHEU	-39.4	-73.22	2	3	2.95	22.1	5	14	1	0	86	101	0.34	41.1765	2.94118	0	252.941	297.059	1.36361	0.778151	1	0	0	1
475	1	CHEU	-39.4	-73.22	2	3	3.14	23	2	14	1	0	86	101	0.34	41.1765	2.94118	0	252.941	297.059	1.38021	0.477121	1	0	0	1
476	1	CHEU	-39.4	-73.22	2	2	2.81	22	4	14	1	0	86	101	0.34	41.1765	2.94118	0	252.941	297.059	1.36173	0.69897	1	0	0	1
477	1	CHEU	-39.4	-73.22	2	2	4.74	25.9	5	14	1	0	86	101	0.34	41.1765	2.94118	0	252.941	297.059	1.42975	0.778151	1	0	0	1
478	1	CHEU	-39.4	-73.22	2	3	2.91	21.9	2	14	1	0	86	101	0.34	41.1765	2.94118	0	252.941	297.059	1.35984	0.477121	1	0	0	1
479	1	CHEU	-39.4	-73.22	2	2	4.8	25.8	6	14	1	0	86	101	0.34	41.1765	2.94118	0	252.941	297.059	1.42813	0.845098	1	0	0	1
480	1	CHEU	-39.4	-73.22	2	3	2.23	21.3	1	14	1	0	86	101	0.34	41.1765	2.94118	0	252.941	297.059	1.3483	0.30103	1	0	0	1
481	1	CHEU	-39.4	-73.22	2	2	1.89	2.02	2	14	1	0	86	101	0.34	41.1765	2.94118	0	252.941	297.059	0.480007	0.477121	1	0	0	1
482	1	CHEU	-39.4	-73.22	2	2	2.52	21.4	2	14	1	0	86	101	0.34	41.1765	2.94118	0	252.941	297.059	1.35025	0.477121	1	0	0	1
483	1	CHEU	-39.4	-73.22	2	3	3.23	21.3	0	14	1	0	86	101	0.34	41.1765	2.94118	0	252.941	297.059	1.3483	0	1	0	0	1
484	1	CHEU	-39.4	-73.22	2	2	2.48	21.1	2	14	1	0	86	101	0.34	41.1765	2.94118	0	252.941	297.059	1.34439	0.477121	1	0	0	1
485	1	CHEU	-39.4	-73.22	2	3	2.46	20.6	2	14	1	0	86	101	0.34	41.1765	2.94118	0	252.941	297.059	1.33445	0.477121	1	0	0	1
486	1	CHEU	-39.4	-73.22	2	2	1.78	19.4	2	14	1	0	86	101	0.34	41.1765	2.94118	0	252.941	297.059	1.30963	0.477121	1	0	0	1
487	2	CHEU	-39.4	-73.22	2	1	0.58	12.8	0	14	1	0	86	101	0.34	41.1765	2.94118	0	252.941	297.059	1.13988	0	1	0	0	1
488	2	CHEU	-39.4	-73.22	2	1	0.28	9.7	0	14	1	0	86	101	0.34	41.1765	2.94118	0	252.941	297.059	1.02938	0	1	0	0	1
489	2	CHEU	-39.4	-73.22	2	1	0.5	12.4	0	14	1	0	86	101	0.34	41.1765	2.94118	0	252.941	297.059	1.1271	0	1	0	0	1
490	2	CHEU	-39.4	-73.22	2	1	0.84	14.1	2	14	1	0	86	101	0.34	41.1765	2.94118	0	252.941	297.059	1.17898	0.477121	1	0	0	1
491	2	CHEU	-39.4	-73.22	2	1	0.69	13.3	0	14	1	0	86	101	0.34	41.1765	2.94118	0	252.941	297.059	1.15534	0	1	0	0	1
492	2	CHEU	-39.4	-73.22	2	1	0.51	12.6	2	14	1	0	86	101	0.34	41.1765	2.94118	0	252.941	297.059	1.13354	0.477121	1	0	0	1
493	2	CHEU	-39.4	-73.22	2	1	0.58	12.2	3	14	1	0	86	101	0.34	41.1765	2.94118	0	252.941	297.059	1.12057	0.60206	1	0	0	1
494	2	CHEU	-39.4	-73.22	2	1	0.49	12.2	1	14	1	0	86	101	0.34	41.1765	2.94118	0	252.941	297.059	1.12057	0.30103	1	0	0	1
495	2	CHEU	-39.4	-73.22	2	1	0.52	12.8	0	14	1	0	86	101	0.34	41.1765	2.94118	0	252.941	297.059	1.13988	0	1	0	0	1
496	2	CHEU	-39.4	-73.22	2	1	0.48	12.4	0	14	1	0	86	101	0.34	41.1765	2.94118	0	252.941	297.059	1.1271	0	1	0	0	1
497	2	CHEU	-39.4	-73.22	2	2	2.64	21	3	14	1	0	86	101	0.34	41.1765	2.94118	0	252.941	297.059	1.34242	0.60206	1	0	0	1
498	2	CHEU	-39.4	-73.22	2	3	5.65	24.5	3	14	1	0	86	101	0.34	41.1765	2.94118	0	252.941	297.059	1.40654	0.60206	1	0	0	1
499	2	CHEU	-39.4	-73.22	2	2	3.57	23.7	8	14	1	0	86	101	0.34	41.1765	2.94118	0	252.941	297.059	1.3927	0.954243	1	0	0	1
500	2	CHEU	-39.4	-73.22	2	3	3.94	25.4	2	14	1	0	86	101	0.34	41.1765	2.94118	0	252.941	297.059	1.4216	0.477121	1	0	0	1
501	2	CHEU	-39.4	-73.22	2	2	2.76	22.2	5	14	1	0	86	101	0.34	41.1765	2.94118	0	252.941	297.059	1.36549	0.778151	1	0	0	1
502	2	CHEU	-39.4	-73.22	2	3	2.6	21.1	2	14	1	0	86	101	0.34	41.1765	2.94118	0	252.941	297.059	1.34439	0.477121	1	0	0	1
503	2	CHEU	-39.4	-73.22	2	2	2.34	21.1	1	14	1	0	86	101	0.34	41.1765	2.94118	0	252.941	297.059	1.34439	0.30103	1	0	0	1
504	2	CHEU	-39.4	-73.22	2	3	4.56	25.8	3	14	1	0	86	101	0.34	41.1765	2.94118	0	252.941	297.059	1.42813	0.60206	1	0	0	1
505	3	CHEU	-39.4	-73.22	2	3	5.82	30.8	7	14	1	0	86	101	0.34	41.1765	2.94118	0	252.941	297.059	1.50243	0.90309	1	0	0	1
506	3	CHEU	-39.4	-73.22	2	2	4.01	24.6	8	14	1	0	86	101	0.34	41.1765	2.94118	0	252.941	297.059	1.40824	0.954243	1	0	0	1
507	3	CHEU	-39.4	-73.22	2	2	2.31	20.9	1	14	1	0	86	101	0.34	41.1765	2.94118	0	252.941	297.059	1.34044	0.30103	1	0	0	1
508	3	CHEU	-39.4	-73.22	2	2	2.18	20.5	5	14	1	0	86	101	0.34	41.1765	2.94118	0	252.941	297.059	1.33244	0.778151	1	0	0	1
509	3	CHEU	-39.4	-73.22	2	2	2.26	20.9	1	14	1	0	86	101	0.34	41.1765	2.94118	0	252.941	297.059	1.34044	0.30103	1	0	0	1
510	3	CHEU	-39.4	-73.22	2	1	0.83	15.2	1	14	1	0	86	101	0.34	41.1765	2.94118	0	252.941	297.059	1.20952	0.30103	1	0	0	1
511	3	CHEU	-39.4	-73.22	2	1	0.62	13	1	14	1	0	86	101	0.34	41.1765	2.94118	0	252.941	297.059	1.14613	0.30103	1	0	0	1
512	3	CHEU	-39.4	-73.22	2	1	0.72	13.6	5	14	1	0	86	101	0.34	41.1765	2.94118	0	252.941	297.059	1.16435	0.778151	1	0	0	1
513	3	CHEU	-39.4	-73.22	2	1	0.53	13.1	1	14	1	0	86	101	0.34	41.1765	2.94118	0	252.941	297.059	1.14922	0.30103	1	0	0	1
514	3	CHEU	-39.4	-73.22	2	1	0.6	13.6	0	14	1	0	86	101	0.34	41.1765	2.94118	0	252.941	297.059	1.16435	0	1	0	0	1
515	3	CHEU	-39.4	-73.22	2	1	0.6	12.9	1	14	1	0	86	101	0.34	41.1765	2.94118	0	252.941	297.059	1.14301	0.30103	1	0	0	1
516	3	CHEU	-39.4	-73.22	2	1	0.58	13.4	2	14	1	0	86	101	0.34	41.1765	2.94118	0	252.941	297.059	1.15836	0.477121	1	0	0	1
517	3	CHEU	-39.4	-73.22	2	1	0.28	10.2	0	14	1	0	86	101	0.34	41.1765	2.94118	0	252.941	297.059	1.04922	0	1	0	0	1
518	3	CHEU	-39.4	-73.22	2	1	0.19	9.7	0	14	1	0	86	101	0.34	41.1765	2.94118	0	252.941	297.059	1.02938	0	1	0	0	1
519	4	CHEU	-39.4	-73.22	2	1	0.56	12.9	2	14	1	0	86	101	0.34	41.1765	2.94118	0	252.941	297.059	1.14301	0.477121	1	0	0	1
520	4	CHEU	-39.4	-73.22	2	1	0.29	10.3	0	14	1	0	86	101	0.34	41.1765	2.94118	0	252.941	297.059	1.05308	0	1	0	0	1
521	4	CHEU	-39.4	-73.22	2	1	0.44	12.2	2	14	1	0	86	101	0.34	41.1765	2.94118	0	252.941	297.059	1.12057	0.477121	1	0	0	1
522	4	CHEU	-39.4	-73.22	2	1	0.67	13.2	3	14	1	0	86	101	0.34	41.1765	2.94118	0	252.941	297.059	1.15229	0.60206	1	0	0	1
523	4	CHEU	-39.4	-73.22	2	1	0.5	11.9	0	14	1	0	86	101	0.34	41.1765	2.94118	0	252.941	297.059	1.11059	0	1	0	0	1
524	4	CHEU	-39.4	-73.22	2	1	0.78	13.5	0	14	1	0	86	101	0.34	41.1765	2.94118	0	252.941	297.059	1.16137	0	1	0	0	1
525	4	CHEU	-39.4	-73.22	2	1	0.86	14.4	2	14	1	0	86	101	0.34	41.1765	2.94118	0	252.941	297.059	1.18752	0.477121	1	0	0	1
526	4	CHEU	-39.4	-73.22	2	2	2.96	22.1	1	14	1	0	86	101	0.34	41.1765	2.94118	0	252.941	297.059	1.36361	0.30103	1	0	0	1
527	4	CHEU	-39.4	-73.22	2	1	0.73	13.3	4	14	1	0	86	101	0.34	41.1765	2.94118	0	252.941	297.059	1.15534	0.69897	1	0	0	1
528	4	CHEU	-39.4	-73.22	2	2	3.38	23.4	1	14	1	0	86	101	0.34	41.1765	2.94118	0	252.941	297.059	1.38739	0.30103	1	0	0	1
529	4	CHEU	-39.4	-73.22	2	2	4.12	24.1	4	14	1	0	86	101	0.34	41.1765	2.94118	0	252.941	297.059	1.39967	0.69897	1	0	0	1
530	4	CHEU	-39.4	-73.22	2	2	5.52	26.8	7	14	1	0	86	101	0.34	41.1765	2.94118	0	252.941	297.059	1.44404	0.90309	1	0	0	1
531	4	CHEU	-39.4	-73.22	2	2	3.01	22.8	0	14	1	0	86	101	0.34	41.1765	2.94118	0	252.941	297.059	1.37658	0	1	0	0	1
532	4	CHEU	-39.4	-73.22	2	2	2.54	20.9	4	14	1	0	86	101	0.34	41.1765	2.94118	0	252.941	297.059	1.34044	0.69897	1	0	0	1
533	1	CURI	-39.73	-73.39	2	1	0.22	9.3	0	135	0	0	713	848	0.92	146.739	0	0	775	921.739	1.01284	0	3	2	0	5
534	1	CURI	-39.73	-73.39	2	2	0.87	13.2	1	135	0	0	713	848	0.92	146.739	0	0	775	921.739	1.15229	0.30103	3	2	0	5
535	1	CURI	-39.73	-73.39	2	1	0.51	11.9	0	135	0	0	713	848	0.92	146.739	0	0	775	921.739	1.11059	0	3	2	0	5
536	1	CURI	-39.73	-73.39	2	2	1.88	19.1	1	135	0	0	713	848	0.92	146.739	0	0	775	921.739	1.3032	0.30103	3	2	0	5
537	1	CURI	-39.73	-73.39	2	2	1.92	19.4	5	135	0	0	713	848	0.92	146.739	0	0	775	921.739	1.30963	0.778151	3	2	0	5
538	1	CURI	-39.73	-73.39	2	3	5.49	27.1	2	135	0	0	713	848	0.92	146.739	0	0	775	921.739	1.44871	0.477121	3	2	0	5
539	1	CURI	-39.73	-73.39	2	3	4.22	21.7	2	135	0	0	713	848	0.92	146.739	0	0	775	921.739	1.35603	0.477121	3	2	0	5
540	1	CURI	-39.73	-73.39	2	3	4.33	22.8	0	135	0	0	713	848	0.92	146.739	0	0	775	921.739	1.37658	0	3	2	0	5
541	2	CURI	-39.73	-73.39	2	1	0.11	7.4	0	135	0	0	713	848	0.92	146.739	0	0	775	921.739	0.924279	0	3	2	0	5
542	2	CURI	-39.73	-73.39	2	1	0.37	12.2	1	135	0	0	713	848	0.92	146.739	0	0	775	921.739	1.12057	0.30103	3	2	0	5
543	2	CURI	-39.73	-73.39	2	1	0.41	13.1	1	135	0	0	713	848	0.92	146.739	0	0	775	921.739	1.14922	0.30103	3	2	0	5
544	2	CURI	-39.73	-73.39	2	1	0.18	8.3	0	135	0	0	713	848	0.92	146.739	0	0	775	921.739	0.968483	0	3	2	0	5
545	2	CURI	-39.73	-73.39	2	3	3.72	22.8	2	135	0	0	713	848	0.92	146.739	0	0	775	921.739	1.37658	0.477121	3	2	0	5
546	2	CURI	-39.73	-73.39	2	3	2.98	22.1	3	135	0	0	713	848	0.92	146.739	0	0	775	921.739	1.36361	0.60206	3	2	0	5
547	3	CURI	-39.73	-73.39	2	2	1.16	17.7	0	135	0	0	713	848	0.92	146.739	0	0	775	921.739	1.27184	0	3	2	0	5
548	3	CURI	-39.73	-73.39	2	1	0.46	12.8	2	135	0	0	713	848	0.92	146.739	0	0	775	921.739	1.13988	0.477121	3	2	0	5
549	3	CURI	-39.73	-73.39	2	2	0.75	14.8	2	135	0	0	713	848	0.92	146.739	0	0	775	921.739	1.19866	0.477121	3	2	0	5
550	3	CURI	-39.73	-73.39	2	2	1.84	18.9	1	135	0	0	713	848	0.92	146.739	0	0	775	921.739	1.29885	0.30103	3	2	0	5
551	3	CURI	-39.73	-73.39	2	2	3.05	23.1	3	135	0	0	713	848	0.92	146.739	0	0	775	921.739	1.38202	0.60206	3	2	0	5
552	3	CURI	-39.73	-73.39	2	3	2.77	23.1	6	135	0	0	713	848	0.92	146.739	0	0	775	921.739	1.38202	0.845098	3	2	0	5
553	3	CURI	-39.73	-73.39	2	3	5.6	26.2	8	135	0	0	713	848	0.92	146.739	0	0	775	921.739	1.43457	0.954243	3	2	0	5
554	3	CURI	-39.73	-73.39	2	3	4.9	23.8	4	135	0	0	713	848	0.92	146.739	0	0	775	921.739	1.39445	0.69897	3	2	0	5
555	4	CURI	-39.73	-73.39	2	1	0.16	8.8	0	135	0	0	713	848	0.92	146.739	0	0	775	921.739	0.991226	0	3	2	0	5
556	4	CURI	-39.73	-73.39	2	1	0.42	12.1	2	135	0	0	713	848	0.92	146.739	0	0	775	921.739	1.11727	0.477121	3	2	0	5
557	4	CURI	-39.73	-73.39	2	1	0.48	13.4	3	135	0	0	713	848	0.92	146.739	0	0	775	921.739	1.15836	0.60206	3	2	0	5
558	4	CURI	-39.73	-73.39	2	1	0.62	13.5	2	135	0	0	713	848	0.92	146.739	0	0	775	921.739	1.16137	0.477121	3	2	0	5
559	4	CURI	-39.73	-73.39	2	2	0.73	15.3	1	135	0	0	713	848	0.92	146.739	0	0	775	921.739	1.21219	0.30103	3	2	0	5
560	4	CURI	-39.73	-73.39	2	1	0.53	14.1	2	135	0	0	713	848	0.92	146.739	0	0	775	921.739	1.17898	0.477121	3	2	0	5
561	4	CURI	-39.73	-73.39	2	2	1.74	20.2	2	135	0	0	713	848	0.92	146.739	0	0	775	921.739	1.32634	0.477121	3	2	0	5
562	4	CURI	-39.73	-73.39	2	2	1.76	19.1	0	135	0	0	713	848	0.92	146.739	0	0	775	921.739	1.3032	0	3	2	0	5
563	4	CURI	-39.73	-73.39	2	3	3.32	21.9	0	135	0	0	713	848	0.92	146.739	0	0	775	921.739	1.35984	0	3	2	0	5
564	4	CURI	-39.73	-73.39	2	2	1.3	17.7	1	135	0	0	713	848	0.92	146.739	0	0	775	921.739	1.27184	0.30103	3	2	0	5
565	1	CALF	-39.79	-73.39	3	1	0.23	9.6	0	36	56	0	5	97	0.8	45	70	0	6.25	121.25	1.02531	0	0	0	0	0
566	1	CALF	-39.79	-73.39	3	1	0.22	10	0	36	56	0	5	97	0.8	45	70	0	6.25	121.25	1.04139	0	0	0	0	0
567	1	CALF	-39.79	-73.39	3	1	0.2	9.8	0	36	56	0	5	97	0.8	45	70	0	6.25	121.25	1.03342	0	0	0	0	0
568	1	CALF	-39.79	-73.39	3	1	0.45	12.9	0	36	56	0	5	97	0.8	45	70	0	6.25	121.25	1.14301	0	0	0	0	0
569	1	CALF	-39.79	-73.39	3	1	0.2	9.8	0	36	56	0	5	97	0.8	45	70	0	6.25	121.25	1.03342	0	0	0	0	0
570	1	CALF	-39.79	-73.39	3	1	0.46	12.7	2	36	56	0	5	97	0.8	45	70	0	6.25	121.25	1.13672	0.477121	0	0	0	0
571	1	CALF	-39.79	-73.39	3	1	0.46	12.4	1	36	56	0	5	97	0.8	45	70	0	6.25	121.25	1.1271	0.30103	0	0	0	0
572	1	CALF	-39.79	-73.39	3	1	0.4	12.2	1	36	56	0	5	97	0.8	45	70	0	6.25	121.25	1.12057	0.30103	0	0	0	0
573	1	CALF	-39.79	-73.39	3	1	0.47	12.9	3	36	56	0	5	97	0.8	45	70	0	6.25	121.25	1.14301	0.60206	0	0	0	0
574	1	CALF	-39.79	-73.39	3	1	0.3	11.7	2	36	56	0	5	97	0.8	45	70	0	6.25	121.25	1.1038	0.477121	0	0	0	0
575	1	CALF	-39.79	-73.39	3	1	0.45	12.7	0	36	56	0	5	97	0.8	45	70	0	6.25	121.25	1.13672	0	0	0	0	0
576	1	CALF	-39.79	-73.39	3	1	0.22	10.4	0	36	56	0	5	97	0.8	45	70	0	6.25	121.25	1.0569	0	0	0	0	0
577	1	CALF	-39.79	-73.39	3	1	0.63	14.2	1	36	56	0	5	97	0.8	45	70	0	6.25	121.25	1.18184	0.30103	0	0	0	0
578	1	CALF	-39.79	-73.39	3	1	0.33	11.3	0	36	56	0	5	97	0.8	45	70	0	6.25	121.25	1.08991	0	0	0	0	0
579	1	CALF	-39.79	-73.39	3	1	0.38	12.3	2	36	56	0	5	97	0.8	45	70	0	6.25	121.25	1.12385	0.477121	0	0	0	0
580	1	CALF	-39.79	-73.39	3	2	2.01	20.4	3	36	56	0	5	97	0.8	45	70	0	6.25	121.25	1.33041	0.60206	0	0	0	0
581	1	CALF	-39.79	-73.39	3	2	1.98	20.1	2	36	56	0	5	97	0.8	45	70	0	6.25	121.25	1.32428	0.477121	0	0	0	0
582	1	CALF	-39.79	-73.39	3	2	1.92	19.5	0	36	56	0	5	97	0.8	45	70	0	6.25	121.25	1.31175	0	0	0	0	0
583	1	CALF	-39.79	-73.39	3	2	1.86	19.8	1	36	56	0	5	97	0.8	45	70	0	6.25	121.25	1.31806	0.30103	0	0	0	0
584	1	CALF	-39.79	-73.39	3	2	1.83	19.9	2	36	56	0	5	97	0.8	45	70	0	6.25	121.25	1.32015	0.477121	0	0	0	0
585	1	CALF	-39.79	-73.39	3	2	1.97	20.2	0	36	56	0	5	97	0.8	45	70	0	6.25	121.25	1.32634	0	0	0	0	0
586	1	CALF	-39.79	-73.39	3	2	2.03	20.6	1	36	56	0	5	97	0.8	45	70	0	6.25	121.25	1.33445	0.30103	0	0	0	0
587	1	CALF	-39.79	-73.39	3	2	2.23	20.8	2	36	56	0	5	97	0.8	45	70	0	6.25	121.25	1.33846	0.477121	0	0	0	0
588	1	CALF	-39.79	-73.39	3	2	2.29	21.4	1	36	56	0	5	97	0.8	45	70	0	6.25	121.25	1.35025	0.30103	0	0	0	0
589	1	CALF	-39.79	-73.39	3	2	4.22	25.1	0	36	56	0	5	97	0.8	45	70	0	6.25	121.25	1.41664	0	0	0	0	0
590	2	CALF	-39.79	-73.39	3	1	0.21	9.8	0	36	56	0	5	97	0.8	45	70	0	6.25	121.25	1.03342	0	0	0	0	0
591	2	CALF	-39.79	-73.39	3	1	0.56	13.6	2	36	56	0	5	97	0.8	45	70	0	6.25	121.25	1.16435	0.477121	0	0	0	0
592	2	CALF	-39.79	-73.39	3	1	0.25	10.2	0	36	56	0	5	97	0.8	45	70	0	6.25	121.25	1.04922	0	0	0	0	0
593	2	CALF	-39.79	-73.39	3	1	0.2	9.8	0	36	56	0	5	97	0.8	45	70	0	6.25	121.25	1.03342	0	0	0	0	0
594	2	CALF	-39.79	-73.39	3	2	0.29	10.7	0	36	56	0	5	97	0.8	45	70	0	6.25	121.25	1.06819	0	0	0	0	0
595	2	CALF	-39.79	-73.39	3	1	0.37	11.8	1	36	56	0	5	97	0.8	45	70	0	6.25	121.25	1.10721	0.30103	0	0	0	0
596	2	CALF	-39.79	-73.39	3	1	0.44	12.4	1	36	56	0	5	97	0.8	45	70	0	6.25	121.25	1.1271	0.30103	0	0	0	0
597	2	CALF	-39.79	-73.39	3	1	0.49	13.2	2	36	56	0	5	97	0.8	45	70	0	6.25	121.25	1.15229	0.477121	0	0	0	0
598	2	CALF	-39.79	-73.39	3	1	0.2	9.6	0	36	56	0	5	97	0.8	45	70	0	6.25	121.25	1.02531	0	0	0	0	0
599	2	CALF	-39.79	-73.39	3	1	0.48	12.8	1	36	56	0	5	97	0.8	45	70	0	6.25	121.25	1.13988	0.30103	0	0	0	0
600	2	CALF	-39.79	-73.39	3	1	0.48	12.9	2	36	56	0	5	97	0.8	45	70	0	6.25	121.25	1.14301	0.477121	0	0	0	0
601	2	CALF	-39.79	-73.39	3	2	0.4	12.2	0	36	56	0	5	97	0.8	45	70	0	6.25	121.25	1.12057	0	0	0	0	0
602	2	CALF	-39.79	-73.39	3	1	0.95	15.6	0	36	56	0	5	97	0.8	45	70	0	6.25	121.25	1.22011	0	0	0	0	0
603	2	CALF	-39.79	-73.39	3	1	0.18	9.6	0	36	56	0	5	97	0.8	45	70	0	6.25	121.25	1.02531	0	0	0	0	0
604	2	CALF	-39.79	-73.39	3	1	0.21	9.8	0	36	56	0	5	97	0.8	45	70	0	6.25	121.25	1.03342	0	0	0	0	0
605	2	CALF	-39.79	-73.39	3	1	0.53	13.3	0	36	56	0	5	97	0.8	45	70	0	6.25	121.25	1.15534	0	0	0	0	0
606	2	CALF	-39.79	-73.39	3	2	2.25	21.3	1	36	56	0	5	97	0.8	45	70	0	6.25	121.25	1.3483	0.30103	0	0	0	0
607	2	CALF	-39.79	-73.39	3	2	1.82	19.5	3	36	56	0	5	97	0.8	45	70	0	6.25	121.25	1.31175	0.60206	0	0	0	0
608	2	CALF	-39.79	-73.39	3	3	2.64	22.2	0	36	56	0	5	97	0.8	45	70	0	6.25	121.25	1.36549	0	0	0	0	0
609	2	CALF	-39.79	-73.39	3	2	2.22	21.1	2	36	56	0	5	97	0.8	45	70	0	6.25	121.25	1.34439	0.477121	0	0	0	0
610	2	CALF	-39.79	-73.39	3	2	3.61	24.2	6	36	56	0	5	97	0.8	45	70	0	6.25	121.25	1.4014	0.845098	0	0	0	0
611	2	CALF	-39.79	-73.39	3	2	4.03	25.5	2	36	56	0	5	97	0.8	45	70	0	6.25	121.25	1.42325	0.477121	0	0	0	0
612	2	CALF	-39.79	-73.39	3	3	4.2	25.8	2	36	56	0	5	97	0.8	45	70	0	6.25	121.25	1.42813	0.477121	0	0	0	0
613	3	CALF	-39.79	-73.39	3	1	0.4	12.2	3	36	56	0	5	97	0.8	45	70	0	6.25	121.25	1.12057	0.60206	0	0	0	0
614	3	CALF	-39.79	-73.39	3	1	0.22	10	0	36	56	0	5	97	0.8	45	70	0	6.25	121.25	1.04139	0	0	0	0	0
615	3	CALF	-39.79	-73.39	3	1	0.19	9.5	0	36	56	0	5	97	0.8	45	70	0	6.25	121.25	1.02119	0	0	0	0	0
616	3	CALF	-39.79	-73.39	3	1	0.39	11.9	0	36	56	0	5	97	0.8	45	70	0	6.25	121.25	1.11059	0	0	0	0	0
617	3	CALF	-39.79	-73.39	3	1	0.41	12.5	1	36	56	0	5	97	0.8	45	70	0	6.25	121.25	1.13033	0.30103	0	0	0	0
618	3	CALF	-39.79	-73.39	3	1	0.46	12.6	0	36	56	0	5	97	0.8	45	70	0	6.25	121.25	1.13354	0	0	0	0	0
619	3	CALF	-39.79	-73.39	3	1	0.23	10.4	0	36	56	0	5	97	0.8	45	70	0	6.25	121.25	1.0569	0	0	0	0	0
620	3	CALF	-39.79	-73.39	3	1	0.39	11.8	0	36	56	0	5	97	0.8	45	70	0	6.25	121.25	1.10721	0	0	0	0	0
621	3	CALF	-39.79	-73.39	3	1	0.38	12.1	0	36	56	0	5	97	0.8	45	70	0	6.25	121.25	1.11727	0	0	0	0	0
622	3	CALF	-39.79	-73.39	3	1	0.44	12.1	1	36	56	0	5	97	0.8	45	70	0	6.25	121.25	1.11727	0.30103	0	0	0	0
623	3	CALF	-39.79	-73.39	3	1	0.22	10.1	0	36	56	0	5	97	0.8	45	70	0	6.25	121.25	1.04532	0	0	0	0	0
624	3	CALF	-39.79	-73.39	3	1	0.43	12.1	2	36	56	0	5	97	0.8	45	70	0	6.25	121.25	1.11727	0.477121	0	0	0	0
625	4	CALF	-39.79	-73.39	3	1	0.41	12.7	2	36	56	0	5	97	0.8	45	70	0	6.25	121.25	1.13672	0.477121	0	0	0	0
626	4	CALF	-39.79	-73.39	3	1	0.22	10.3	0	36	56	0	5	97	0.8	45	70	0	6.25	121.25	1.05308	0	0	0	0	0
627	4	CALF	-39.79	-73.39	3	1	0.81	15.2	1	36	56	0	5	97	0.8	45	70	0	6.25	121.25	1.20952	0.30103	0	0	0	0
628	4	CALF	-39.79	-73.39	3	2	1.81	19.8	1	36	56	0	5	97	0.8	45	70	0	6.25	121.25	1.31806	0.30103	0	0	0	0
629	4	CALF	-39.79	-73.39	3	2	2.59	22.3	0	36	56	0	5	97	0.8	45	70	0	6.25	121.25	1.36736	0	0	0	0	0
630	4	CALF	-39.79	-73.39	3	3	2.62	22	2	36	56	0	5	97	0.8	45	70	0	6.25	121.25	1.36173	0.477121	0	0	0	0
631	4	CALF	-39.79	-73.39	3	2	2.89	23.2	3	36	56	0	5	97	0.8	45	70	0	6.25	121.25	1.38382	0.60206	0	0	0	0
632	4	CALF	-39.79	-73.39	3	2	2.52	22.6	0	36	56	0	5	97	0.8	45	70	0	6.25	121.25	1.37291	0	0	0	0	0
633	4	CALF	-39.79	-73.39	3	2	4.03	24.9	3	36	56	0	5	97	0.8	45	70	0	6.25	121.25	1.4133	0.60206	0	0	0	0
634	4	CALF	-39.79	-73.39	3	3	3.79	24.4	2	36	56	0	5	97	0.8	45	70	0	6.25	121.25	1.40483	0.477121	0	0	0	0
635	4	CALF	-39.79	-73.39	3	2	3.52	24	1	36	56	0	5	97	0.8	45	70	0	6.25	121.25	1.39794	0.30103	0	0	0	0
636	4	CALF	-39.79	-73.39	3	3	6.78	29	11	36	56	0	5	97	0.8	45	70	0	6.25	121.25	1.47712	1.07918	0	0	0	0
637	1	CHAI	-39.94	-73.58	3	1	0.23	9.6	0	173	0	0	0	173	0.59	293.22	0	0	0	293.22	1.02531	0	1	1	0	2
638	1	CHAI	-39.94	-73.58	3	1	0.35	10.2	1	173	0	0	0	173	0.59	293.22	0	0	0	293.22	1.04922	0.30103	1	1	0	2
639	1	CHAI	-39.94	-73.58	3	2	1.99	20.6	2	173	0	0	0	173	0.59	293.22	0	0	0	293.22	1.33445	0.477121	1	1	0	2
640	1	CHAI	-39.94	-73.58	3	2	2.14	21.1	1	173	0	0	0	173	0.59	293.22	0	0	0	293.22	1.34439	0.30103	1	1	0	2
641	2	CHAI	-39.94	-73.58	3	1	0.44	12.4	0	173	0	0	0	173	0.59	293.22	0	0	0	293.22	1.1271	0	1	1	0	2
642	2	CHAI	-39.94	-73.58	3	2	1.83	19.1	0	173	0	0	0	173	0.59	293.22	0	0	0	293.22	1.3032	0	1	1	0	2
643	2	CHAI	-39.94	-73.58	3	2	2.31	21.7	1	173	0	0	0	173	0.59	293.22	0	0	0	293.22	1.35603	0.30103	1	1	0	2
644	3	CHAI	-39.94	-73.58	3	1	0.14	8.8	0	173	0	0	0	173	0.59	293.22	0	0	0	293.22	0.991226	0	1	1	0	2
645	3	CHAI	-39.94	-73.58	3	1	0.22	10.5	0	173	0	0	0	173	0.59	293.22	0	0	0	293.22	1.0607	0	1	1	0	2
646	3	CHAI	-39.94	-73.58	3	2	1.41	17.7	2	173	0	0	0	173	0.59	293.22	0	0	0	293.22	1.27184	0.477121	1	1	0	2
647	3	CHAI	-39.94	-73.58	3	2	4.47	25.1	2	173	0	0	0	173	0.59	293.22	0	0	0	293.22	1.41664	0.477121	1	1	0	2
648	4	CHAI	-39.94	-73.58	3	2	2.65	22.6	2	173	0	0	0	173	0.59	293.22	0	0	0	293.22	1.37291	0.477121	1	1	0	2
649	4	CHAI	-39.94	-73.58	3	2	1.98	20.3	1	173	0	0	0	173	0.59	293.22	0	0	0	293.22	1.32838	0.30103	1	1	0	2
650	4	CHAI	-39.94	-73.58	3	1	0.41	11.8	0	173	0	0	0	173	0.59	293.22	0	0	0	293.22	1.10721	0	1	1	0	2
651	4	CHAI	-39.94	-73.58	3	1	0.36	11.6	0	173	0	0	0	173	0.59	293.22	0	0	0	293.22	1.10037	0	1	1	0	2
652	1	CHEU	-39.4	-73.22	3	1	0.7	15.1	3	9	0	0	3	12	0.34	26.4706	0	0	8.82353	35.2941	1.20683	0.60206	0	0	0	0
653	1	CHEU	-39.4	-73.22	3	1	0.57	13.3	1	9	0	0	3	12	0.34	26.4706	0	0	8.82353	35.2941	1.15534	0.30103	0	0	0	0
654	1	CHEU	-39.4	-73.22	3	1	0.54	13.1	1	9	0	0	3	12	0.34	26.4706	0	0	8.82353	35.2941	1.14922	0.30103	0	0	0	0
655	2	CHEU	-39.4	-73.22	3	1	0.48	12.6	1	9	0	0	3	12	0.34	26.4706	0	0	8.82353	35.2941	1.13354	0.30103	0	0	0	0
656	2	CHEU	-39.4	-73.22	3	1	0.27	11.6	4	9	0	0	3	12	0.34	26.4706	0	0	8.82353	35.2941	1.10037	0.69897	0	0	0	0
657	2	CHEU	-39.4	-73.22	3	1	0.51	14.2	2	9	0	0	3	12	0.34	26.4706	0	0	8.82353	35.2941	1.18184	0.477121	0	0	0	0
658	2	CHEU	-39.4	-73.22	3	2	1.84	18.8	3	9	0	0	3	12	0.34	26.4706	0	0	8.82353	35.2941	1.29667	0.60206	0	0	0	0
659	2	CHEU	-39.4	-73.22	3	2	2.37	23.1	2	9	0	0	3	12	0.34	26.4706	0	0	8.82353	35.2941	1.38202	0.477121	0	0	0	0
660	2	CHEU	-39.4	-73.22	3	3	2.47	21.7	6	9	0	0	3	12	0.34	26.4706	0	0	8.82353	35.2941	1.35603	0.845098	0	0	0	0
661	3	CHEU	-39.4	-73.22	3	1	0.85	16.1	1	9	0	0	3	12	0.34	26.4706	0	0	8.82353	35.2941	1.233	0.30103	0	0	0	0
662	3	CHEU	-39.4	-73.22	3	1	0.75	14.8	0	9	0	0	3	12	0.34	26.4706	0	0	8.82353	35.2941	1.19866	0	0	0	0	0
663	3	CHEU	-39.4	-73.22	3	1	0.39	13.3	1	9	0	0	3	12	0.34	26.4706	0	0	8.82353	35.2941	1.15534	0.30103	0	0	0	0
664	3	CHEU	-39.4	-73.22	3	1	0.54	13.3	2	9	0	0	3	12	0.34	26.4706	0	0	8.82353	35.2941	1.15534	0.477121	0	0	0	0
665	3	CHEU	-39.4	-73.22	3	1	0.25	10.3	1	9	0	0	3	12	0.34	26.4706	0	0	8.82353	35.2941	1.05308	0.30103	0	0	0	0
666	3	CHEU	-39.4	-73.22	3	1	0.37	12.2	1	9	0	0	3	12	0.34	26.4706	0	0	8.82353	35.2941	1.12057	0.30103	0	0	0	0
667	3	CHEU	-39.4	-73.22	3	2	2.6	22.9	2	9	0	0	3	12	0.34	26.4706	0	0	8.82353	35.2941	1.3784	0.477121	0	0	0	0
668	3	CHEU	-39.4	-73.22	3	2	1.97	20.4	2	9	0	0	3	12	0.34	26.4706	0	0	8.82353	35.2941	1.33041	0.477121	0	0	0	0
669	3	CHEU	-39.4	-73.22	3	2	2.1	20.9	3	9	0	0	3	12	0.34	26.4706	0	0	8.82353	35.2941	1.34044	0.60206	0	0	0	0
670	4	CHEU	-39.4	-73.22	3	2	0.52	13.6	0	9	0	0	3	12	0.34	26.4706	0	0	8.82353	35.2941	1.16435	0	0	0	0	0
671	4	CHEU	-39.4	-73.22	3	1	0.51	13.3	1	9	0	0	3	12	0.34	26.4706	0	0	8.82353	35.2941	1.15534	0.30103	0	0	0	0
672	4	CHEU	-39.4	-73.22	3	1	0.2	9.7	0	9	0	0	3	12	0.34	26.4706	0	0	8.82353	35.2941	1.02938	0	0	0	0	0
673	4	CHEU	-39.4	-73.22	3	1	0.18	9.7	0	9	0	0	3	12	0.34	26.4706	0	0	8.82353	35.2941	1.02938	0	0	0	0	0
674	4	CHEU	-39.4	-73.22	3	1	0.5	13.3	0	9	0	0	3	12	0.34	26.4706	0	0	8.82353	35.2941	1.15534	0	0	0	0	0
675	4	CHEU	-39.4	-73.22	3	2	0.36	12.5	0	9	0	0	3	12	0.34	26.4706	0	0	8.82353	35.2941	1.13033	0	0	0	0	0
676	4	CHEU	-39.4	-73.22	3	2	0.58	13.8	0	9	0	0	3	12	0.34	26.4706	0	0	8.82353	35.2941	1.17026	0	0	0	0	0
677	4	CHEU	-39.4	-73.22	3	1	0.4	13.3	5	9	0	0	3	12	0.34	26.4706	0	0	8.82353	35.2941	1.15534	0.778151	0	0	0	0
678	4	CHEU	-39.4	-73.22	3	2	2.47	22.3	5	9	0	0	3	12	0.34	26.4706	0	0	8.82353	35.2941	1.36736	0.778151	0	0	0	0
679	4	CHEU	-39.4	-73.22	3	3	4.19	25.1	5	9	0	0	3	12	0.34	26.4706	0	0	8.82353	35.2941	1.41664	0.778151	0	0	0	0
680	4	CHEU	-39.4	-73.22	3	3	2.44	22.4	6	9	0	0	3	12	0.34	26.4706	0	0	8.82353	35.2941	1.36922	0.845098	0	0	0	0
681	1	CURI	-39.73	-73.39	3	1	0.13	8.3	0	67	19	0	26	112	0.92	72.8261	20.6522	0	28.2609	121.739	0.968483	0	4	2	0	6
682	1	CURI	-39.73	-73.39	3	1	0.15	8.7	0	67	19	0	26	112	0.92	72.8261	20.6522	0	28.2609	121.739	0.986772	0	4	2	0	6
683	1	CURI	-39.73	-73.39	3	1	0.17	9.5	0	67	19	0	26	112	0.92	72.8261	20.6522	0	28.2609	121.739	1.02119	0	4	2	0	6
684	1	CURI	-39.73	-73.39	3	1	0.08	7.2	0	67	19	0	26	112	0.92	72.8261	20.6522	0	28.2609	121.739	0.913814	0	4	2	0	6
685	1	CURI	-39.73	-73.39	3	1	0.22	10.4	0	67	19	0	26	112	0.92	72.8261	20.6522	0	28.2609	121.739	1.0569	0	4	2	0	6
686	1	CURI	-39.73	-73.39	3	1	0.23	10.3	0	67	19	0	26	112	0.92	72.8261	20.6522	0	28.2609	121.739	1.05308	0	4	2	0	6
687	1	CURI	-39.73	-73.39	3	1	0.16	9.1	0	67	19	0	26	112	0.92	72.8261	20.6522	0	28.2609	121.739	1.00432	0	4	2	0	6
688	1	CURI	-39.73	-73.39	3	1	0.14	8.8	0	67	19	0	26	112	0.92	72.8261	20.6522	0	28.2609	121.739	0.991226	0	4	2	0	6
689	1	CURI	-39.73	-73.39	3	1	0.07	7.2	0	67	19	0	26	112	0.92	72.8261	20.6522	0	28.2609	121.739	0.913814	0	4	2	0	6
690	1	CURI	-39.73	-73.39	3	1	0.36	11.9	0	67	19	0	26	112	0.92	72.8261	20.6522	0	28.2609	121.739	1.11059	0	4	2	0	6
691	1	CURI	-39.73	-73.39	3	1	0.36	12	2	67	19	0	26	112	0.92	72.8261	20.6522	0	28.2609	121.739	1.11394	0.477121	4	2	0	6
692	1	CURI	-39.73	-73.39	3	1	0.26	11.4	0	67	19	0	26	112	0.92	72.8261	20.6522	0	28.2609	121.739	1.09342	0	4	2	0	6
693	1	CURI	-39.73	-73.39	3	1	0.51	13.1	2	67	19	0	26	112	0.92	72.8261	20.6522	0	28.2609	121.739	1.14922	0.477121	4	2	0	6
694	1	CURI	-39.73	-73.39	3	1	0.72	16.1	0	67	19	0	26	112	0.92	72.8261	20.6522	0	28.2609	121.739	1.233	0	4	2	0	6
695	1	CURI	-39.73	-73.39	3	2	1.82	20.3	1	67	19	0	26	112	0.92	72.8261	20.6522	0	28.2609	121.739	1.32838	0.30103	4	2	0	6
696	1	CURI	-39.73	-73.39	3	2	1.61	19.1	0	67	19	0	26	112	0.92	72.8261	20.6522	0	28.2609	121.739	1.3032	0	4	2	0	6
697	1	CURI	-39.73	-73.39	3	2	2.35	21.7	1	67	19	0	26	112	0.92	72.8261	20.6522	0	28.2609	121.739	1.35603	0.30103	4	2	0	6
698	1	CURI	-39.73	-73.39	3	2	3.4	24.7	3	67	19	0	26	112	0.92	72.8261	20.6522	0	28.2609	121.739	1.40993	0.60206	4	2	0	6
699	2	CURI	-39.73	-73.39	3	1	0.3	11.5	1	67	19	0	26	112	0.92	72.8261	20.6522	0	28.2609	121.739	1.09691	0.30103	4	2	0	6
700	2	CURI	-39.73	-73.39	3	1	0.14	8.9	1	67	19	0	26	112	0.92	72.8261	20.6522	0	28.2609	121.739	0.995635	0.30103	4	2	0	6
701	2	CURI	-39.73	-73.39	3	1	0.38	12.2	1	67	19	0	26	112	0.92	72.8261	20.6522	0	28.2609	121.739	1.12057	0.30103	4	2	0	6
702	2	CURI	-39.73	-73.39	3	1	0.2	10	1	67	19	0	26	112	0.92	72.8261	20.6522	0	28.2609	121.739	1.04139	0.30103	4	2	0	6
703	2	CURI	-39.73	-73.39	3	1	0.17	9.6	0	67	19	0	26	112	0.92	72.8261	20.6522	0	28.2609	121.739	1.02531	0	4	2	0	6
704	2	CURI	-39.73	-73.39	3	1	0.21	10.3	0	67	19	0	26	112	0.92	72.8261	20.6522	0	28.2609	121.739	1.05308	0	4	2	0	6
705	2	CURI	-39.73	-73.39	3	1	0.4	12.4	1	67	19	0	26	112	0.92	72.8261	20.6522	0	28.2609	121.739	1.1271	0.30103	4	2	0	6
706	2	CURI	-39.73	-73.39	3	1	0.46	13.3	1	67	19	0	26	112	0.92	72.8261	20.6522	0	28.2609	121.739	1.15534	0.30103	4	2	0	6
707	2	CURI	-39.73	-73.39	3	1	0.08	9.2	0	67	19	0	26	112	0.92	72.8261	20.6522	0	28.2609	121.739	1.0086	0	4	2	0	6
708	2	CURI	-39.73	-73.39	3	1	0.1	8.6	0	67	19	0	26	112	0.92	72.8261	20.6522	0	28.2609	121.739	0.982271	0	4	2	0	6
709	2	CURI	-39.73	-73.39	3	1	0.25	12	1	67	19	0	26	112	0.92	72.8261	20.6522	0	28.2609	121.739	1.11394	0.30103	4	2	0	6
710	2	CURI	-39.73	-73.39	3	2	1.3	18.4	1	67	19	0	26	112	0.92	72.8261	20.6522	0	28.2609	121.739	1.2878	0.30103	4	2	0	6
711	2	CURI	-39.73	-73.39	3	2	1.67	19.8	0	67	19	0	26	112	0.92	72.8261	20.6522	0	28.2609	121.739	1.31806	0	4	2	0	6
712	2	CURI	-39.73	-73.39	3	2	1.47	19.3	0	67	19	0	26	112	0.92	72.8261	20.6522	0	28.2609	121.739	1.3075	0	4	2	0	6
713	2	CURI	-39.73	-73.39	3	2	1.24	18.6	2	67	19	0	26	112	0.92	72.8261	20.6522	0	28.2609	121.739	1.29226	0.477121	4	2	0	6
714	3	CURI	-39.73	-73.39	3	1	0.17	9.3	0	67	19	0	26	112	0.92	72.8261	20.6522	0	28.2609	121.739	1.01284	0	4	2	0	6
715	3	CURI	-39.73	-73.39	3	1	0.19	9.6	0	67	19	0	26	112	0.92	72.8261	20.6522	0	28.2609	121.739	1.02531	0	4	2	0	6
716	3	CURI	-39.73	-73.39	3	1	0.17	8.9	0	67	19	0	26	112	0.92	72.8261	20.6522	0	28.2609	121.739	0.995635	0	4	2	0	6
717	3	CURI	-39.73	-73.39	3	1	0.2	9.6	0	67	19	0	26	112	0.92	72.8261	20.6522	0	28.2609	121.739	1.02531	0	4	2	0	6
718	3	CURI	-39.73	-73.39	3	1	0.25	10.3	0	67	19	0	26	112	0.92	72.8261	20.6522	0	28.2609	121.739	1.05308	0	4	2	0	6
719	3	CURI	-39.73	-73.39	3	1	0.11	7.3	0	67	19	0	26	112	0.92	72.8261	20.6522	0	28.2609	121.739	0.919078	0	4	2	0	6
720	3	CURI	-39.73	-73.39	3	1	0.16	8.4	0	67	19	0	26	112	0.92	72.8261	20.6522	0	28.2609	121.739	0.973128	0	4	2	0	6
721	3	CURI	-39.73	-73.39	3	1	0.22	8.9	0	67	19	0	26	112	0.92	72.8261	20.6522	0	28.2609	121.739	0.995635	0	4	2	0	6
722	3	CURI	-39.73	-73.39	3	1	0.15	8.8	0	67	19	0	26	112	0.92	72.8261	20.6522	0	28.2609	121.739	0.991226	0	4	2	0	6
723	3	CURI	-39.73	-73.39	3	1	0.25	8.8	0	67	19	0	26	112	0.92	72.8261	20.6522	0	28.2609	121.739	0.991226	0	4	2	0	6
724	3	CURI	-39.73	-73.39	3	1	0.19	9.2	0	67	19	0	26	112	0.92	72.8261	20.6522	0	28.2609	121.739	1.0086	0	4	2	0	6
725	3	CURI	-39.73	-73.39	3	1	0.22	10	0	67	19	0	26	112	0.92	72.8261	20.6522	0	28.2609	121.739	1.04139	0	4	2	0	6
726	3	CURI	-39.73	-73.39	3	1	0.11	7.8	0	67	19	0	26	112	0.92	72.8261	20.6522	0	28.2609	121.739	0.944483	0	4	2	0	6
727	3	CURI	-39.73	-73.39	3	1	0.3	11.1	0	67	19	0	26	112	0.92	72.8261	20.6522	0	28.2609	121.739	1.08279	0	4	2	0	6
728	3	CURI	-39.73	-73.39	3	1	0.35	11.8	1	67	19	0	26	112	0.92	72.8261	20.6522	0	28.2609	121.739	1.10721	0.30103	4	2	0	6
729	3	CURI	-39.73	-73.39	3	1	0.35	11.8	0	67	19	0	26	112	0.92	72.8261	20.6522	0	28.2609	121.739	1.10721	0	4	2	0	6
730	3	CURI	-39.73	-73.39	3	1	0.38	11.6	0	67	19	0	26	112	0.92	72.8261	20.6522	0	28.2609	121.739	1.10037	0	4	2	0	6
731	3	CURI	-39.73	-73.39	3	1	0.35	11.3	0	67	19	0	26	112	0.92	72.8261	20.6522	0	28.2609	121.739	1.08991	0	4	2	0	6
732	3	CURI	-39.73	-73.39	3	1	0.36	11.7	0	67	19	0	26	112	0.92	72.8261	20.6522	0	28.2609	121.739	1.1038	0	4	2	0	6
733	3	CURI	-39.73	-73.39	3	1	0.32	11.1	1	67	19	0	26	112	0.92	72.8261	20.6522	0	28.2609	121.739	1.08279	0.30103	4	2	0	6
734	3	CURI	-39.73	-73.39	3	1	0.46	12.7	2	67	19	0	26	112	0.92	72.8261	20.6522	0	28.2609	121.739	1.13672	0.477121	4	2	0	6
735	3	CURI	-39.73	-73.39	3	1	0.57	13.5	0	67	19	0	26	112	0.92	72.8261	20.6522	0	28.2609	121.739	1.16137	0	4	2	0	6
736	3	CURI	-39.73	-73.39	3	1	0.55	12.6	4	67	19	0	26	112	0.92	72.8261	20.6522	0	28.2609	121.739	1.13354	0.69897	4	2	0	6
737	3	CURI	-39.73	-73.39	3	1	0.53	13	1	67	19	0	26	112	0.92	72.8261	20.6522	0	28.2609	121.739	1.14613	0.30103	4	2	0	6
738	3	CURI	-39.73	-73.39	3	1	0.56	13.9	1	67	19	0	26	112	0.92	72.8261	20.6522	0	28.2609	121.739	1.17319	0.30103	4	2	0	6
739	3	CURI	-39.73	-73.39	3	1	0.52	13.3	1	67	19	0	26	112	0.92	72.8261	20.6522	0	28.2609	121.739	1.15534	0.30103	4	2	0	6
740	3	CURI	-39.73	-73.39	3	1	0.66	13.7	1	67	19	0	26	112	0.92	72.8261	20.6522	0	28.2609	121.739	1.16732	0.30103	4	2	0	6
741	3	CURI	-39.73	-73.39	3	1	0.41	12.3	1	67	19	0	26	112	0.92	72.8261	20.6522	0	28.2609	121.739	1.12385	0.30103	4	2	0	6
742	3	CURI	-39.73	-73.39	3	2	0.66	13.9	3	67	19	0	26	112	0.92	72.8261	20.6522	0	28.2609	121.739	1.17319	0.60206	4	2	0	6
743	3	CURI	-39.73	-73.39	3	1	0.33	11.8	1	67	19	0	26	112	0.92	72.8261	20.6522	0	28.2609	121.739	1.10721	0.30103	4	2	0	6
744	3	CURI	-39.73	-73.39	3	1	0.78	15.4	1	67	19	0	26	112	0.92	72.8261	20.6522	0	28.2609	121.739	1.21484	0.30103	4	2	0	6
745	3	CURI	-39.73	-73.39	3	2	1.24	17.9	1	67	19	0	26	112	0.92	72.8261	20.6522	0	28.2609	121.739	1.27646	0.30103	4	2	0	6
746	3	CURI	-39.73	-73.39	3	2	2.1	20.7	2	67	19	0	26	112	0.92	72.8261	20.6522	0	28.2609	121.739	1.33646	0.477121	4	2	0	6
747	3	CURI	-39.73	-73.39	3	2	1.71	19.4	2	67	19	0	26	112	0.92	72.8261	20.6522	0	28.2609	121.739	1.30963	0.477121	4	2	0	6
748	3	CURI	-39.73	-73.39	3	2	1.72	19.8	1	67	19	0	26	112	0.92	72.8261	20.6522	0	28.2609	121.739	1.31806	0.30103	4	2	0	6
749	3	CURI	-39.73	-73.39	3	2	1.9	20.2	0	67	19	0	26	112	0.92	72.8261	20.6522	0	28.2609	121.739	1.32634	0	4	2	0	6
750	3	CURI	-39.73	-73.39	3	2	1.47	18.6	2	67	19	0	26	112	0.92	72.8261	20.6522	0	28.2609	121.739	1.29226	0.477121	4	2	0	6
751	3	CURI	-39.73	-73.39	3	2	1.83	20.2	1	67	19	0	26	112	0.92	72.8261	20.6522	0	28.2609	121.739	1.32634	0.30103	4	2	0	6
752	3	CURI	-39.73	-73.39	3	3	2.13	20.1	0	67	19	0	26	112	0.92	72.8261	20.6522	0	28.2609	121.739	1.32428	0	4	2	0	6
753	3	CURI	-39.73	-73.39	3	2	4.57	26.9	6	67	19	0	26	112	0.92	72.8261	20.6522	0	28.2609	121.739	1.4456	0.845098	4	2	0	6
754	4	CURI	-39.73	-73.39	3	1	0.11	8.8	0	67	19	0	26	112	0.92	72.8261	20.6522	0	28.2609	121.739	0.991226	0	4	2	0	6
755	4	CURI	-39.73	-73.39	3	1	0.28	11.1	0	67	19	0	26	112	0.92	72.8261	20.6522	0	28.2609	121.739	1.08279	0	4	2	0	6
756	4	CURI	-39.73	-73.39	3	1	0.23	11.1	0	67	19	0	26	112	0.92	72.8261	20.6522	0	28.2609	121.739	1.08279	0	4	2	0	6
757	4	CURI	-39.73	-73.39	3	1	0.16	9.1	0	67	19	0	26	112	0.92	72.8261	20.6522	0	28.2609	121.739	1.00432	0	4	2	0	6
758	4	CURI	-39.73	-73.39	3	1	0.15	9.7	0	67	19	0	26	112	0.92	72.8261	20.6522	0	28.2609	121.739	1.02938	0	4	2	0	6
759	4	CURI	-39.73	-73.39	3	1	0.4	12.5	0	67	19	0	26	112	0.92	72.8261	20.6522	0	28.2609	121.739	1.13033	0	4	2	0	6
760	4	CURI	-39.73	-73.39	3	1	0.36	12.1	2	67	19	0	26	112	0.92	72.8261	20.6522	0	28.2609	121.739	1.11727	0.477121	4	2	0	6
761	4	CURI	-39.73	-73.39	3	1	0.08	8	0	67	19	0	26	112	0.92	72.8261	20.6522	0	28.2609	121.739	0.954243	0	4	2	0	6
762	4	CURI	-39.73	-73.39	3	1	0.41	12.9	1	67	19	0	26	112	0.92	72.8261	20.6522	0	28.2609	121.739	1.14301	0.30103	4	2	0	6
763	4	CURI	-39.73	-73.39	3	1	0.82	15.2	2	67	19	0	26	112	0.92	72.8261	20.6522	0	28.2609	121.739	1.20952	0.477121	4	2	0	6
764	4	CURI	-39.73	-73.39	3	1	0.51	13.7	1	67	19	0	26	112	0.92	72.8261	20.6522	0	28.2609	121.739	1.16732	0.30103	4	2	0	6
765	4	CURI	-39.73	-73.39	3	2	2.3	21.3	1	67	19	0	26	112	0.92	72.8261	20.6522	0	28.2609	121.739	1.3483	0.30103	4	2	0	6
766	4	CURI	-39.73	-73.39	3	2	3.61	24.5	6	67	19	0	26	112	0.92	72.8261	20.6522	0	28.2609	121.739	1.40654	0.845098	4	2	0	6
767	4	CURI	-39.73	-73.39	3	2	2.24	21.4	0	67	19	0	26	112	0.92	72.8261	20.6522	0	28.2609	121.739	1.35025	0	4	2	0	6
768	4	CURI	-39.73	-73.39	3	2	1.99	20.5	1	67	19	0	26	112	0.92	72.8261	20.6522	0	28.2609	121.739	1.33244	0.30103	4	2	0	6
769	4	CURI	-39.73	-73.39	3	2	1.57	18.8	0	67	19	0	26	112	0.92	72.8261	20.6522	0	28.2609	121.739	1.29667	0	4	2	0	6
770	4	CURI	-39.73	-73.39	3	2	1.31	18.2	0	67	19	0	26	112	0.92	72.8261	20.6522	0	28.2609	121.739	1.2833	0	4	2	0	6
771	4	CURI	-39.73	-73.39	3	2	3.32	24.2	2	67	19	0	26	112	0.92	72.8261	20.6522	0	28.2609	121.739	1.4014	0.477121	4	2	0	6
772	4	CURI	-39.73	-73.39	3	3	2.61	23.2	2	67	19	0	26	112	0.92	72.8261	20.6522	0	28.2609	121.739	1.38382	0.477121	4	2	0	6
773	4	CURI	-39.73	-73.39	3	3	2.7	21.7	2	67	19	0	26	112	0.92	72.8261	20.6522	0	28.2609	121.739	1.35603	0.477121	4	2	0	6
774	1	CALF	-39.79	-73.39	4	1	0.45	12.1	1	31	110	0	17	158	0.8	38.75	137.5	0	21.25	197.5	1.11727	0.30103	5	3	0	8
775	1	CALF	-39.79	-73.39	4	1	0.27	9.7	0	31	110	0	17	158	0.8	38.75	137.5	0	21.25	197.5	1.02938	0	5	3	0	8
776	1	CALF	-39.79	-73.39	4	1	0.4	11.6	2	31	110	0	17	158	0.8	38.75	137.5	0	21.25	197.5	1.10037	0.477121	5	3	0	8
777	1	CALF	-39.79	-73.39	4	1	0.58	12.3	1	31	110	0	17	158	0.8	38.75	137.5	0	21.25	197.5	1.12385	0.30103	5	3	0	8
778	1	CALF	-39.79	-73.39	4	1	0.72	14	1	31	110	0	17	158	0.8	38.75	137.5	0	21.25	197.5	1.17609	0.30103	5	3	0	8
779	2	CALF	-39.79	-73.39	4	1	0.51	11.9	0	31	110	0	17	158	0.8	38.75	137.5	0	21.25	197.5	1.11059	0	5	3	0	8
780	2	CALF	-39.79	-73.39	4	1	0.26	8.8	0	31	110	0	17	158	0.8	38.75	137.5	0	21.25	197.5	0.991226	0	5	3	0	8
781	2	CALF	-39.79	-73.39	4	2	2.68	20.6	0	31	110	0	17	158	0.8	38.75	137.5	0	21.25	197.5	1.33445	0	5	3	0	8
782	3	CALF	-39.79	-73.39	4	1	0.56	12.6	2	31	110	0	17	158	0.8	38.75	137.5	0	21.25	197.5	1.13354	0.477121	5	3	0	8
783	3	CALF	-39.79	-73.39	4	2	2.78	20.1	2	31	110	0	17	158	0.8	38.75	137.5	0	21.25	197.5	1.32428	0.477121	5	3	0	8
784	4	CALF	-39.79	-73.39	4	1	0.31	9.4	0	31	110	0	17	158	0.8	38.75	137.5	0	21.25	197.5	1.01703	0	5	3	0	8
785	4	CALF	-39.79	-73.39	4	1	0.25	9.5	0	31	110	0	17	158	0.8	38.75	137.5	0	21.25	197.5	1.02119	0	5	3	0	8
786	4	CALF	-39.79	-73.39	4	1	0.42	11.2	0	31	110	0	17	158	0.8	38.75	137.5	0	21.25	197.5	1.08636	0	5	3	0	8
787	4	CALF	-39.79	-73.39	4	1	0.49	12.1	0	31	110	0	17	158	0.8	38.75	137.5	0	21.25	197.5	1.11727	0	5	3	0	8
788	1	CHAI	-39.94	-73.58	4	1	0.4	10.9	0	4	47	0	1	52	0.59	6.77966	79.661	0	1.69492	88.1356	1.07555	0	1	2	0	3
789	1	CHAI	-39.94	-73.58	4	1	0.27	11.7	0	4	47	0	1	52	0.59	6.77966	79.661	0	1.69492	88.1356	1.1038	0	1	2	0	3
790	1	CHAI	-39.94	-73.58	4	1	0.33	10.5	0	4	47	0	1	52	0.59	6.77966	79.661	0	1.69492	88.1356	1.0607	0	1	2	0	3
791	1	CHAI	-39.94	-73.58	4	1	0.56	12.2	1	4	47	0	1	52	0.59	6.77966	79.661	0	1.69492	88.1356	1.12057	0.30103	1	2	0	3
792	1	CHAI	-39.94	-73.58	4	1	0.86	14.6	2	4	47	0	1	52	0.59	6.77966	79.661	0	1.69492	88.1356	1.19312	0.477121	1	2	0	3
793	1	CHAI	-39.94	-73.58	4	1	0.56	13	1	4	47	0	1	52	0.59	6.77966	79.661	0	1.69492	88.1356	1.14613	0.30103	1	2	0	3
794	1	CHAI	-39.94	-73.58	4	2	2.16	19.7	1	4	47	0	1	52	0.59	6.77966	79.661	0	1.69492	88.1356	1.31597	0.30103	1	2	0	3
795	1	CHAI	-39.94	-73.58	4	3	3.05	22.1	0	4	47	0	1	52	0.59	6.77966	79.661	0	1.69492	88.1356	1.36361	0	1	2	0	3
796	1	CHAI	-39.94	-73.58	4	3	3.11	22.2	4	4	47	0	1	52	0.59	6.77966	79.661	0	1.69492	88.1356	1.36549	0.69897	1	2	0	3
797	2	CHAI	-39.94	-73.58	4	1	0.48	11.9	3	4	47	0	1	52	0.59	6.77966	79.661	0	1.69492	88.1356	1.11059	0.60206	1	2	0	3
798	2	CHAI	-39.94	-73.58	4	1	0.33	10.4	1	4	47	0	1	52	0.59	6.77966	79.661	0	1.69492	88.1356	1.0569	0.30103	1	2	0	3
799	2	CHAI	-39.94	-73.58	4	1	0.77	14.5	0	4	47	0	1	52	0.59	6.77966	79.661	0	1.69492	88.1356	1.19033	0	1	2	0	3
800	2	CHAI	-39.94	-73.58	4	1	0.53	12.3	1	4	47	0	1	52	0.59	6.77966	79.661	0	1.69492	88.1356	1.12385	0.30103	1	2	0	3
801	2	CHAI	-39.94	-73.58	4	1	0.58	12.7	3	4	47	0	1	52	0.59	6.77966	79.661	0	1.69492	88.1356	1.13672	0.60206	1	2	0	3
802	2	CHAI	-39.94	-73.58	4	3	2.85	21.1	2	4	47	0	1	52	0.59	6.77966	79.661	0	1.69492	88.1356	1.34439	0.477121	1	2	0	3
803	2	CHAI	-39.94	-73.58	4	3	3.31	22.7	4	4	47	0	1	52	0.59	6.77966	79.661	0	1.69492	88.1356	1.37475	0.69897	1	2	0	3
804	2	CHAI	-39.94	-73.58	4	2	2.68	20.9	3	4	47	0	1	52	0.59	6.77966	79.661	0	1.69492	88.1356	1.34044	0.60206	1	2	0	3
805	2	CHAI	-39.94	-73.58	4	3	4.33	24.7	5	4	47	0	1	52	0.59	6.77966	79.661	0	1.69492	88.1356	1.40993	0.778151	1	2	0	3
806	2	CHAI	-39.94	-73.58	4	3	5.39	25.8	1	4	47	0	1	52	0.59	6.77966	79.661	0	1.69492	88.1356	1.42813	0.30103	1	2	0	3
807	3	CHAI	-39.94	-73.58	4	1	0.23	9.4	0	4	47	0	1	52	0.59	6.77966	79.661	0	1.69492	88.1356	1.01703	0	1	2	0	3
808	3	CHAI	-39.94	-73.58	4	1	0.26	10.1	1	4	47	0	1	52	0.59	6.77966	79.661	0	1.69492	88.1356	1.04532	0.30103	1	2	0	3
809	3	CHAI	-39.94	-73.58	4	1	0.48	12	1	4	47	0	1	52	0.59	6.77966	79.661	0	1.69492	88.1356	1.11394	0.30103	1	2	0	3
810	3	CHAI	-39.94	-73.58	4	2	0.75	14	0	4	47	0	1	52	0.59	6.77966	79.661	0	1.69492	88.1356	1.17609	0	1	2	0	3
811	3	CHAI	-39.94	-73.58	4	2	2.91	22.1	1	4	47	0	1	52	0.59	6.77966	79.661	0	1.69492	88.1356	1.36361	0.30103	1	2	0	3
812	3	CHAI	-39.94	-73.58	4	3	2.72	21.5	1	4	47	0	1	52	0.59	6.77966	79.661	0	1.69492	88.1356	1.35218	0.30103	1	2	0	3
813	3	CHAI	-39.94	-73.58	4	3	4.34	25.1	3	4	47	0	1	52	0.59	6.77966	79.661	0	1.69492	88.1356	1.41664	0.60206	1	2	0	3
814	3	CHAI	-39.94	-73.58	4	3	4.4	24.6	3	4	47	0	1	52	0.59	6.77966	79.661	0	1.69492	88.1356	1.40824	0.60206	1	2	0	3
815	3	CHAI	-39.94	-73.58	4	2	4.78	25.2	4	4	47	0	1	52	0.59	6.77966	79.661	0	1.69492	88.1356	1.4183	0.69897	1	2	0	3
816	4	CHAI	-39.94	-73.58	4	1	0.22	9.2	0	4	47	0	1	52	0.59	6.77966	79.661	0	1.69492	88.1356	1.0086	0	1	2	0	3
817	4	CHAI	-39.94	-73.58	4	1	0.31	10.5	0	4	47	0	1	52	0.59	6.77966	79.661	0	1.69492	88.1356	1.0607	0	1	2	0	3
818	4	CHAI	-39.94	-73.58	4	1	0.47	11.9	1	4	47	0	1	52	0.59	6.77966	79.661	0	1.69492	88.1356	1.11059	0.30103	1	2	0	3
819	4	CHAI	-39.94	-73.58	4	1	0.59	13	3	4	47	0	1	52	0.59	6.77966	79.661	0	1.69492	88.1356	1.14613	0.60206	1	2	0	3
820	4	CHAI	-39.94	-73.58	4	1	0.38	11.8	2	4	47	0	1	52	0.59	6.77966	79.661	0	1.69492	88.1356	1.10721	0.477121	1	2	0	3
821	4	CHAI	-39.94	-73.58	4	1	0.52	12.2	0	4	47	0	1	52	0.59	6.77966	79.661	0	1.69492	88.1356	1.12057	0	1	2	0	3
822	4	CHAI	-39.94	-73.58	4	1	0.69	13.4	1	4	47	0	1	52	0.59	6.77966	79.661	0	1.69492	88.1356	1.15836	0.30103	1	2	0	3
823	4	CHAI	-39.94	-73.58	4	1	0.85	15.2	0	4	47	0	1	52	0.59	6.77966	79.661	0	1.69492	88.1356	1.20952	0	1	2	0	3
824	4	CHAI	-39.94	-73.58	4	1	0.49	12.3	1	4	47	0	1	52	0.59	6.77966	79.661	0	1.69492	88.1356	1.12385	0.30103	1	2	0	3
825	4	CHAI	-39.94	-73.58	4	3	3.1	22.3	2	4	47	0	1	52	0.59	6.77966	79.661	0	1.69492	88.1356	1.36736	0.477121	1	2	0	3
826	4	CHAI	-39.94	-73.58	4	3	2.92	22	3	4	47	0	1	52	0.59	6.77966	79.661	0	1.69492	88.1356	1.36173	0.60206	1	2	0	3
827	4	CHAI	-39.94	-73.58	4	3	2.84	21.8	1	4	47	0	1	52	0.59	6.77966	79.661	0	1.69492	88.1356	1.35793	0.30103	1	2	0	3
828	4	CHAI	-39.94	-73.58	4	2	2.78	21.5	2	4	47	0	1	52	0.59	6.77966	79.661	0	1.69492	88.1356	1.35218	0.477121	1	2	0	3
829	4	CHAI	-39.94	-73.58	4	3	3.05	22.8	2	4	47	0	1	52	0.59	6.77966	79.661	0	1.69492	88.1356	1.37658	0.477121	1	2	0	3
830	4	CHAI	-39.94	-73.58	4	3	6.78	28.2	4	4	47	0	1	52	0.59	6.77966	79.661	0	1.69492	88.1356	1.46538	0.69897	1	2	0	3
831	4	CHAI	-39.94	-73.58	4	3	7.1	29.2	7	4	47	0	1	52	0.59	6.77966	79.661	0	1.69492	88.1356	1.48001	0.90309	1	2	0	3
832	1	CHEU	-39.4	-73.22	4	1	0.71	13.4	2	5	25	0	0	30	0.34	14.7059	73.5294	0	0	88.2353	1.15836	0.477121	2	2	0	4
833	1	CHEU	-39.4	-73.22	4	1	0.33	10.2	0	5	25	0	0	30	0.34	14.7059	73.5294	0	0	88.2353	1.04922	0	2	2	0	4
834	1	CHEU	-39.4	-73.22	4	1	0.61	13.2	7	5	25	0	0	30	0.34	14.7059	73.5294	0	0	88.2353	1.15229	0.90309	2	2	0	4
835	1	CHEU	-39.4	-73.22	4	2	1.01	14.7	1	5	25	0	0	30	0.34	14.7059	73.5294	0	0	88.2353	1.1959	0.30103	2	2	0	4
836	1	CHEU	-39.4	-73.22	4	1	0.7	12.8	1	5	25	0	0	30	0.34	14.7059	73.5294	0	0	88.2353	1.13988	0.30103	2	2	0	4
837	1	CHEU	-39.4	-73.22	4	3	2.45	20.8	1	5	25	0	0	30	0.34	14.7059	73.5294	0	0	88.2353	1.33846	0.30103	2	2	0	4
838	1	CHEU	-39.4	-73.22	4	2	2.39	20.4	4	5	25	0	0	30	0.34	14.7059	73.5294	0	0	88.2353	1.33041	0.69897	2	2	0	4
839	1	CHEU	-39.4	-73.22	4	3	2.74	20.9	6	5	25	0	0	30	0.34	14.7059	73.5294	0	0	88.2353	1.34044	0.845098	2	2	0	4
840	1	CHEU	-39.4	-73.22	4	3	3.29	22.5	4	5	25	0	0	30	0.34	14.7059	73.5294	0	0	88.2353	1.37107	0.69897	2	2	0	4
841	2	CHEU	-39.4	-73.22	4	1	0.67	12.7	0	5	25	0	0	30	0.34	14.7059	73.5294	0	0	88.2353	1.13672	0	2	2	0	4
842	2	CHEU	-39.4	-73.22	4	1	0.87	14.2	3	5	25	0	0	30	0.34	14.7059	73.5294	0	0	88.2353	1.18184	0.60206	2	2	0	4
843	2	CHEU	-39.4	-73.22	4	1	0.69	12.9	1	5	25	0	0	30	0.34	14.7059	73.5294	0	0	88.2353	1.14301	0.30103	2	2	0	4
844	2	CHEU	-39.4	-73.22	4	1	0.63	13.1	0	5	25	0	0	30	0.34	14.7059	73.5294	0	0	88.2353	1.14922	0	2	2	0	4
845	2	CHEU	-39.4	-73.22	4	1	0.72	13.2	0	5	25	0	0	30	0.34	14.7059	73.5294	0	0	88.2353	1.15229	0	2	2	0	4
846	2	CHEU	-39.4	-73.22	4	3	2.74	20.6	8	5	25	0	0	30	0.34	14.7059	73.5294	0	0	88.2353	1.33445	0.954243	2	2	0	4
847	2	CHEU	-39.4	-73.22	4	2	3.01	21	1	5	25	0	0	30	0.34	14.7059	73.5294	0	0	88.2353	1.34242	0.30103	2	2	0	4
848	2	CHEU	-39.4	-73.22	4	2	3.01	21.1	7	5	25	0	0	30	0.34	14.7059	73.5294	0	0	88.2353	1.34439	0.90309	2	2	0	4
849	2	CHEU	-39.4	-73.22	4	3	4.35	24.2	4	5	25	0	0	30	0.34	14.7059	73.5294	0	0	88.2353	1.4014	0.69897	2	2	0	4
850	2	CHEU	-39.4	-73.22	4	3	3.52	22.6	2	5	25	0	0	30	0.34	14.7059	73.5294	0	0	88.2353	1.37291	0.477121	2	2	0	4
851	2	CHEU	-39.4	-73.22	4	3	3.21	22.2	8	5	25	0	0	30	0.34	14.7059	73.5294	0	0	88.2353	1.36549	0.954243	2	2	0	4
852	3	CHEU	-39.4	-73.22	4	1	0.36	10.5	3	5	25	0	0	30	0.34	14.7059	73.5294	0	0	88.2353	1.0607	0.60206	2	2	0	4
853	3	CHEU	-39.4	-73.22	4	1	0.45	11.7	0	5	25	0	0	30	0.34	14.7059	73.5294	0	0	88.2353	1.1038	0	2	2	0	4
854	3	CHEU	-39.4	-73.22	4	1	0.73	13.4	3	5	25	0	0	30	0.34	14.7059	73.5294	0	0	88.2353	1.15836	0.60206	2	2	0	4
855	3	CHEU	-39.4	-73.22	4	1	0.56	12	0	5	25	0	0	30	0.34	14.7059	73.5294	0	0	88.2353	1.11394	0	2	2	0	4
856	3	CHEU	-39.4	-73.22	4	1	0.59	12.4	2	5	25	0	0	30	0.34	14.7059	73.5294	0	0	88.2353	1.1271	0.477121	2	2	0	4
857	3	CHEU	-39.4	-73.22	4	1	0.8	12.9	2	5	25	0	0	30	0.34	14.7059	73.5294	0	0	88.2353	1.14301	0.477121	2	2	0	4
858	3	CHEU	-39.4	-73.22	4	1	0.67	13.2	1	5	25	0	0	30	0.34	14.7059	73.5294	0	0	88.2353	1.15229	0.30103	2	2	0	4
859	3	CHEU	-39.4	-73.22	4	1	0.93	13.8	1	5	25	0	0	30	0.34	14.7059	73.5294	0	0	88.2353	1.17026	0.30103	2	2	0	4
860	3	CHEU	-39.4	-73.22	4	1	0.72	12.3	0	5	25	0	0	30	0.34	14.7059	73.5294	0	0	88.2353	1.12385	0	2	2	0	4
861	3	CHEU	-39.4	-73.22	4	3	2.91	21.8	3	5	25	0	0	30	0.34	14.7059	73.5294	0	0	88.2353	1.35793	0.60206	2	2	0	4
862	3	CHEU	-39.4	-73.22	4	3	3.87	23.3	9	5	25	0	0	30	0.34	14.7059	73.5294	0	0	88.2353	1.38561	1	2	2	0	4
863	3	CHEU	-39.4	-73.22	4	3	3.67	22.5	8	5	25	0	0	30	0.34	14.7059	73.5294	0	0	88.2353	1.37107	0.954243	2	2	0	4
864	3	CHEU	-39.4	-73.22	4	3	5.93	26	6	5	25	0	0	30	0.34	14.7059	73.5294	0	0	88.2353	1.43136	0.845098	2	2	0	4
865	4	CHEU	-39.4	-73.22	4	3	2.68	20.6	2	5	25	0	0	30	0.34	14.7059	73.5294	0	0	88.2353	1.33445	0.477121	2	2	0	4
866	4	CHEU	-39.4	-73.22	4	3	3.52	22.1	4	5	25	0	0	30	0.34	14.7059	73.5294	0	0	88.2353	1.36361	0.69897	2	2	0	4
867	4	CHEU	-39.4	-73.22	4	3	3.9	23.4	2	5	25	0	0	30	0.34	14.7059	73.5294	0	0	88.2353	1.38739	0.477121	2	2	0	4
868	4	CHEU	-39.4	-73.22	4	3	2.79	21.3	2	5	25	0	0	30	0.34	14.7059	73.5294	0	0	88.2353	1.3483	0.477121	2	2	0	4
869	1	CURI	-39.73	-73.39	4	1	0.29	9.4	0	8	237	0	0	245	0.92	8.69565	257.609	0	0	266.304	1.01703	0	5	1	0	6
870	1	CURI	-39.73	-73.39	4	1	0.34	10.3	1	8	237	0	0	245	0.92	8.69565	257.609	0	0	266.304	1.05308	0.30103	5	1	0	6
871	1	CURI	-39.73	-73.39	4	1	0.58	12.3	2	8	237	0	0	245	0.92	8.69565	257.609	0	0	266.304	1.12385	0.477121	5	1	0	6
872	1	CURI	-39.73	-73.39	4	1	0.68	12.6	0	8	237	0	0	245	0.92	8.69565	257.609	0	0	266.304	1.13354	0	5	1	0	6
873	1	CURI	-39.73	-73.39	4	1	0.69	13	0	8	237	0	0	245	0.92	8.69565	257.609	0	0	266.304	1.14613	0	5	1	0	6
874	1	CURI	-39.73	-73.39	4	1	0.77	13.3	1	8	237	0	0	245	0.92	8.69565	257.609	0	0	266.304	1.15534	0.30103	5	1	0	6
875	1	CURI	-39.73	-73.39	4	1	0.76	13.6	1	8	237	0	0	245	0.92	8.69565	257.609	0	0	266.304	1.16435	0.30103	5	1	0	6
876	1	CURI	-39.73	-73.39	4	1	0.69	12.7	3	8	237	0	0	245	0.92	8.69565	257.609	0	0	266.304	1.13672	0.60206	5	1	0	6
877	1	CURI	-39.73	-73.39	4	1	0.79	13.4	5	8	237	0	0	245	0.92	8.69565	257.609	0	0	266.304	1.15836	0.778151	5	1	0	6
878	1	CURI	-39.73	-73.39	4	1	0.99	14.1	2	8	237	0	0	245	0.92	8.69565	257.609	0	0	266.304	1.17898	0.477121	5	1	0	6
879	1	CURI	-39.73	-73.39	4	1	0.81	13.8	4	8	237	0	0	245	0.92	8.69565	257.609	0	0	266.304	1.17026	0.69897	5	1	0	6
880	1	CURI	-39.73	-73.39	4	1	0.72	13	0	8	237	0	0	245	0.92	8.69565	257.609	0	0	266.304	1.14613	0	5	1	0	6
881	1	CURI	-39.73	-73.39	4	1	0.94	13.3	1	8	237	0	0	245	0.92	8.69565	257.609	0	0	266.304	1.15534	0.30103	5	1	0	6
882	1	CURI	-39.73	-73.39	4	2	2.56	21.2	2	8	237	0	0	245	0.92	8.69565	257.609	0	0	266.304	1.34635	0.477121	5	1	0	6
883	1	CURI	-39.73	-73.39	4	2	1.79	18.4	1	8	237	0	0	245	0.92	8.69565	257.609	0	0	266.304	1.2878	0.30103	5	1	0	6
884	2	CURI	-39.73	-73.39	4	1	0.49	11.6	3	8	237	0	0	245	0.92	8.69565	257.609	0	0	266.304	1.10037	0.60206	5	1	0	6
885	2	CURI	-39.73	-73.39	4	1	0.54	12.1	0	8	237	0	0	245	0.92	8.69565	257.609	0	0	266.304	1.11727	0	5	1	0	6
886	2	CURI	-39.73	-73.39	4	1	0.43	11.7	1	8	237	0	0	245	0.92	8.69565	257.609	0	0	266.304	1.1038	0.30103	5	1	0	6
887	2	CURI	-39.73	-73.39	4	2	1.25	16.1	0	8	237	0	0	245	0.92	8.69565	257.609	0	0	266.304	1.233	0	5	1	0	6
888	2	CURI	-39.73	-73.39	4	2	2.25	19.6	0	8	237	0	0	245	0.92	8.69565	257.609	0	0	266.304	1.31387	0	5	1	0	6
889	2	CURI	-39.73	-73.39	4	3	3.27	22.7	5	8	237	0	0	245	0.92	8.69565	257.609	0	0	266.304	1.37475	0.778151	5	1	0	6
890	2	CURI	-39.73	-73.39	4	3	6.55	28.2	14	8	237	0	0	245	0.92	8.69565	257.609	0	0	266.304	1.46538	1.17609	5	1	0	6
891	3	CURI	-39.73	-73.39	4	1	0.61	11.9	3	8	237	0	0	245	0.92	8.69565	257.609	0	0	266.304	1.11059	0.60206	5	1	0	6
892	3	CURI	-39.73	-73.39	4	1	0.27	9	0	8	237	0	0	245	0.92	8.69565	257.609	0	0	266.304	1	0	5	1	0	6
893	3	CURI	-39.73	-73.39	4	3	5.42	26.2	4	8	237	0	0	245	0.92	8.69565	257.609	0	0	266.304	1.43457	0.69897	5	1	0	6
894	4	CURI	-39.73	-73.39	4	3	6.14	27.1	3	8	237	0	0	245	0.92	8.69565	257.609	0	0	266.304	1.44871	0.60206	5	1	0	6
895	1	CALF	-39.79	-73.39	5	3	4.45	23	1	107	270	0	348	725	0.8	133.75	337.5	0	435	906.25	1.38021	0.30103	20	0	0	20
896	1	CALF	-39.79	-73.39	5	2	4.38	23.9	3	107	270	0	348	725	0.8	133.75	337.5	0	435	906.25	1.3962	0.60206	20	0	0	20
897	1	CALF	-39.79	-73.39	5	2	5.41	26.2	6	107	270	0	348	725	0.8	133.75	337.5	0	435	906.25	1.43457	0.845098	20	0	0	20
898	1	CALF	-39.79	-73.39	5	3	6.69	28.5	8	107	270	0	348	725	0.8	133.75	337.5	0	435	906.25	1.46982	0.954243	20	0	0	20
899	1	CALF	-39.79	-73.39	5	2	3.06	22.6	5	107	270	0	348	725	0.8	133.75	337.5	0	435	906.25	1.37291	0.778151	20	0	0	20
900	1	CALF	-39.79	-73.39	5	3	4.99	24.7	3	107	270	0	348	725	0.8	133.75	337.5	0	435	906.25	1.40993	0.60206	20	0	0	20
901	1	CALF	-39.79	-73.39	5	3	3.65	22.3	0	107	270	0	348	725	0.8	133.75	337.5	0	435	906.25	1.36736	0	20	0	0	20
902	1	CALF	-39.79	-73.39	5	2	4.52	24.4	0	107	270	0	348	725	0.8	133.75	337.5	0	435	906.25	1.40483	0	20	0	0	20
903	1	CALF	-39.79	-73.39	5	3	4.25	23	2	107	270	0	348	725	0.8	133.75	337.5	0	435	906.25	1.38021	0.477121	20	0	0	20
904	1	CALF	-39.79	-73.39	5	3	5.59	25.5	0	107	270	0	348	725	0.8	133.75	337.5	0	435	906.25	1.42325	0	20	0	0	20
905	1	CALF	-39.79	-73.39	5	3	4.21	23.3	2	107	270	0	348	725	0.8	133.75	337.5	0	435	906.25	1.38561	0.477121	20	0	0	20
906	1	CALF	-39.79	-73.39	5	3	6.57	27.8	4	107	270	0	348	725	0.8	133.75	337.5	0	435	906.25	1.45939	0.69897	20	0	0	20
907	1	CALF	-39.79	-73.39	5	3	4.12	24.4	1	107	270	0	348	725	0.8	133.75	337.5	0	435	906.25	1.40483	0.30103	20	0	0	20
908	1	CALF	-39.79	-73.39	5	2	3.31	24.5	4	107	270	0	348	725	0.8	133.75	337.5	0	435	906.25	1.40654	0.69897	20	0	0	20
909	1	CALF	-39.79	-73.39	5	2	3.48	22.4	2	107	270	0	348	725	0.8	133.75	337.5	0	435	906.25	1.36922	0.477121	20	0	0	20
910	1	CALF	-39.79	-73.39	5	1	0.98	15	3	107	270	0	348	725	0.8	133.75	337.5	0	435	906.25	1.20412	0.60206	20	0	0	20
911	1	CALF	-39.79	-73.39	5	3	1.55	17.2	2	107	270	0	348	725	0.8	133.75	337.5	0	435	906.25	1.26007	0.477121	20	0	0	20
912	1	CALF	-39.79	-73.39	5	1	0.63	13.8	1	107	270	0	348	725	0.8	133.75	337.5	0	435	906.25	1.17026	0.30103	20	0	0	20
913	1	CALF	-39.79	-73.39	5	1	0.71	13.8	1	107	270	0	348	725	0.8	133.75	337.5	0	435	906.25	1.17026	0.30103	20	0	0	20
914	1	CALF	-39.79	-73.39	5	1	0.9	14.5	0	107	270	0	348	725	0.8	133.75	337.5	0	435	906.25	1.19033	0	20	0	0	20
915	1	CALF	-39.79	-73.39	5	1	0.84	13.1	0	107	270	0	348	725	0.8	133.75	337.5	0	435	906.25	1.14922	0	20	0	0	20
916	1	CALF	-39.79	-73.39	5	1	0.74	14.1	0	107	270	0	348	725	0.8	133.75	337.5	0	435	906.25	1.17898	0	20	0	0	20
917	1	CALF	-39.79	-73.39	5	1	0.68	13	2	107	270	0	348	725	0.8	133.75	337.5	0	435	906.25	1.14613	0.477121	20	0	0	20
918	1	CALF	-39.79	-73.39	5	1	0.68	13.6	3	107	270	0	348	725	0.8	133.75	337.5	0	435	906.25	1.16435	0.60206	20	0	0	20
919	1	CALF	-39.79	-73.39	5	1	0.92	14.5	0	107	270	0	348	725	0.8	133.75	337.5	0	435	906.25	1.19033	0	20	0	0	20
920	1	CALF	-39.79	-73.39	5	1	0.5	12.5	2	107	270	0	348	725	0.8	133.75	337.5	0	435	906.25	1.13033	0.477121	20	0	0	20
921	1	CALF	-39.79	-73.39	5	1	0.51	11.9	2	107	270	0	348	725	0.8	133.75	337.5	0	435	906.25	1.11059	0.477121	20	0	0	20
922	1	CALF	-39.79	-73.39	5	1	0.26	10	0	107	270	0	348	725	0.8	133.75	337.5	0	435	906.25	1.04139	0	20	0	0	20
923	2	CALF	-39.79	-73.39	5	2	5.76	27.2	1	107	270	0	348	725	0.8	133.75	337.5	0	435	906.25	1.45025	0.30103	20	0	0	20
924	2	CALF	-39.79	-73.39	5	3	4.59	25.5	1	107	270	0	348	725	0.8	133.75	337.5	0	435	906.25	1.42325	0.30103	20	0	0	20
925	2	CALF	-39.79	-73.39	5	3	0.14	30.7	9	107	270	0	348	725	0.8	133.75	337.5	0	435	906.25	1.50106	1	20	0	0	20
926	2	CALF	-39.79	-73.39	5	3	6.53	27.8	3	107	270	0	348	725	0.8	133.75	337.5	0	435	906.25	1.45939	0.60206	20	0	0	20
927	2	CALF	-39.79	-73.39	5	3	4.88	25.7	2	107	270	0	348	725	0.8	133.75	337.5	0	435	906.25	1.42651	0.477121	20	0	0	20
928	2	CALF	-39.79	-73.39	5	1	3.43	23	0	107	270	0	348	725	0.8	133.75	337.5	0	435	906.25	1.38021	0	20	0	0	20
929	2	CALF	-39.79	-73.39	5	3	3.04	22.2	2	107	270	0	348	725	0.8	133.75	337.5	0	435	906.25	1.36549	0.477121	20	0	0	20
930	2	CALF	-39.79	-73.39	5	3	4.13	27.3	3	107	270	0	348	725	0.8	133.75	337.5	0	435	906.25	1.45179	0.60206	20	0	0	20
931	2	CALF	-39.79	-73.39	5	3	3.64	23.9	1	107	270	0	348	725	0.8	133.75	337.5	0	435	906.25	1.3962	0.30103	20	0	0	20
932	2	CALF	-39.79	-73.39	5	3	2.97	23.7	0	107	270	0	348	725	0.8	133.75	337.5	0	435	906.25	1.3927	0	20	0	0	20
933	2	CALF	-39.79	-73.39	5	3	3.45	22.3	2	107	270	0	348	725	0.8	133.75	337.5	0	435	906.25	1.36736	0.477121	20	0	0	20
934	2	CALF	-39.79	-73.39	5	3	3.01	23	4	107	270	0	348	725	0.8	133.75	337.5	0	435	906.25	1.38021	0.69897	20	0	0	20
935	2	CALF	-39.79	-73.39	5	2	1.12	17.7	0	107	270	0	348	725	0.8	133.75	337.5	0	435	906.25	1.27184	0	20	0	0	20
936	2	CALF	-39.79	-73.39	5	2	1.68	18.7	2	107	270	0	348	725	0.8	133.75	337.5	0	435	906.25	1.29447	0.477121	20	0	0	20
937	2	CALF	-39.79	-73.39	5	1	0.54	13.6	7	107	270	0	348	725	0.8	133.75	337.5	0	435	906.25	1.16435	0.90309	20	0	0	20
938	2	CALF	-39.79	-73.39	5	1	0.52	12.5	5	107	270	0	348	725	0.8	133.75	337.5	0	435	906.25	1.13033	0.778151	20	0	0	20
939	2	CALF	-39.79	-73.39	5	1	0.76	14.6	2	107	270	0	348	725	0.8	133.75	337.5	0	435	906.25	1.19312	0.477121	20	0	0	20
940	2	CALF	-39.79	-73.39	5	1	0.63	13.7	1	107	270	0	348	725	0.8	133.75	337.5	0	435	906.25	1.16732	0.30103	20	0	0	20
941	2	CALF	-39.79	-73.39	5	1	0.63	13.8	0	107	270	0	348	725	0.8	133.75	337.5	0	435	906.25	1.17026	0	20	0	0	20
942	2	CALF	-39.79	-73.39	5	1	0.6	14.8	1	107	270	0	348	725	0.8	133.75	337.5	0	435	906.25	1.19866	0.30103	20	0	0	20
943	2	CALF	-39.79	-73.39	5	1	0.6	13.5	1	107	270	0	348	725	0.8	133.75	337.5	0	435	906.25	1.16137	0.30103	20	0	0	20
944	2	CALF	-39.79	-73.39	5	1	0.34	13.3	1	107	270	0	348	725	0.8	133.75	337.5	0	435	906.25	1.15534	0.30103	20	0	0	20
945	2	CALF	-39.79	-73.39	5	1	0.43	13.1	3	107	270	0	348	725	0.8	133.75	337.5	0	435	906.25	1.14922	0.60206	20	0	0	20
946	2	CALF	-39.79	-73.39	5	1	0.17	10	0	107	270	0	348	725	0.8	133.75	337.5	0	435	906.25	1.04139	0	20	0	0	20
947	2	CALF	-39.79	-73.39	5	2	0.14	8.8	0	107	270	0	348	725	0.8	133.75	337.5	0	435	906.25	0.991226	0	20	0	0	20
948	2	CALF	-39.79	-73.39	5	2	0.14	10	0	107	270	0	348	725	0.8	133.75	337.5	0	435	906.25	1.04139	0	20	0	0	20
949	2	CALF	-39.79	-73.39	5	1	0.13	8.8	0	107	270	0	348	725	0.8	133.75	337.5	0	435	906.25	0.991226	0	20	0	0	20
950	4	CALF	-39.79	-73.39	5	3	8.22	29.8	5	107	270	0	348	725	0.8	133.75	337.5	0	435	906.25	1.48855	0.778151	20	0	0	20
951	4	CALF	-39.79	-73.39	5	3	8.27	29.2	15	107	270	0	348	725	0.8	133.75	337.5	0	435	906.25	1.48001	1.20412	20	0	0	20
952	4	CALF	-39.79	-73.39	5	3	4.88	25.4	1	107	270	0	348	725	0.8	133.75	337.5	0	435	906.25	1.4216	0.30103	20	0	0	20
953	4	CALF	-39.79	-73.39	5	3	5.2	24.6	5	107	270	0	348	725	0.8	133.75	337.5	0	435	906.25	1.40824	0.778151	20	0	0	20
954	4	CALF	-39.79	-73.39	5	3	2.99	24.3	4	107	270	0	348	725	0.8	133.75	337.5	0	435	906.25	1.40312	0.69897	20	0	0	20
955	4	CALF	-39.79	-73.39	5	1	0.47	12.2	1	107	270	0	348	725	0.8	133.75	337.5	0	435	906.25	1.12057	0.30103	20	0	0	20
956	1	CHAI	-39.94	-73.58	5	1	0.1	7.1	0	2	0	0	6	8	0.59	3.38983	0	0	10.1695	13.5593	0.908485	0	12	0	0	12
957	1	CHAI	-39.94	-73.58	5	1	0.16	9.2	0	2	0	0	6	8	0.59	3.38983	0	0	10.1695	13.5593	1.0086	0	12	0	0	12
958	1	CHAI	-39.94	-73.58	5	1	0.19	8.7	0	2	0	0	6	8	0.59	3.38983	0	0	10.1695	13.5593	0.986772	0	12	0	0	12
959	1	CHAI	-39.94	-73.58	5	1	0.1	7.5	0	2	0	0	6	8	0.59	3.38983	0	0	10.1695	13.5593	0.929419	0	12	0	0	12
960	1	CHAI	-39.94	-73.58	5	1	0.11	8	0	2	0	0	6	8	0.59	3.38983	0	0	10.1695	13.5593	0.954243	0	12	0	0	12
961	1	CHAI	-39.94	-73.58	5	1	0.17	9	0	2	0	0	6	8	0.59	3.38983	0	0	10.1695	13.5593	1	0	12	0	0	12
962	1	CHAI	-39.94	-73.58	5	1	0.11	7.6	0	2	0	0	6	8	0.59	3.38983	0	0	10.1695	13.5593	0.934498	0	12	0	0	12
963	1	CHAI	-39.94	-73.58	5	1	0.17	9.7	0	2	0	0	6	8	0.59	3.38983	0	0	10.1695	13.5593	1.02938	0	12	0	0	12
964	1	CHAI	-39.94	-73.58	5	1	0.17	9.9	0	2	0	0	6	8	0.59	3.38983	0	0	10.1695	13.5593	1.03743	0	12	0	0	12
965	1	CHAI	-39.94	-73.58	5	1	0.2	10	0	2	0	0	6	8	0.59	3.38983	0	0	10.1695	13.5593	1.04139	0	12	0	0	12
966	2	CHAI	-39.94	-73.58	5	1	0.12	9.2	0	2	0	0	6	8	0.59	3.38983	0	0	10.1695	13.5593	1.0086	0	12	0	0	12
967	2	CHAI	-39.94	-73.58	5	1	0.17	9.7	0	2	0	0	6	8	0.59	3.38983	0	0	10.1695	13.5593	1.02938	0	12	0	0	12
968	2	CHAI	-39.94	-73.58	5	1	0.14	9.1	0	2	0	0	6	8	0.59	3.38983	0	0	10.1695	13.5593	1.00432	0	12	0	0	12
969	2	CHAI	-39.94	-73.58	5	1	0.13	8.7	0	2	0	0	6	8	0.59	3.38983	0	0	10.1695	13.5593	0.986772	0	12	0	0	12
970	3	CHAI	-39.94	-73.58	5	1	0.07	7	0	2	0	0	6	8	0.59	3.38983	0	0	10.1695	13.5593	0.90309	0	12	0	0	12
971	3	CHAI	-39.94	-73.58	5	1	0.13	8.3	0	2	0	0	6	8	0.59	3.38983	0	0	10.1695	13.5593	0.968483	0	12	0	0	12
972	3	CHAI	-39.94	-73.58	5	1	0.18	9	0	2	0	0	6	8	0.59	3.38983	0	0	10.1695	13.5593	1	0	12	0	0	12
973	3	CHAI	-39.94	-73.58	5	1	0.19	9.6	0	2	0	0	6	8	0.59	3.38983	0	0	10.1695	13.5593	1.02531	0	12	0	0	12
974	4	CHAI	-39.94	-73.58	5	1	0.15	8	0	2	0	0	6	8	0.59	3.38983	0	0	10.1695	13.5593	0.954243	0	12	0	0	12
975	4	CHAI	-39.94	-73.58	5	1	0.19	8.2	0	2	0	0	6	8	0.59	3.38983	0	0	10.1695	13.5593	0.963788	0	12	0	0	12
976	4	CHAI	-39.94	-73.58	5	1	0.13	8.5	0	2	0	0	6	8	0.59	3.38983	0	0	10.1695	13.5593	0.977724	0	12	0	0	12
977	4	CHAI	-39.94	-73.58	5	1	0.1	7.7	0	2	0	0	6	8	0.59	3.38983	0	0	10.1695	13.5593	0.939519	0	12	0	0	12
978	4	CHAI	-39.94	-73.58	5	1	0.11	8	0	2	0	0	6	8	0.59	3.38983	0	0	10.1695	13.5593	0.954243	0	12	0	0	12
979	4	CHAI	-39.94	-73.58	5	1	0.11	8.2	0	2	0	0	6	8	0.59	3.38983	0	0	10.1695	13.5593	0.963788	0	12	0	0	12
980	4	CHAI	-39.94	-73.58	5	2	0.14	8.8	0	2	0	0	6	8	0.59	3.38983	0	0	10.1695	13.5593	0.991226	0	12	0	0	12
981	4	CHAI	-39.94	-73.58	5	3	4.84	27	7	2	0	0	6	8	0.59	3.38983	0	0	10.1695	13.5593	1.44716	0.90309	12	0	0	12
982	4	CHAI	-39.94	-73.58	5	1	6.39	28.5	0	2	0	0	6	8	0.59	3.38983	0	0	10.1695	13.5593	1.46982	0	12	0	0	12
983	2	CHEU	-39.4	-73.22	5	1	0.3	10.4	0	5	0	0	42	47	0.34	14.7059	0	0	123.529	138.235	1.0569	0	6	0	0	6
984	2	CHEU	-39.4	-73.22	5	1	0.55	11.7	1	5	0	0	42	47	0.34	14.7059	0	0	123.529	138.235	1.1038	0.30103	6	0	0	6
985	2	CHEU	-39.4	-73.22	5	1	0.63	13.6	3	5	0	0	42	47	0.34	14.7059	0	0	123.529	138.235	1.16435	0.60206	6	0	0	6
986	2	CHEU	-39.4	-73.22	5	1	1.07	15.4	3	5	0	0	42	47	0.34	14.7059	0	0	123.529	138.235	1.21484	0.60206	6	0	0	6
987	2	CHEU	-39.4	-73.22	5	1	0.81	14.7	2	5	0	0	42	47	0.34	14.7059	0	0	123.529	138.235	1.1959	0.477121	6	0	0	6
988	2	CHEU	-39.4	-73.22	5	1	0.74	14.2	5	5	0	0	42	47	0.34	14.7059	0	0	123.529	138.235	1.18184	0.778151	6	0	0	6
989	2	CHEU	-39.4	-73.22	5	3	3.67	22.1	11	5	0	0	42	47	0.34	14.7059	0	0	123.529	138.235	1.36361	1.07918	6	0	0	6
990	2	CHEU	-39.4	-73.22	5	3	4.42	23.91	5	5	0	0	42	47	0.34	14.7059	0	0	123.529	138.235	1.39637	0.778151	6	0	0	6
991	2	CHEU	-39.4	-73.22	5	3	4.82	24.9	3	5	0	0	42	47	0.34	14.7059	0	0	123.529	138.235	1.4133	0.60206	6	0	0	6
992	3	CHEU	-39.4	-73.22	5	3	4.68	24.32	4	5	0	0	42	47	0.34	14.7059	0	0	123.529	138.235	1.40346	0.69897	6	0	0	6
993	3	CHEU	-39.4	-73.22	5	1	0.21	9.3	0	5	0	0	42	47	0.34	14.7059	0	0	123.529	138.235	1.01284	0	6	0	0	6
994	3	CHEU	-39.4	-73.22	5	1	0.88	14.7	3	5	0	0	42	47	0.34	14.7059	0	0	123.529	138.235	1.1959	0.60206	6	0	0	6
995	4	CHEU	-39.4	-73.22	5	3	3.9	24.9	7	5	0	0	42	47	0.34	14.7059	0	0	123.529	138.235	1.4133	0.90309	6	0	0	6
996	4	CHEU	-39.4	-73.22	5	1	0.78	14.33	1	5	0	0	42	47	0.34	14.7059	0	0	123.529	138.235	1.18554	0.30103	6	0	0	6
997	4	CHEU	-39.4	-73.22	5	1	0.32	11	0	5	0	0	42	47	0.34	14.7059	0	0	123.529	138.235	1.07918	0	6	0	0	6
998	4	CHEU	-39.4	-73.22	5	1	0.64	13.4	1	5	0	0	42	47	0.34	14.7059	0	0	123.529	138.235	1.15836	0.30103	6	0	0	6
999	4	CHEU	-39.4	-73.22	5	1	0.81	14.66	2	5	0	0	42	47	0.34	14.7059	0	0	123.529	138.235	1.19479	0.477121	6	0	0	6
1000	4	CHEU	-39.4	-73.22	5	3	1.63	18.6	7	5	0	0	42	47	0.34	14.7059	0	0	123.529	138.235	1.29226	0.90309	6	0	0	6
1001	4	CHEU	-39.4	-73.22	5	3	3.97	23.1	8	5	0	0	42	47	0.34	14.7059	0	0	123.529	138.235	1.38202	0.954243	6	0	0	6
1002	1	CURI	-39.73	-73.39	5	1	0.11	8.8	0	5	29	0	89	123	0.92	5.43478	31.5217	0	96.7391	133.696	0.991226	0	45	0	0	45
1003	1	CURI	-39.73	-73.39	5	1	0.18	9.1	0	5	29	0	89	123	0.92	5.43478	31.5217	0	96.7391	133.696	1.00432	0	45	0	0	45
1004	1	CURI	-39.73	-73.39	5	1	0.19	9.2	0	5	29	0	89	123	0.92	5.43478	31.5217	0	96.7391	133.696	1.0086	0	45	0	0	45
1005	1	CURI	-39.73	-73.39	5	1	0.21	8.4	0	5	29	0	89	123	0.92	5.43478	31.5217	0	96.7391	133.696	0.973128	0	45	0	0	45
1006	1	CURI	-39.73	-73.39	5	1	0.18	8.7	0	5	29	0	89	123	0.92	5.43478	31.5217	0	96.7391	133.696	0.986772	0	45	0	0	45
1007	1	CURI	-39.73	-73.39	5	2	0.39	11.2	0	5	29	0	89	123	0.92	5.43478	31.5217	0	96.7391	133.696	1.08636	0	45	0	0	45
1008	1	CURI	-39.73	-73.39	5	1	0.5	12.2	0	5	29	0	89	123	0.92	5.43478	31.5217	0	96.7391	133.696	1.12057	0	45	0	0	45
1009	1	CURI	-39.73	-73.39	5	1	0.77	14.2	2	5	29	0	89	123	0.92	5.43478	31.5217	0	96.7391	133.696	1.18184	0.477121	45	0	0	45
1010	1	CURI	-39.73	-73.39	5	3	1.89	18.9	0	5	29	0	89	123	0.92	5.43478	31.5217	0	96.7391	133.696	1.29885	0	45	0	0	45
1011	1	CURI	-39.73	-73.39	5	3	4.33	24.2	3	5	29	0	89	123	0.92	5.43478	31.5217	0	96.7391	133.696	1.4014	0.60206	45	0	0	45
1012	1	CURI	-39.73	-73.39	5	3	3.38	22.4	2	5	29	0	89	123	0.92	5.43478	31.5217	0	96.7391	133.696	1.36922	0.477121	45	0	0	45
1013	1	CURI	-39.73	-73.39	5	3	4.03	22.4	3	5	29	0	89	123	0.92	5.43478	31.5217	0	96.7391	133.696	1.36922	0.60206	45	0	0	45
1014	3	CURI	-39.73	-73.39	5	3	5.15	25.3	3	5	29	0	89	123	0.92	5.43478	31.5217	0	96.7391	133.696	1.41996	0.60206	45	0	0	45
1015	3	CURI	-39.73	-73.39	5	1	0.8	14.5	1	5	29	0	89	123	0.92	5.43478	31.5217	0	96.7391	133.696	1.19033	0.30103	45	0	0	45
1016	3	CURI	-39.73	-73.39	5	1	0.57	12.4	1	5	29	0	89	123	0.92	5.43478	31.5217	0	96.7391	133.696	1.1271	0.30103	45	0	0	45
1017	3	CURI	-39.73	-73.39	5	1	0.81	13.4	1	5	29	0	89	123	0.92	5.43478	31.5217	0	96.7391	133.696	1.15836	0.30103	45	0	0	45
1018	3	CURI	-39.73	-73.39	5	1	0.44	12.6	0	5	29	0	89	123	0.92	5.43478	31.5217	0	96.7391	133.696	1.13354	0	45	0	0	45
1019	3	CURI	-39.73	-73.39	5	1	0.6	13.6	2	5	29	0	89	123	0.92	5.43478	31.5217	0	96.7391	133.696	1.16435	0.477121	45	0	0	45
1020	3	CURI	-39.73	-73.39	5	1	0.38	13.3	1	5	29	0	89	123	0.92	5.43478	31.5217	0	96.7391	133.696	1.15534	0.30103	45	0	0	45
1021	3	CURI	-39.73	-73.39	5	1	0.13	8.2	0	5	29	0	89	123	0.92	5.43478	31.5217	0	96.7391	133.696	0.963788	0	45	0	0	45
1022	3	CURI	-39.73	-73.39	5	1	0.14	8.1	0	5	29	0	89	123	0.92	5.43478	31.5217	0	96.7391	133.696	0.959041	0	45	0	0	45
1023	3	CURI	-39.73	-73.39	5	1	0.15	8.7	0	5	29	0	89	123	0.92	5.43478	31.5217	0	96.7391	133.696	0.986772	0	45	0	0	45
1024	3	CURI	-39.73	-73.39	5	1	0.88	14.9	1	5	29	0	89	123	0.92	5.43478	31.5217	0	96.7391	133.696	1.2014	0.30103	45	0	0	45
1025	3	CURI	-39.73	-73.39	5	2	2.05	19.7	2	5	29	0	89	123	0.92	5.43478	31.5217	0	96.7391	133.696	1.31597	0.477121	45	0	0	45
1026	3	CURI	-39.73	-73.39	5	3	3.11	22	0	5	29	0	89	123	0.92	5.43478	31.5217	0	96.7391	133.696	1.36173	0	45	0	0	45
1027	3	CURI	-39.73	-73.39	5	3	3.19	21.7	1	5	29	0	89	123	0.92	5.43478	31.5217	0	96.7391	133.696	1.35603	0.30103	45	0	0	45
1028	4	CURI	-39.73	-73.39	5	2	3.65	23.2	0	5	29	0	89	123	0.92	5.43478	31.5217	0	96.7391	133.696	1.38382	0	45	0	0	45
1029	4	CURI	-39.73	-73.39	5	2	3.1	23.5	0	5	29	0	89	123	0.92	5.43478	31.5217	0	96.7391	133.696	1.38917	0	45	0	0	45
1030	4	CURI	-39.73	-73.39	5	3	6.7	26.7	4	5	29	0	89	123	0.92	5.43478	31.5217	0	96.7391	133.696	1.44248	0.69897	45	0	0	45
1031	4	CURI	-39.73	-73.39	5	3	5.76	24.6	3	5	29	0	89	123	0.92	5.43478	31.5217	0	96.7391	133.696	1.40824	0.60206	45	0	0	45
1032	4	CURI	-39.73	-73.39	5	2	2.42	18.7	4	5	29	0	89	123	0.92	5.43478	31.5217	0	96.7391	133.696	1.29447	0.69897	45	0	0	45
1033	4	CURI	-39.73	-73.39	5	2	1.39	16.9	1	5	29	0	89	123	0.92	5.43478	31.5217	0	96.7391	133.696	1.25285	0.30103	45	0	0	45
1034	4	CURI	-39.73	-73.39	5	3	4.32	23.2	1	5	29	0	89	123	0.92	5.43478	31.5217	0	96.7391	133.696	1.38382	0.30103	45	0	0	45
1035	4	CURI	-39.73	-73.39	5	3	5.48	24.9	4	5	29	0	89	123	0.92	5.43478	31.5217	0	96.7391	133.696	1.4133	0.69897	45	0	0	45
1036	4	CURI	-39.73	-73.39	5	2	3.87	23.5	5	5	29	0	89	123	0.92	5.43478	31.5217	0	96.7391	133.696	1.38917	0.778151	45	0	0	45
1037	4	CURI	-39.73	-73.39	5	3	3.65	23.6	1	5	29	0	89	123	0.92	5.43478	31.5217	0	96.7391	133.696	1.39094	0.30103	45	0	0	45
1038	4	CURI	-39.73	-73.39	5	3	4.55	23.8	3	5	29	0	89	123	0.92	5.43478	31.5217	0	96.7391	133.696	1.39445	0.60206	45	0	0	45
1039	4	CURI	-39.73	-73.39	5	3	5.21	25.7	2	5	29	0	89	123	0.92	5.43478	31.5217	0	96.7391	133.696	1.42651	0.477121	45	0	0	45
1040	4	CURI	-39.73	-73.39	5	2	3.58	23.1	5	5	29	0	89	123	0.92	5.43478	31.5217	0	96.7391	133.696	1.38202	0.778151	45	0	0	45
1041	4	CURI	-39.73	-73.39	5	3	4	23.8	0	5	29	0	89	123	0.92	5.43478	31.5217	0	96.7391	133.696	1.39445	0	45	0	0	45
1042	4	CURI	-39.73	-73.39	5	3	4.21	24.4	2	5	29	0	89	123	0.92	5.43478	31.5217	0	96.7391	133.696	1.40483	0.477121	45	0	0	45
1043	4	CURI	-39.73	-73.39	5	2	0.91	16.9	2	5	29	0	89	123	0.92	5.43478	31.5217	0	96.7391	133.696	1.25285	0.477121	45	0	0	45
1044	4	CURI	-39.73	-73.39	5	2	1.04	15	2	5	29	0	89	123	0.92	5.43478	31.5217	0	96.7391	133.696	1.20412	0.477121	45	0	0	45
1045	4	CURI	-39.73	-73.39	5	1	0.87	13.3	2	5	29	0	89	123	0.92	5.43478	31.5217	0	96.7391	133.696	1.15534	0.477121	45	0	0	45
1046	4	CURI	-39.73	-73.39	5	1	0.75	13.4	1	5	29	0	89	123	0.92	5.43478	31.5217	0	96.7391	133.696	1.15836	0.30103	45	0	0	45
1047	4	CURI	-39.73	-73.39	5	1	0.38	11.1	1	5	29	0	89	123	0.92	5.43478	31.5217	0	96.7391	133.696	1.08279	0.30103	45	0	0	45
1048	4	CURI	-39.73	-73.39	5	1	0.26	10.8	0	5	29	0	89	123	0.92	5.43478	31.5217	0	96.7391	133.696	1.07188	0	45	0	0	45
1049	4	CURI	-39.73	-73.39	5	1	0.19	9.5	0	5	29	0	89	123	0.92	5.43478	31.5217	0	96.7391	133.696	1.02119	0	45	0	0	45
1050	4	CURI	-39.73	-73.39	5	1	0.28	9.8	0	5	29	0	89	123	0.92	5.43478	31.5217	0	96.7391	133.696	1.03342	0	45	0	0	45
1051	4	CURI	-39.73	-73.39	5	1	0.15	8.4	0	5	29	0	89	123	0.92	5.43478	31.5217	0	96.7391	133.696	0.973128	0	45	0	0	45
1052	4	CURI	-39.73	-73.39	5	1	0.17	8.5	0	5	29	0	89	123	0.92	5.43478	31.5217	0	96.7391	133.696	0.977724	0	45	0	0	45
1053	4	CURI	-39.73	-73.39	5	1	0.16	8.3	0	5	29	0	89	123	0.92	5.43478	31.5217	0	96.7391	133.696	0.968483	0	45	0	0	45
1054	4	CURI	-39.73	-73.39	5	1	0.12	8.4	0	5	29	0	89	123	0.92	5.43478	31.5217	0	96.7391	133.696	0.973128	0	45	0	0	45
1055	4	CURI	-39.73	-73.39	5	1	0.23	9.5	0	5	29	0	89	123	0.92	5.43478	31.5217	0	96.7391	133.696	1.02119	0	45	0	0	45
1056	4	CURI	-39.73	-73.39	5	1	0.39	12	2	5	29	0	89	123	0.92	5.43478	31.5217	0	96.7391	133.696	1.11394	0.477121	45	0	0	45
1057	4	CURI	-39.73	-73.39	5	1	0.17	8.7	0	5	29	0	89	123	0.92	5.43478	31.5217	0	96.7391	133.696	0.986772	0	45	0	0	45
1058	4	CURI	-39.73	-73.39	5	1	0.38	12.7	1	5	29	0	89	123	0.92	5.43478	31.5217	0	96.7391	133.696	1.13672	0.30103	45	0	0	45
1059	4	CURI	-39.73	-73.39	5	1	0.35	11.6	0	5	29	0	89	123	0.92	5.43478	31.5217	0	96.7391	133.696	1.10037	0	45	0	0	45
1060	4	CURI	-39.73	-73.39	5	1	0.28	10.9	0	5	29	0	89	123	0.92	5.43478	31.5217	0	96.7391	133.696	1.07555	0	45	0	0	45
1061	4	CURI	-39.73	-73.39	5	1	0.58	13.1	0	5	29	0	89	123	0.92	5.43478	31.5217	0	96.7391	133.696	1.14922	0	45	0	0	45
1062	4	CURI	-39.73	-73.39	5	1	0.77	14.5	0	5	29	0	89	123	0.92	5.43478	31.5217	0	96.7391	133.696	1.19033	0	45	0	0	45
1063	4	CURI	-39.73	-73.39	5	2	0.47	12.7	0	5	29	0	89	123	0.92	5.43478	31.5217	0	96.7391	133.696	1.13672	0	45	0	0	45
1064	4	CURI	-39.73	-73.39	5	1	0.78	13	2	5	29	0	89	123	0.92	5.43478	31.5217	0	96.7391	133.696	1.14613	0.477121	45	0	0	45
1065	4	CURI	-39.73	-73.39	5	3	1.66	18	1	5	29	0	89	123	0.92	5.43478	31.5217	0	96.7391	133.696	1.27875	0.30103	45	0	0	45
1066	4	CURI	-39.73	-73.39	5	2	0.59	13.4	0	5	29	0	89	123	0.92	5.43478	31.5217	0	96.7391	133.696	1.15836	0	45	0	0	45
1067	4	CURI	-39.73	-73.39	5	3	1.76	17.6	2	5	29	0	89	123	0.92	5.43478	31.5217	0	96.7391	133.696	1.26951	0.477121	45	0	0	45
1068	4	CURI	-39.73	-73.39	5	1	0.8	14.2	2	5	29	0	89	123	0.92	5.43478	31.5217	0	96.7391	133.696	1.18184	0.477121	45	0	0	45
1069	4	CURI	-39.73	-73.39	5	1	0.87	13.5	2	5	29	0	89	123	0.92	5.43478	31.5217	0	96.7391	133.696	1.16137	0.477121	45	0	0	45
1070	4	CURI	-39.73	-73.39	5	1	0.68	14	2	5	29	0	89	123	0.92	5.43478	31.5217	0	96.7391	133.696	1.17609	0.477121	45	0	0	45
1071	4	CURI	-39.73	-73.39	5	1	0.65	12.7	2	5	29	0	89	123	0.92	5.43478	31.5217	0	96.7391	133.696	1.13672	0.477121	45	0	0	45
1072	4	CURI	-39.73	-73.39	5	1	0.88	14.8	3	5	29	0	89	123	0.92	5.43478	31.5217	0	96.7391	133.696	1.19866	0.60206	45	0	0	45
1073	4	CURI	-39.73	-73.39	5	1	0.5	12.8	0	5	29	0	89	123	0.92	5.43478	31.5217	0	96.7391	133.696	1.13988	0	45	0	0	45
1074	4	CURI	-39.73	-73.39	5	1	0.86	14.1	2	5	29	0	89	123	0.92	5.43478	31.5217	0	96.7391	133.696	1.17898	0.477121	45	0	0	45
1075	4	CURI	-39.73	-73.39	5	1	0.59	13.5	3	5	29	0	89	123	0.92	5.43478	31.5217	0	96.7391	133.696	1.16137	0.60206	45	0	0	45
1076	4	CURI	-39.73	-73.39	5	2	0.44	12.2	0	5	29	0	89	123	0.92	5.43478	31.5217	0	96.7391	133.696	1.12057	0	45	0	0	45
1077	4	CURI	-39.73	-73.39	5	1	0.29	10.5	1	5	29	0	89	123	0.92	5.43478	31.5217	0	96.7391	133.696	1.0607	0.30103	45	0	0	45
1078	4	CURI	-39.73	-73.39	5	1	0.18	10.9	0	5	29	0	89	123	0.92	5.43478	31.5217	0	96.7391	133.696	1.07555	0	45	0	0	45
1079	4	CURI	-39.73	-73.39	5	1	0.23	9.4	0	5	29	0	89	123	0.92	5.43478	31.5217	0	96.7391	133.696	1.01703	0	45	0	0	45
1080	4	CURI	-39.73	-73.39	5	2	0.3	10.5	0	5	29	0	89	123	0.92	5.43478	31.5217	0	96.7391	133.696	1.0607	0	45	0	0	45
1081	4	CURI	-39.73	-73.39	5	1	0.16	9.1	0	5	29	0	89	123	0.92	5.43478	31.5217	0	96.7391	133.696	1.00432	0	45	0	0	45
1082	4	CURI	-39.73	-73.39	5	2	0.25	9.7	0	5	29	0	89	123	0.92	5.43478	31.5217	0	96.7391	133.696	1.02938	0	45	0	0	45
1083	4	CURI	-39.73	-73.39	5	1	0.34	10.9	3	5	29	0	89	123	0.92	5.43478	31.5217	0	96.7391	133.696	1.07555	0.60206	45	0	0	45
1084	4	CURI	-39.73	-73.39	5	2	0.27	10.3	0	5	29	0	89	123	0.92	5.43478	31.5217	0	96.7391	133.696	1.05308	0	45	0	0	45
1085	4	CURI	-39.73	-73.39	5	1	0.27	11	0	5	29	0	89	123	0.92	5.43478	31.5217	0	96.7391	133.696	1.07918	0	45	0	0	45
1086	4	CURI	-39.73	-73.39	5	1	0.29	10.2	0	5	29	0	89	123	0.92	5.43478	31.5217	0	96.7391	133.696	1.04922	0	45	0	0	45
1087	4	CURI	-39.73	-73.39	5	1	0.21	9.4	0	5	29	0	89	123	0.92	5.43478	31.5217	0	96.7391	133.696	1.01703	0	45	0	0	45
1088	4	CURI	-39.73	-73.39	5	2	0.24	9.8	0	5	29	0	89	123	0.92	5.43478	31.5217	0	96.7391	133.696	1.03342	0	45	0	0	45
1089	4	CURI	-39.73	-73.39	5	1	0.19	9	0	5	29	0	89	123	0.92	5.43478	31.5217	0	96.7391	133.696	1	0	45	0	0	45
1090	4	CURI	-39.73	-73.39	5	2	0.21	9.7	0	5	29	0	89	123	0.92	5.43478	31.5217	0	96.7391	133.696	1.02938	0	45	0	0	45
1091	4	CURI	-39.73	-73.39	5	1	0.18	9.2	0	5	29	0	89	123	0.92	5.43478	31.5217	0	96.7391	133.696	1.0086	0	45	0	0	45
1092	4	CURI	-39.73	-73.39	5	1	0.17	9.3	0	5	29	0	89	123	0.92	5.43478	31.5217	0	96.7391	133.696	1.01284	0	45	0	0	45
1093	4	CURI	-39.73	-73.39	5	1	0.17	8.8	0	5	29	0	89	123	0.92	5.43478	31.5217	0	96.7391	133.696	0.991226	0	45	0	0	45
1094	4	CURI	-39.73	-73.39	5	1	0.1	8	0	5	29	0	89	123	0.92	5.43478	31.5217	0	96.7391	133.696	0.954243	0	45	0	0	45
1095	4	CURI	-39.73	-73.39	5	1	0.12	8.3	0	5	29	0	89	123	0.92	5.43478	31.5217	0	96.7391	133.696	0.968483	0	45	0	0	45
1096	4	CURI	-39.73	-73.39	5	2	0.2	10.2	0	5	29	0	89	123	0.92	5.43478	31.5217	0	96.7391	133.696	1.04922	0	45	0	0	45
1097	4	CURI	-39.73	-73.39	5	1	0.16	8.6	0	5	29	0	89	123	0.92	5.43478	31.5217	0	96.7391	133.696	0.982271	0	45	0	0	45
1098	4	CURI	-39.73	-73.39	5	1	0.05	7.2	0	5	29	0	89	123	0.92	5.43478	31.5217	0	96.7391	133.696	0.913814	0	45	0	0	45
1099	4	CURI	-39.73	-73.39	5	1	0.05	6.8	0	5	29	0	89	123	0.92	5.43478	31.5217	0	96.7391	133.696	0.892095	0	45	0	0	45
1100	4	CURI	-39.73	-73.39	5	2	11.72	30.2	0	5	29	0	89	123	0.92	5.43478	31.5217	0	96.7391	133.696	1.49415	0	45	0	0	45
1101	1	CALF	-39.79	-73.39	6	3	5.78	26.2	3	21	233	0	11	265	0.8	26.25	291.25	0	13.75	331.25	1.43457	0.60206	2	4	0	6
1102	1	CALF	-39.79	-73.39	6	3	4.47	23.8	2	21	233	0	11	265	0.8	26.25	291.25	0	13.75	331.25	1.39445	0.477121	2	4	0	6
1103	1	CALF	-39.79	-73.39	6	2	6.8	27.3	6	21	233	0	11	265	0.8	26.25	291.25	0	13.75	331.25	1.45179	0.845098	2	4	0	6
1104	1	CALF	-39.79	-73.39	6	2	5.45	26.6	1	21	233	0	11	265	0.8	26.25	291.25	0	13.75	331.25	1.44091	0.30103	2	4	0	6
1105	1	CALF	-39.79	-73.39	6	2	5.75	26.9	3	21	233	0	11	265	0.8	26.25	291.25	0	13.75	331.25	1.4456	0.60206	2	4	0	6
1106	1	CALF	-39.79	-73.39	6	2	4.16	24.3	8	21	233	0	11	265	0.8	26.25	291.25	0	13.75	331.25	1.40312	0.954243	2	4	0	6
1107	1	CALF	-39.79	-73.39	6	2	4.97	25.7	3	21	233	0	11	265	0.8	26.25	291.25	0	13.75	331.25	1.42651	0.60206	2	4	0	6
1108	1	CALF	-39.79	-73.39	6	2	3.22	22.4	5	21	233	0	11	265	0.8	26.25	291.25	0	13.75	331.25	1.36922	0.778151	2	4	0	6
1109	1	CALF	-39.79	-73.39	6	2	4.85	25.2	3	21	233	0	11	265	0.8	26.25	291.25	0	13.75	331.25	1.4183	0.60206	2	4	0	6
1110	1	CALF	-39.79	-73.39	6	2	3.69	24.1	6	21	233	0	11	265	0.8	26.25	291.25	0	13.75	331.25	1.39967	0.845098	2	4	0	6
1111	1	CALF	-39.79	-73.39	6	2	4.7	24.4	2	21	233	0	11	265	0.8	26.25	291.25	0	13.75	331.25	1.40483	0.477121	2	4	0	6
1112	1	CALF	-39.79	-73.39	6	2	4.26	24.8	4	21	233	0	11	265	0.8	26.25	291.25	0	13.75	331.25	1.41162	0.69897	2	4	0	6
1113	1	CALF	-39.79	-73.39	6	2	5.25	26.6	1	21	233	0	11	265	0.8	26.25	291.25	0	13.75	331.25	1.44091	0.30103	2	4	0	6
1114	1	CALF	-39.79	-73.39	6	2	5.53	26.1	2	21	233	0	11	265	0.8	26.25	291.25	0	13.75	331.25	1.43297	0.477121	2	4	0	6
1115	1	CALF	-39.79	-73.39	6	2	4.49	25.4	0	21	233	0	11	265	0.8	26.25	291.25	0	13.75	331.25	1.4216	0	2	4	0	6
1116	1	CALF	-39.79	-73.39	6	3	6.28	27.2	3	21	233	0	11	265	0.8	26.25	291.25	0	13.75	331.25	1.45025	0.60206	2	4	0	6
1117	1	CALF	-39.79	-73.39	6	2	3.93	23.8	4	21	233	0	11	265	0.8	26.25	291.25	0	13.75	331.25	1.39445	0.69897	2	4	0	6
1118	1	CALF	-39.79	-73.39	6	2	4.3	24.5	4	21	233	0	11	265	0.8	26.25	291.25	0	13.75	331.25	1.40654	0.69897	2	4	0	6
1119	1	CALF	-39.79	-73.39	6	2	2.35	20.4	2	21	233	0	11	265	0.8	26.25	291.25	0	13.75	331.25	1.33041	0.477121	2	4	0	6
1120	1	CALF	-39.79	-73.39	6	1	0.88	14.4	0	21	233	0	11	265	0.8	26.25	291.25	0	13.75	331.25	1.18752	0	2	4	0	6
1121	1	CALF	-39.79	-73.39	6	1	0.94	15	2	21	233	0	11	265	0.8	26.25	291.25	0	13.75	331.25	1.20412	0.477121	2	4	0	6
1122	1	CALF	-39.79	-73.39	6	1	0.87	14.2	0	21	233	0	11	265	0.8	26.25	291.25	0	13.75	331.25	1.18184	0	2	4	0	6
1123	1	CALF	-39.79	-73.39	6	1	0.64	13.3	0	21	233	0	11	265	0.8	26.25	291.25	0	13.75	331.25	1.15534	0	2	4	0	6
1124	1	CALF	-39.79	-73.39	6	1	0.52	12.2	0	21	233	0	11	265	0.8	26.25	291.25	0	13.75	331.25	1.12057	0	2	4	0	6
1125	1	CALF	-39.79	-73.39	6	1	0.58	12.8	3	21	233	0	11	265	0.8	26.25	291.25	0	13.75	331.25	1.13988	0.60206	2	4	0	6
1126	1	CALF	-39.79	-73.39	6	2	0.65	13.4	0	21	233	0	11	265	0.8	26.25	291.25	0	13.75	331.25	1.15836	0	2	4	0	6
1127	1	CALF	-39.79	-73.39	6	1	0.53	13.4	1	21	233	0	11	265	0.8	26.25	291.25	0	13.75	331.25	1.15836	0.30103	2	4	0	6
1128	1	CALF	-39.79	-73.39	6	1	0.62	13.3	2	21	233	0	11	265	0.8	26.25	291.25	0	13.75	331.25	1.15534	0.477121	2	4	0	6
1129	1	CALF	-39.79	-73.39	6	1	0.53	12.7	2	21	233	0	11	265	0.8	26.25	291.25	0	13.75	331.25	1.13672	0.477121	2	4	0	6
1130	1	CALF	-39.79	-73.39	6	1	0.65	13	1	21	233	0	11	265	0.8	26.25	291.25	0	13.75	331.25	1.14613	0.30103	2	4	0	6
1131	1	CALF	-39.79	-73.39	6	1	0.49	12.1	0	21	233	0	11	265	0.8	26.25	291.25	0	13.75	331.25	1.11727	0	2	4	0	6
1132	1	CALF	-39.79	-73.39	6	2	0.35	11.4	0	21	233	0	11	265	0.8	26.25	291.25	0	13.75	331.25	1.09342	0	2	4	0	6
1133	1	CALF	-39.79	-73.39	6	1	0.26	9.5	0	21	233	0	11	265	0.8	26.25	291.25	0	13.75	331.25	1.02119	0	2	4	0	6
1134	1	CALF	-39.79	-73.39	6	1	0.22	9.2	0	21	233	0	11	265	0.8	26.25	291.25	0	13.75	331.25	1.0086	0	2	4	0	6
1135	2	CALF	-39.79	-73.39	6	2	7.7	30.6	8	21	233	0	11	265	0.8	26.25	291.25	0	13.75	331.25	1.49969	0.954243	2	4	0	6
1136	2	CALF	-39.79	-73.39	6	2	9.01	30.7	18	21	233	0	11	265	0.8	26.25	291.25	0	13.75	331.25	1.50106	1.27875	2	4	0	6
1137	2	CALF	-39.79	-73.39	6	2	6.1	28.1	6	21	233	0	11	265	0.8	26.25	291.25	0	13.75	331.25	1.46389	0.845098	2	4	0	6
1138	2	CALF	-39.79	-73.39	6	2	5.4	26.4	6	21	233	0	11	265	0.8	26.25	291.25	0	13.75	331.25	1.43775	0.845098	2	4	0	6
1139	2	CALF	-39.79	-73.39	6	3	5.68	25	6	21	233	0	11	265	0.8	26.25	291.25	0	13.75	331.25	1.41497	0.845098	2	4	0	6
1140	2	CALF	-39.79	-73.39	6	3	5.15	26	3	21	233	0	11	265	0.8	26.25	291.25	0	13.75	331.25	1.43136	0.60206	2	4	0	6
1141	2	CALF	-39.79	-73.39	6	2	4.95	24.5	8	21	233	0	11	265	0.8	26.25	291.25	0	13.75	331.25	1.40654	0.954243	2	4	0	6
1142	2	CALF	-39.79	-73.39	6	2	3.95	24.8	2	21	233	0	11	265	0.8	26.25	291.25	0	13.75	331.25	1.41162	0.477121	2	4	0	6
1143	2	CALF	-39.79	-73.39	6	2	3.92	23.3	5	21	233	0	11	265	0.8	26.25	291.25	0	13.75	331.25	1.38561	0.778151	2	4	0	6
1144	2	CALF	-39.79	-73.39	6	2	3.94	23.1	0	21	233	0	11	265	0.8	26.25	291.25	0	13.75	331.25	1.38202	0	2	4	0	6
1145	2	CALF	-39.79	-73.39	6	2	3.84	23.3	5	21	233	0	11	265	0.8	26.25	291.25	0	13.75	331.25	1.38561	0.778151	2	4	0	6
1146	2	CALF	-39.79	-73.39	6	1	4.08	25.1	6	21	233	0	11	265	0.8	26.25	291.25	0	13.75	331.25	1.41664	0.845098	2	4	0	6
1147	2	CALF	-39.79	-73.39	6	2	3.55	24.2	2	21	233	0	11	265	0.8	26.25	291.25	0	13.75	331.25	1.4014	0.477121	2	4	0	6
1148	2	CALF	-39.79	-73.39	6	2	4.34	23.8	2	21	233	0	11	265	0.8	26.25	291.25	0	13.75	331.25	1.39445	0.477121	2	4	0	6
1149	2	CALF	-39.79	-73.39	6	2	3.62	23.2	3	21	233	0	11	265	0.8	26.25	291.25	0	13.75	331.25	1.38382	0.60206	2	4	0	6
1150	2	CALF	-39.79	-73.39	6	2	2.61	20	1	21	233	0	11	265	0.8	26.25	291.25	0	13.75	331.25	1.32222	0.30103	2	4	0	6
1151	2	CALF	-39.79	-73.39	6	2	2.3	21	1	21	233	0	11	265	0.8	26.25	291.25	0	13.75	331.25	1.34242	0.30103	2	4	0	6
1152	2	CALF	-39.79	-73.39	6	2	2.48	20.1	1	21	233	0	11	265	0.8	26.25	291.25	0	13.75	331.25	1.32428	0.30103	2	4	0	6
1153	2	CALF	-39.79	-73.39	6	2	2.21	19.1	2	21	233	0	11	265	0.8	26.25	291.25	0	13.75	331.25	1.3032	0.477121	2	4	0	6
1154	2	CALF	-39.79	-73.39	6	2	2.38	20	4	21	233	0	11	265	0.8	26.25	291.25	0	13.75	331.25	1.32222	0.69897	2	4	0	6
1155	2	CALF	-39.79	-73.39	6	2	1.18	15.8	0	21	233	0	11	265	0.8	26.25	291.25	0	13.75	331.25	1.22531	0	2	4	0	6
1156	2	CALF	-39.79	-73.39	6	2	1.24	15.5	1	21	233	0	11	265	0.8	26.25	291.25	0	13.75	331.25	1.21748	0.30103	2	4	0	6
1157	2	CALF	-39.79	-73.39	6	1	0.9	14.3	0	21	233	0	11	265	0.8	26.25	291.25	0	13.75	331.25	1.18469	0	2	4	0	6
1158	2	CALF	-39.79	-73.39	6	1	0.73	12.6	1	21	233	0	11	265	0.8	26.25	291.25	0	13.75	331.25	1.13354	0.30103	2	4	0	6
1159	2	CALF	-39.79	-73.39	6	1	0.95	14	0	21	233	0	11	265	0.8	26.25	291.25	0	13.75	331.25	1.17609	0	2	4	0	6
1160	2	CALF	-39.79	-73.39	6	1	0.96	14.1	1	21	233	0	11	265	0.8	26.25	291.25	0	13.75	331.25	1.17898	0.30103	2	4	0	6
1161	2	CALF	-39.79	-73.39	6	1	67	13	0	21	233	0	11	265	0.8	26.25	291.25	0	13.75	331.25	1.14613	0	2	4	0	6
1162	2	CALF	-39.79	-73.39	6	1	1.07	15	0	21	233	0	11	265	0.8	26.25	291.25	0	13.75	331.25	1.20412	0	2	4	0	6
1163	2	CALF	-39.79	-73.39	6	1	0.91	13.4	2	21	233	0	11	265	0.8	26.25	291.25	0	13.75	331.25	1.15836	0.477121	2	4	0	6
1164	2	CALF	-39.79	-73.39	6	1	0.99	14.7	4	21	233	0	11	265	0.8	26.25	291.25	0	13.75	331.25	1.1959	0.69897	2	4	0	6
1165	2	CALF	-39.79	-73.39	6	1	0.68	14.1	0	21	233	0	11	265	0.8	26.25	291.25	0	13.75	331.25	1.17898	0	2	4	0	6
1166	2	CALF	-39.79	-73.39	6	1	0.87	14.3	3	21	233	0	11	265	0.8	26.25	291.25	0	13.75	331.25	1.18469	0.60206	2	4	0	6
1167	2	CALF	-39.79	-73.39	6	1	0.71	13.3	3	21	233	0	11	265	0.8	26.25	291.25	0	13.75	331.25	1.15534	0.60206	2	4	0	6
1168	2	CALF	-39.79	-73.39	6	1	0.64	12.4	0	21	233	0	11	265	0.8	26.25	291.25	0	13.75	331.25	1.1271	0	2	4	0	6
1169	2	CALF	-39.79	-73.39	6	1	0.58	12	0	21	233	0	11	265	0.8	26.25	291.25	0	13.75	331.25	1.11394	0	2	4	0	6
1170	2	CALF	-39.79	-73.39	6	1	0.42	11.1	0	21	233	0	11	265	0.8	26.25	291.25	0	13.75	331.25	1.08279	0	2	4	0	6
1171	2	CALF	-39.79	-73.39	6	1	0.84	13.7	2	21	233	0	11	265	0.8	26.25	291.25	0	13.75	331.25	1.16732	0.477121	2	4	0	6
1172	2	CALF	-39.79	-73.39	6	2	0.45	12	0	21	233	0	11	265	0.8	26.25	291.25	0	13.75	331.25	1.11394	0	2	4	0	6
1173	2	CALF	-39.79	-73.39	6	2	0.54	12	0	21	233	0	11	265	0.8	26.25	291.25	0	13.75	331.25	1.11394	0	2	4	0	6
1174	2	CALF	-39.79	-73.39	6	2	0.36	10.6	0	21	233	0	11	265	0.8	26.25	291.25	0	13.75	331.25	1.06446	0	2	4	0	6
1175	2	CALF	-39.79	-73.39	6	1	0.24	9.6	0	21	233	0	11	265	0.8	26.25	291.25	0	13.75	331.25	1.02531	0	2	4	0	6
1176	2	CALF	-39.79	-73.39	6	1	0.27	9.9	0	21	233	0	11	265	0.8	26.25	291.25	0	13.75	331.25	1.03743	0	2	4	0	6
1177	3	CALF	-39.79	-73.39	6	2	5.53	26	6	21	233	0	11	265	0.8	26.25	291.25	0	13.75	331.25	1.43136	0.845098	2	4	0	6
1178	3	CALF	-39.79	-73.39	6	1	3.27	23.2	1	21	233	0	11	265	0.8	26.25	291.25	0	13.75	331.25	1.38382	0.30103	2	4	0	6
1179	3	CALF	-39.79	-73.39	6	1	4.98	24.1	1	21	233	0	11	265	0.8	26.25	291.25	0	13.75	331.25	1.39967	0.30103	2	4	0	6
1180	3	CALF	-39.79	-73.39	6	1	6.66	27.7	6	21	233	0	11	265	0.8	26.25	291.25	0	13.75	331.25	1.45788	0.845098	2	4	0	6
1181	3	CALF	-39.79	-73.39	6	1	5.48	24.7	2	21	233	0	11	265	0.8	26.25	291.25	0	13.75	331.25	1.40993	0.477121	2	4	0	6
1182	3	CALF	-39.79	-73.39	6	1	4.59	24.2	6	21	233	0	11	265	0.8	26.25	291.25	0	13.75	331.25	1.4014	0.845098	2	4	0	6
1183	3	CALF	-39.79	-73.39	6	1	6.37	28	3	21	233	0	11	265	0.8	26.25	291.25	0	13.75	331.25	1.4624	0.60206	2	4	0	6
1184	3	CALF	-39.79	-73.39	6	1	2.79	19.5	0	21	233	0	11	265	0.8	26.25	291.25	0	13.75	331.25	1.31175	0	2	4	0	6
1185	3	CALF	-39.79	-73.39	6	1	9.4	29.6	15	21	233	0	11	265	0.8	26.25	291.25	0	13.75	331.25	1.48572	1.20412	2	4	0	6
1186	3	CALF	-39.79	-73.39	6	1	5.01	25	3	21	233	0	11	265	0.8	26.25	291.25	0	13.75	331.25	1.41497	0.60206	2	4	0	6
1187	3	CALF	-39.79	-73.39	6	1	4.52	25.4	1	21	233	0	11	265	0.8	26.25	291.25	0	13.75	331.25	1.4216	0.30103	2	4	0	6
1188	3	CALF	-39.79	-73.39	6	1	6.96	28.1	4	21	233	0	11	265	0.8	26.25	291.25	0	13.75	331.25	1.46389	0.69897	2	4	0	6
1189	3	CALF	-39.79	-73.39	6	1	5.17	25.7	3	21	233	0	11	265	0.8	26.25	291.25	0	13.75	331.25	1.42651	0.60206	2	4	0	6
1190	3	CALF	-39.79	-73.39	6	1	4.93	26.7	3	21	233	0	11	265	0.8	26.25	291.25	0	13.75	331.25	1.44248	0.60206	2	4	0	6
1191	3	CALF	-39.79	-73.39	6	1	3.82	23.4	3	21	233	0	11	265	0.8	26.25	291.25	0	13.75	331.25	1.38739	0.60206	2	4	0	6
1192	3	CALF	-39.79	-73.39	6	1	3.92	23.1	1	21	233	0	11	265	0.8	26.25	291.25	0	13.75	331.25	1.38202	0.30103	2	4	0	6
1193	3	CALF	-39.79	-73.39	6	1	4.6	25.4	3	21	233	0	11	265	0.8	26.25	291.25	0	13.75	331.25	1.4216	0.60206	2	4	0	6
1194	3	CALF	-39.79	-73.39	6	1	4.24	25.4	4	21	233	0	11	265	0.8	26.25	291.25	0	13.75	331.25	1.4216	0.69897	2	4	0	6
1195	3	CALF	-39.79	-73.39	6	1	1.77	18.3	0	21	233	0	11	265	0.8	26.25	291.25	0	13.75	331.25	1.28556	0	2	4	0	6
1196	3	CALF	-39.79	-73.39	6	1	4.42	23.7	3	21	233	0	11	265	0.8	26.25	291.25	0	13.75	331.25	1.3927	0.60206	2	4	0	6
1197	3	CALF	-39.79	-73.39	6	1	4.42	23.5	3	21	233	0	11	265	0.8	26.25	291.25	0	13.75	331.25	1.38917	0.60206	2	4	0	6
1198	3	CALF	-39.79	-73.39	6	1	4.42	23	0	21	233	0	11	265	0.8	26.25	291.25	0	13.75	331.25	1.38021	0	2	4	0	6
1199	3	CALF	-39.79	-73.39	6	2	2.46	19.7	3	21	233	0	11	265	0.8	26.25	291.25	0	13.75	331.25	1.31597	0.60206	2	4	0	6
1200	3	CALF	-39.79	-73.39	6	1	1.16	14.8	2	21	233	0	11	265	0.8	26.25	291.25	0	13.75	331.25	1.19866	0.477121	2	4	0	6
1201	3	CALF	-39.79	-73.39	6	1	0.96	14.5	1	21	233	0	11	265	0.8	26.25	291.25	0	13.75	331.25	1.19033	0.30103	2	4	0	6
1202	3	CALF	-39.79	-73.39	6	2	0.47	12.1	0	21	233	0	11	265	0.8	26.25	291.25	0	13.75	331.25	1.11727	0	2	4	0	6
1203	3	CALF	-39.79	-73.39	6	1	0.74	14	0	21	233	0	11	265	0.8	26.25	291.25	0	13.75	331.25	1.17609	0	2	4	0	6
1204	3	CALF	-39.79	-73.39	6	2	1.36	16.5	3	21	233	0	11	265	0.8	26.25	291.25	0	13.75	331.25	1.24304	0.60206	2	4	0	6
1205	3	CALF	-39.79	-73.39	6	1	0.78	14.3	2	21	233	0	11	265	0.8	26.25	291.25	0	13.75	331.25	1.18469	0.477121	2	4	0	6
1206	3	CALF	-39.79	-73.39	6	1	0.79	14.5	1	21	233	0	11	265	0.8	26.25	291.25	0	13.75	331.25	1.19033	0.30103	2	4	0	6
1207	3	CALF	-39.79	-73.39	6	1	1.04	15	0	21	233	0	11	265	0.8	26.25	291.25	0	13.75	331.25	1.20412	0	2	4	0	6
1208	3	CALF	-39.79	-73.39	6	1	0.82	14.1	1	21	233	0	11	265	0.8	26.25	291.25	0	13.75	331.25	1.17898	0.30103	2	4	0	6
1209	3	CALF	-39.79	-73.39	6	1	0.71	13.4	1	21	233	0	11	265	0.8	26.25	291.25	0	13.75	331.25	1.15836	0.30103	2	4	0	6
1210	3	CALF	-39.79	-73.39	6	1	0.78	14.3	2	21	233	0	11	265	0.8	26.25	291.25	0	13.75	331.25	1.18469	0.477121	2	4	0	6
1211	3	CALF	-39.79	-73.39	6	1	0.84	15.3	2	21	233	0	11	265	0.8	26.25	291.25	0	13.75	331.25	1.21219	0.477121	2	4	0	6
1212	3	CALF	-39.79	-73.39	6	1	0.53	12.8	0	21	233	0	11	265	0.8	26.25	291.25	0	13.75	331.25	1.13988	0	2	4	0	6
1213	3	CALF	-39.79	-73.39	6	1	0.53	13.2	0	21	233	0	11	265	0.8	26.25	291.25	0	13.75	331.25	1.15229	0	2	4	0	6
1214	3	CALF	-39.79	-73.39	6	1	0.59	13	1	21	233	0	11	265	0.8	26.25	291.25	0	13.75	331.25	1.14613	0.30103	2	4	0	6
1215	3	CALF	-39.79	-73.39	6	1	0.53	11.8	2	21	233	0	11	265	0.8	26.25	291.25	0	13.75	331.25	1.10721	0.477121	2	4	0	6
1216	3	CALF	-39.79	-73.39	6	1	0.49	12	0	21	233	0	11	265	0.8	26.25	291.25	0	13.75	331.25	1.11394	0	2	4	0	6
1217	3	CALF	-39.79	-73.39	6	2	0.4	11.1	0	21	233	0	11	265	0.8	26.25	291.25	0	13.75	331.25	1.08279	0	2	4	0	6
1218	3	CALF	-39.79	-73.39	6	1	0.49	12	0	21	233	0	11	265	0.8	26.25	291.25	0	13.75	331.25	1.11394	0	2	4	0	6
1219	3	CALF	-39.79	-73.39	6	1	0.32	10.8	0	21	233	0	11	265	0.8	26.25	291.25	0	13.75	331.25	1.07188	0	2	4	0	6
1220	3	CALF	-39.79	-73.39	6	1	0.42	11.8	0	21	233	0	11	265	0.8	26.25	291.25	0	13.75	331.25	1.10721	0	2	4	0	6
1221	3	CALF	-39.79	-73.39	6	1	0.22	9.5	0	21	233	0	11	265	0.8	26.25	291.25	0	13.75	331.25	1.02119	0	2	4	0	6
1222	3	CALF	-39.79	-73.39	6	1	0.53	12.8	0	21	233	0	11	265	0.8	26.25	291.25	0	13.75	331.25	1.13988	0	2	4	0	6
1223	3	CALF	-39.79	-73.39	6	1	0.63	12.5	0	21	233	0	11	265	0.8	26.25	291.25	0	13.75	331.25	1.13033	0	2	4	0	6
1224	3	CALF	-39.79	-73.39	6	1	0.22	10	0	21	233	0	11	265	0.8	26.25	291.25	0	13.75	331.25	1.04139	0	2	4	0	6
1225	3	CALF	-39.79	-73.39	6	1	0.14	9	0	21	233	0	11	265	0.8	26.25	291.25	0	13.75	331.25	1	0	2	4	0	6
1226	3	CALF	-39.79	-73.39	6	1	0.4	11.6	0	21	233	0	11	265	0.8	26.25	291.25	0	13.75	331.25	1.10037	0	2	4	0	6
1227	3	CALF	-39.79	-73.39	6	1	0.75	12.7	0	21	233	0	11	265	0.8	26.25	291.25	0	13.75	331.25	1.13672	0	2	4	0	6
1228	3	CALF	-39.79	-73.39	6	2	0.63	13.5	0	21	233	0	11	265	0.8	26.25	291.25	0	13.75	331.25	1.16137	0	2	4	0	6
1229	3	CALF	-39.79	-73.39	6	1	0.51	12	0	21	233	0	11	265	0.8	26.25	291.25	0	13.75	331.25	1.11394	0	2	4	0	6
1230	3	CALF	-39.79	-73.39	6	1	0.45	11.6	0	21	233	0	11	265	0.8	26.25	291.25	0	13.75	331.25	1.10037	0	2	4	0	6
1231	3	CALF	-39.79	-73.39	6	1	0.23	10.5	0	21	233	0	11	265	0.8	26.25	291.25	0	13.75	331.25	1.0607	0	2	4	0	6
1232	3	CALF	-39.79	-73.39	6	2	0.26	10.2	0	21	233	0	11	265	0.8	26.25	291.25	0	13.75	331.25	1.04922	0	2	4	0	6
1233	3	CALF	-39.79	-73.39	6	1	0.2	9.7	0	21	233	0	11	265	0.8	26.25	291.25	0	13.75	331.25	1.02938	0	2	4	0	6
1234	3	CALF	-39.79	-73.39	6	1	0.21	10.2	0	21	233	0	11	265	0.8	26.25	291.25	0	13.75	331.25	1.04922	0	2	4	0	6
1235	4	CALF	-39.79	-73.39	6	2	0.32	24.6	2	21	233	0	11	265	0.8	26.25	291.25	0	13.75	331.25	1.40824	0.477121	2	4	0	6
1236	4	CALF	-39.79	-73.39	6	2	4.08	23.8	9	21	233	0	11	265	0.8	26.25	291.25	0	13.75	331.25	1.39445	1	2	4	0	6
1237	4	CALF	-39.79	-73.39	6	2	6.53	28.4	11	21	233	0	11	265	0.8	26.25	291.25	0	13.75	331.25	1.46835	1.07918	2	4	0	6
1238	4	CALF	-39.79	-73.39	6	2	4.76	29.6	3	21	233	0	11	265	0.8	26.25	291.25	0	13.75	331.25	1.48572	0.60206	2	4	0	6
1239	4	CALF	-39.79	-73.39	6	2	5.15	26.6	6	21	233	0	11	265	0.8	26.25	291.25	0	13.75	331.25	1.44091	0.845098	2	4	0	6
1240	4	CALF	-39.79	-73.39	6	2	4.17	24.1	4	21	233	0	11	265	0.8	26.25	291.25	0	13.75	331.25	1.39967	0.69897	2	4	0	6
1241	4	CALF	-39.79	-73.39	6	2	6.26	26.7	3	21	233	0	11	265	0.8	26.25	291.25	0	13.75	331.25	1.44248	0.60206	2	4	0	6
1242	4	CALF	-39.79	-73.39	6	2	4.55	24.5	6	21	233	0	11	265	0.8	26.25	291.25	0	13.75	331.25	1.40654	0.845098	2	4	0	6
1243	4	CALF	-39.79	-73.39	6	2	4.4	24.4	4	21	233	0	11	265	0.8	26.25	291.25	0	13.75	331.25	1.40483	0.69897	2	4	0	6
1244	4	CALF	-39.79	-73.39	6	2	4.28	25.6	6	21	233	0	11	265	0.8	26.25	291.25	0	13.75	331.25	1.42488	0.845098	2	4	0	6
1245	4	CALF	-39.79	-73.39	6	2	4.93	24.6	2	21	233	0	11	265	0.8	26.25	291.25	0	13.75	331.25	1.40824	0.477121	2	4	0	6
1246	4	CALF	-39.79	-73.39	6	2	1.14	16.2	1	21	233	0	11	265	0.8	26.25	291.25	0	13.75	331.25	1.23553	0.30103	2	4	0	6
1247	4	CALF	-39.79	-73.39	6	1	0.92	14.1	3	21	233	0	11	265	0.8	26.25	291.25	0	13.75	331.25	1.17898	0.60206	2	4	0	6
1248	4	CALF	-39.79	-73.39	6	1	0.88	15.2	2	21	233	0	11	265	0.8	26.25	291.25	0	13.75	331.25	1.20952	0.477121	2	4	0	6
1249	4	CALF	-39.79	-73.39	6	1	1.12	14.1	1	21	233	0	11	265	0.8	26.25	291.25	0	13.75	331.25	1.17898	0.30103	2	4	0	6
1250	4	CALF	-39.79	-73.39	6	1	0.65	13	0	21	233	0	11	265	0.8	26.25	291.25	0	13.75	331.25	1.14613	0	2	4	0	6
1251	4	CALF	-39.79	-73.39	6	1	1.05	16.1	1	21	233	0	11	265	0.8	26.25	291.25	0	13.75	331.25	1.233	0.30103	2	4	0	6
1252	4	CALF	-39.79	-73.39	6	1	0.88	14.5	1	21	233	0	11	265	0.8	26.25	291.25	0	13.75	331.25	1.19033	0.30103	2	4	0	6
1253	4	CALF	-39.79	-73.39	6	1	0.65	14.5	3	21	233	0	11	265	0.8	26.25	291.25	0	13.75	331.25	1.19033	0.60206	2	4	0	6
1254	4	CALF	-39.79	-73.39	6	1	0.84	15	0	21	233	0	11	265	0.8	26.25	291.25	0	13.75	331.25	1.20412	0	2	4	0	6
1255	4	CALF	-39.79	-73.39	6	1	0.6	12.6	0	21	233	0	11	265	0.8	26.25	291.25	0	13.75	331.25	1.13354	0	2	4	0	6
1256	4	CALF	-39.79	-73.39	6	1	0.91	14.1	0	21	233	0	11	265	0.8	26.25	291.25	0	13.75	331.25	1.17898	0	2	4	0	6
1257	4	CALF	-39.79	-73.39	6	1	0.57	12.6	0	21	233	0	11	265	0.8	26.25	291.25	0	13.75	331.25	1.13354	0	2	4	0	6
1258	4	CALF	-39.79	-73.39	6	1	0.34	10.5	0	21	233	0	11	265	0.8	26.25	291.25	0	13.75	331.25	1.0607	0	2	4	0	6
1259	4	CALF	-39.79	-73.39	6	1	0.51	12	3	21	233	0	11	265	0.8	26.25	291.25	0	13.75	331.25	1.11394	0.60206	2	4	0	6
1260	4	CALF	-39.79	-73.39	6	1	0.26	10.2	0	21	233	0	11	265	0.8	26.25	291.25	0	13.75	331.25	1.04922	0	2	4	0	6
1261	4	CALF	-39.79	-73.39	6	1	0.25	10	0	21	233	0	11	265	0.8	26.25	291.25	0	13.75	331.25	1.04139	0	2	4	0	6
1262	4	CALF	-39.79	-73.39	6	1	0.2	9.7	0	21	233	0	11	265	0.8	26.25	291.25	0	13.75	331.25	1.02938	0	2	4	0	6
1263	4	CALF	-39.79	-73.39	6	1	0.18	9.4	0	21	233	0	11	265	0.8	26.25	291.25	0	13.75	331.25	1.01703	0	2	4	0	6
1264	1	CHAI	-39.94	-73.58	6	2	2.83	22.8	3	6	6	0	14	26	0.59	10.1695	10.1695	0	23.7288	44.0678	1.37658	0.60206	0	0	0	0
1265	1	CHAI	-39.94	-73.58	6	1	0.64	13.3	3	6	6	0	14	26	0.59	10.1695	10.1695	0	23.7288	44.0678	1.15534	0.60206	0	0	0	0
1266	1	CHAI	-39.94	-73.58	6	1	0.82	14.2	2	6	6	0	14	26	0.59	10.1695	10.1695	0	23.7288	44.0678	1.18184	0.477121	0	0	0	0
1267	1	CHAI	-39.94	-73.58	6	1	0.38	11.4	0	6	6	0	14	26	0.59	10.1695	10.1695	0	23.7288	44.0678	1.09342	0	0	0	0	0
1268	1	CHAI	-39.94	-73.58	6	1	0.41	11.8	2	6	6	0	14	26	0.59	10.1695	10.1695	0	23.7288	44.0678	1.10721	0.477121	0	0	0	0
1269	1	CHAI	-39.94	-73.58	6	1	0.27	10.4	0	6	6	0	14	26	0.59	10.1695	10.1695	0	23.7288	44.0678	1.0569	0	0	0	0	0
1270	1	CHAI	-39.94	-73.58	6	2	0.23	9.7	0	6	6	0	14	26	0.59	10.1695	10.1695	0	23.7288	44.0678	1.02938	0	0	0	0	0
1271	1	CHAI	-39.94	-73.58	6	1	0.23	10	0	6	6	0	14	26	0.59	10.1695	10.1695	0	23.7288	44.0678	1.04139	0	0	0	0	0
1272	1	CHAI	-39.94	-73.58	6	1	0.22	9.6	0	6	6	0	14	26	0.59	10.1695	10.1695	0	23.7288	44.0678	1.02531	0	0	0	0	0
1273	1	CHAI	-39.94	-73.58	6	2	0.23	9.7	0	6	6	0	14	26	0.59	10.1695	10.1695	0	23.7288	44.0678	1.02938	0	0	0	0	0
1274	1	CHAI	-39.94	-73.58	6	2	0.18	9.1	0	6	6	0	14	26	0.59	10.1695	10.1695	0	23.7288	44.0678	1.00432	0	0	0	0	0
1275	1	CHAI	-39.94	-73.58	6	1	0.24	9.7	0	6	6	0	14	26	0.59	10.1695	10.1695	0	23.7288	44.0678	1.02938	0	0	0	0	0
1276	1	CHAI	-39.94	-73.58	6	1	0.14	8.3	0	6	6	0	14	26	0.59	10.1695	10.1695	0	23.7288	44.0678	0.968483	0	0	0	0	0
1277	1	CHAI	-39.94	-73.58	6	1	0.16	9.1	0	6	6	0	14	26	0.59	10.1695	10.1695	0	23.7288	44.0678	1.00432	0	0	0	0	0
1278	1	CHAI	-39.94	-73.58	6	1	0.21	9.2	0	6	6	0	14	26	0.59	10.1695	10.1695	0	23.7288	44.0678	1.0086	0	0	0	0	0
1279	1	CHAI	-39.94	-73.58	6	1	0.15	8.6	0	6	6	0	14	26	0.59	10.1695	10.1695	0	23.7288	44.0678	0.982271	0	0	0	0	0
1280	2	CHAI	-39.94	-73.58	6	2	3.73	22.3	2	6	6	0	14	26	0.59	10.1695	10.1695	0	23.7288	44.0678	1.36736	0.477121	0	0	0	0
1281	2	CHAI	-39.94	-73.58	6	1	1.24	15.3	4	6	6	0	14	26	0.59	10.1695	10.1695	0	23.7288	44.0678	1.21219	0.69897	0	0	0	0
1282	2	CHAI	-39.94	-73.58	6	1	0.88	13.7	1	6	6	0	14	26	0.59	10.1695	10.1695	0	23.7288	44.0678	1.16732	0.30103	0	0	0	0
1283	2	CHAI	-39.94	-73.58	6	1	0.52	11.5	0	6	6	0	14	26	0.59	10.1695	10.1695	0	23.7288	44.0678	1.09691	0	0	0	0	0
1284	2	CHAI	-39.94	-73.58	6	1	0.62	12.2	0	6	6	0	14	26	0.59	10.1695	10.1695	0	23.7288	44.0678	1.12057	0	0	0	0	0
1285	2	CHAI	-39.94	-73.58	6	1	0.42	11.6	0	6	6	0	14	26	0.59	10.1695	10.1695	0	23.7288	44.0678	1.10037	0	0	0	0	0
1286	2	CHAI	-39.94	-73.58	6	1	0.25	9.6	0	6	6	0	14	26	0.59	10.1695	10.1695	0	23.7288	44.0678	1.02531	0	0	0	0	0
1287	2	CHAI	-39.94	-73.58	6	1	0.21	9.2	0	6	6	0	14	26	0.59	10.1695	10.1695	0	23.7288	44.0678	1.0086	0	0	0	0	0
1288	2	CHAI	-39.94	-73.58	6	1	0.3	10.5	0	6	6	0	14	26	0.59	10.1695	10.1695	0	23.7288	44.0678	1.0607	0	0	0	0	0
1289	2	CHAI	-39.94	-73.58	6	1	0.22	9.3	0	6	6	0	14	26	0.59	10.1695	10.1695	0	23.7288	44.0678	1.01284	0	0	0	0	0
1290	2	CHAI	-39.94	-73.58	6	1	0.23	9.4	0	6	6	0	14	26	0.59	10.1695	10.1695	0	23.7288	44.0678	1.01703	0	0	0	0	0
1291	2	CHAI	-39.94	-73.58	6	1	0.25	9.3	0	6	6	0	14	26	0.59	10.1695	10.1695	0	23.7288	44.0678	1.01284	0	0	0	0	0
1292	2	CHAI	-39.94	-73.58	6	1	0.19	8.9	0	6	6	0	14	26	0.59	10.1695	10.1695	0	23.7288	44.0678	0.995635	0	0	0	0	0
1293	2	CHAI	-39.94	-73.58	6	1	0.19	9.2	0	6	6	0	14	26	0.59	10.1695	10.1695	0	23.7288	44.0678	1.0086	0	0	0	0	0
1294	2	CHAI	-39.94	-73.58	6	1	0.12	8.2	0	6	6	0	14	26	0.59	10.1695	10.1695	0	23.7288	44.0678	0.963788	0	0	0	0	0
1295	2	CHAI	-39.94	-73.58	6	1	0.17	9	0	6	6	0	14	26	0.59	10.1695	10.1695	0	23.7288	44.0678	1	0	0	0	0	0
1296	2	CHAI	-39.94	-73.58	6	1	0.18	8.7	0	6	6	0	14	26	0.59	10.1695	10.1695	0	23.7288	44.0678	0.986772	0	0	0	0	0
1297	2	CHAI	-39.94	-73.58	6	1	0.15	8.5	0	6	6	0	14	26	0.59	10.1695	10.1695	0	23.7288	44.0678	0.977724	0	0	0	0	0
1298	2	CHAI	-39.94	-73.58	6	1	0.16	8.7	0	6	6	0	14	26	0.59	10.1695	10.1695	0	23.7288	44.0678	0.986772	0	0	0	0	0
1299	3	CHAI	-39.94	-73.58	6	2	2	18.9	0	6	6	0	14	26	0.59	10.1695	10.1695	0	23.7288	44.0678	1.29885	0	0	0	0	0
1300	3	CHAI	-39.94	-73.58	6	1	1.21	15	2	6	6	0	14	26	0.59	10.1695	10.1695	0	23.7288	44.0678	1.20412	0.477121	0	0	0	0
1301	3	CHAI	-39.94	-73.58	6	2	0.89	13.3	2	6	6	0	14	26	0.59	10.1695	10.1695	0	23.7288	44.0678	1.15534	0.477121	0	0	0	0
1302	3	CHAI	-39.94	-73.58	6	1	0.87	13.8	1	6	6	0	14	26	0.59	10.1695	10.1695	0	23.7288	44.0678	1.17026	0.30103	0	0	0	0
1303	3	CHAI	-39.94	-73.58	6	1	0.22	9.6	0	6	6	0	14	26	0.59	10.1695	10.1695	0	23.7288	44.0678	1.02531	0	0	0	0	0
1304	3	CHAI	-39.94	-73.58	6	1	0.19	8.8	0	6	6	0	14	26	0.59	10.1695	10.1695	0	23.7288	44.0678	0.991226	0	0	0	0	0
1305	3	CHAI	-39.94	-73.58	6	1	0.16	8.2	0	6	6	0	14	26	0.59	10.1695	10.1695	0	23.7288	44.0678	0.963788	0	0	0	0	0
1306	4	CHAI	-39.94	-73.58	6	2	1.56	17.5	0	6	6	0	14	26	0.59	10.1695	10.1695	0	23.7288	44.0678	1.26717	0	0	0	0	0
1307	4	CHAI	-39.94	-73.58	6	1	0.54	11.7	0	6	6	0	14	26	0.59	10.1695	10.1695	0	23.7288	44.0678	1.1038	0	0	0	0	0
1308	4	CHAI	-39.94	-73.58	6	1	0.51	11.7	0	6	6	0	14	26	0.59	10.1695	10.1695	0	23.7288	44.0678	1.1038	0	0	0	0	0
1309	4	CHAI	-39.94	-73.58	6	1	0.2	9	0	6	6	0	14	26	0.59	10.1695	10.1695	0	23.7288	44.0678	1	0	0	0	0	0
1310	4	CHAI	-39.94	-73.58	6	1	0.21	9.4	0	6	6	0	14	26	0.59	10.1695	10.1695	0	23.7288	44.0678	1.01703	0	0	0	0	0
1311	1	CHEU	-39.4	-73.22	6	3	5.2	25.9	7	4	3	0	62	69	0.34	11.7647	8.82353	0	182.353	202.941	1.42975	0.90309	0	2	0	2
1312	1	CHEU	-39.4	-73.22	6	2	4.89	23	2	4	3	0	62	69	0.34	11.7647	8.82353	0	182.353	202.941	1.38021	0.477121	0	2	0	2
1313	1	CHEU	-39.4	-73.22	6	2	3.63	23.7	3	4	3	0	62	69	0.34	11.7647	8.82353	0	182.353	202.941	1.3927	0.60206	0	2	0	2
1314	1	CHEU	-39.4	-73.22	6	2	1.82	20.5	4	4	3	0	62	69	0.34	11.7647	8.82353	0	182.353	202.941	1.33244	0.69897	0	2	0	2
1315	1	CHEU	-39.4	-73.22	6	2	0.89	15.9	1	4	3	0	62	69	0.34	11.7647	8.82353	0	182.353	202.941	1.22789	0.30103	0	2	0	2
1316	1	CHEU	-39.4	-73.22	6	2	1.07	16	0	4	3	0	62	69	0.34	11.7647	8.82353	0	182.353	202.941	1.23045	0	0	2	0	2
1317	1	CHEU	-39.4	-73.22	6	2	0.92	15	0	4	3	0	62	69	0.34	11.7647	8.82353	0	182.353	202.941	1.20412	0	0	2	0	2
1318	1	CHEU	-39.4	-73.22	6	2	0.85	15.8	0	4	3	0	62	69	0.34	11.7647	8.82353	0	182.353	202.941	1.22531	0	0	2	0	2
1319	1	CHEU	-39.4	-73.22	6	1	0.75	13.6	2	4	3	0	62	69	0.34	11.7647	8.82353	0	182.353	202.941	1.16435	0.477121	0	2	0	2
1320	2	CHEU	-39.4	-73.22	6	2	5.76	26.3	3	4	3	0	62	69	0.34	11.7647	8.82353	0	182.353	202.941	1.43616	0.60206	0	2	0	2
1321	2	CHEU	-39.4	-73.22	6	2	6.34	26.9	6	4	3	0	62	69	0.34	11.7647	8.82353	0	182.353	202.941	1.4456	0.845098	0	2	0	2
1322	2	CHEU	-39.4	-73.22	6	2	4.65	25.5	2	4	3	0	62	69	0.34	11.7647	8.82353	0	182.353	202.941	1.42325	0.477121	0	2	0	2
1323	2	CHEU	-39.4	-73.22	6	2	5.57	27	4	4	3	0	62	69	0.34	11.7647	8.82353	0	182.353	202.941	1.44716	0.69897	0	2	0	2
1324	2	CHEU	-39.4	-73.22	6	2	1.98	18.9	0	4	3	0	62	69	0.34	11.7647	8.82353	0	182.353	202.941	1.29885	0	0	2	0	2
1325	2	CHEU	-39.4	-73.22	6	2	1.95	18.3	3	4	3	0	62	69	0.34	11.7647	8.82353	0	182.353	202.941	1.28556	0.60206	0	2	0	2
1326	2	CHEU	-39.4	-73.22	6	2	1.05	15.6	0	4	3	0	62	69	0.34	11.7647	8.82353	0	182.353	202.941	1.22011	0	0	2	0	2
1327	2	CHEU	-39.4	-73.22	6	2	0.97	15.1	1	4	3	0	62	69	0.34	11.7647	8.82353	0	182.353	202.941	1.20683	0.30103	0	2	0	2
1328	2	CHEU	-39.4	-73.22	6	2	0.68	14.6	0	4	3	0	62	69	0.34	11.7647	8.82353	0	182.353	202.941	1.19312	0	0	2	0	2
1329	2	CHEU	-39.4	-73.22	6	1	0.74	13.5	1	4	3	0	62	69	0.34	11.7647	8.82353	0	182.353	202.941	1.16137	0.30103	0	2	0	2
1330	2	CHEU	-39.4	-73.22	6	1	0.72	14	2	4	3	0	62	69	0.34	11.7647	8.82353	0	182.353	202.941	1.17609	0.477121	0	2	0	2
1331	2	CHEU	-39.4	-73.22	6	2	0.67	13.9	0	4	3	0	62	69	0.34	11.7647	8.82353	0	182.353	202.941	1.17319	0	0	2	0	2
1332	2	CHEU	-39.4	-73.22	6	1	0.67	12.6	3	4	3	0	62	69	0.34	11.7647	8.82353	0	182.353	202.941	1.13354	0.60206	0	2	0	2
1333	2	CHEU	-39.4	-73.22	6	1	0.35	13	0	4	3	0	62	69	0.34	11.7647	8.82353	0	182.353	202.941	1.14613	0	0	2	0	2
1334	3	CHEU	-39.4	-73.22	6	2	6.76	28.1	4	4	3	0	62	69	0.34	11.7647	8.82353	0	182.353	202.941	1.46389	0.69897	0	2	0	2
1335	3	CHEU	-39.4	-73.22	6	2	3.6	23.8	3	4	3	0	62	69	0.34	11.7647	8.82353	0	182.353	202.941	1.39445	0.60206	0	2	0	2
1336	3	CHEU	-39.4	-73.22	6	2	2.44	21.1	3	4	3	0	62	69	0.34	11.7647	8.82353	0	182.353	202.941	1.34439	0.60206	0	2	0	2
1337	3	CHEU	-39.4	-73.22	6	2	3.68	23.2	4	4	3	0	62	69	0.34	11.7647	8.82353	0	182.353	202.941	1.38382	0.69897	0	2	0	2
1338	3	CHEU	-39.4	-73.22	6	1	0.89	15.2	3	4	3	0	62	69	0.34	11.7647	8.82353	0	182.353	202.941	1.20952	0.60206	0	2	0	2
1339	3	CHEU	-39.4	-73.22	6	1	0.8	14.7	1	4	3	0	62	69	0.34	11.7647	8.82353	0	182.353	202.941	1.1959	0.30103	0	2	0	2
1340	3	CHEU	-39.4	-73.22	6	1	0.75	14	3	4	3	0	62	69	0.34	11.7647	8.82353	0	182.353	202.941	1.17609	0.60206	0	2	0	2
1341	3	CHEU	-39.4	-73.22	6	2	0.91	15.4	0	4	3	0	62	69	0.34	11.7647	8.82353	0	182.353	202.941	1.21484	0	0	2	0	2
1342	3	CHEU	-39.4	-73.22	6	1	0.81	14.6	0	4	3	0	62	69	0.34	11.7647	8.82353	0	182.353	202.941	1.19312	0	0	2	0	2
1343	3	CHEU	-39.4	-73.22	6	1	0.77	13.6	2	4	3	0	62	69	0.34	11.7647	8.82353	0	182.353	202.941	1.16435	0.477121	0	2	0	2
1344	3	CHEU	-39.4	-73.22	6	1	0.29	11	0	4	3	0	62	69	0.34	11.7647	8.82353	0	182.353	202.941	1.07918	0	0	2	0	2
1345	4	CHEU	-39.4	-73.22	6	1	0.83	14.2	1	4	3	0	62	69	0.34	11.7647	8.82353	0	182.353	202.941	1.18184	0.30103	0	2	0	2
1346	4	CHEU	-39.4	-73.22	6	2	2.63	23.1	11	4	3	0	62	69	0.34	11.7647	8.82353	0	182.353	202.941	1.38202	1.07918	0	2	0	2
1347	4	CHEU	-39.4	-73.22	6	2	0.93	25.9	0	4	3	0	62	69	0.34	11.7647	8.82353	0	182.353	202.941	1.42975	0	0	2	0	2
1348	4	CHEU	-39.4	-73.22	6	1	0.95	11.3	0	4	3	0	62	69	0.34	11.7647	8.82353	0	182.353	202.941	1.08991	0	0	2	0	2
1349	4	CHEU	-39.4	-73.22	6	1	0.81	14.6	3	4	3	0	62	69	0.34	11.7647	8.82353	0	182.353	202.941	1.19312	0.60206	0	2	0	2
1350	4	CHEU	-39.4	-73.22	6	2	3.09	22.5	2	4	3	0	62	69	0.34	11.7647	8.82353	0	182.353	202.941	1.37107	0.477121	0	2	0	2
1351	4	CHEU	-39.4	-73.22	6	2	1.65	18	1	4	3	0	62	69	0.34	11.7647	8.82353	0	182.353	202.941	1.27875	0.30103	0	2	0	2
1352	4	CHEU	-39.4	-73.22	6	1	0.24	10.7	0	4	3	0	62	69	0.34	11.7647	8.82353	0	182.353	202.941	1.06819	0	0	2	0	2
1353	4	CHEU	-39.4	-73.22	6	1	0.23	10.2	0	4	3	0	62	69	0.34	11.7647	8.82353	0	182.353	202.941	1.04922	0	0	2	0	2
1354	1	CURI	-39.73	-73.39	6	2	5.31	25.4	4	5	101	0	6	112	0.92	5.43478	109.783	0	6.52174	121.739	1.4216	0.69897	0	0	0	0
1355	1	CURI	-39.73	-73.39	6	2	4.27	23.3	7	5	101	0	6	112	0.92	5.43478	109.783	0	6.52174	121.739	1.38561	0.90309	0	0	0	0
1356	1	CURI	-39.73	-73.39	6	2	2.43	19.6	0	5	101	0	6	112	0.92	5.43478	109.783	0	6.52174	121.739	1.31387	0	0	0	0	0
1357	1	CURI	-39.73	-73.39	6	2	1.9	17.5	0	5	101	0	6	112	0.92	5.43478	109.783	0	6.52174	121.739	1.26717	0	0	0	0	0
1358	1	CURI	-39.73	-73.39	6	2	1.56	16.8	2	5	101	0	6	112	0.92	5.43478	109.783	0	6.52174	121.739	1.25042	0.477121	0	0	0	0
1359	1	CURI	-39.73	-73.39	6	2	0.82	13.6	4	5	101	0	6	112	0.92	5.43478	109.783	0	6.52174	121.739	1.16435	0.69897	0	0	0	0
1360	1	CURI	-39.73	-73.39	6	1	0.66	12.2	1	5	101	0	6	112	0.92	5.43478	109.783	0	6.52174	121.739	1.12057	0.30103	0	0	0	0
1361	1	CURI	-39.73	-73.39	6	1	0.92	13.6	1	5	101	0	6	112	0.92	5.43478	109.783	0	6.52174	121.739	1.16435	0.30103	0	0	0	0
1362	1	CURI	-39.73	-73.39	6	1	0.61	12.4	3	5	101	0	6	112	0.92	5.43478	109.783	0	6.52174	121.739	1.1271	0.60206	0	0	0	0
1363	1	CURI	-39.73	-73.39	6	1	0.66	12.7	2	5	101	0	6	112	0.92	5.43478	109.783	0	6.52174	121.739	1.13672	0.477121	0	0	0	0
1364	1	CURI	-39.73	-73.39	6	1	1.04	12.9	1	5	101	0	6	112	0.92	5.43478	109.783	0	6.52174	121.739	1.14301	0.30103	0	0	0	0
1365	1	CURI	-39.73	-73.39	6	1	0.91	13.6	0	5	101	0	6	112	0.92	5.43478	109.783	0	6.52174	121.739	1.16435	0	0	0	0	0
1366	1	CURI	-39.73	-73.39	6	1	0.7	12	0	5	101	0	6	112	0.92	5.43478	109.783	0	6.52174	121.739	1.11394	0	0	0	0	0
1367	1	CURI	-39.73	-73.39	6	1	0.54	11.6	1	5	101	0	6	112	0.92	5.43478	109.783	0	6.52174	121.739	1.10037	0.30103	0	0	0	0
1368	1	CURI	-39.73	-73.39	6	1	0.51	11	3	5	101	0	6	112	0.92	5.43478	109.783	0	6.52174	121.739	1.07918	0.60206	0	0	0	0
1369	1	CURI	-39.73	-73.39	6	1	0.47	11.3	0	5	101	0	6	112	0.92	5.43478	109.783	0	6.52174	121.739	1.08991	0	0	0	0	0
1370	1	CURI	-39.73	-73.39	6	1	0.73	12.4	4	5	101	0	6	112	0.92	5.43478	109.783	0	6.52174	121.739	1.1271	0.69897	0	0	0	0
1371	1	CURI	-39.73	-73.39	6	1	0.54	12.3	0	5	101	0	6	112	0.92	5.43478	109.783	0	6.52174	121.739	1.12385	0	0	0	0	0
1372	1	CURI	-39.73	-73.39	6	1	0.47	11.1	0	5	101	0	6	112	0.92	5.43478	109.783	0	6.52174	121.739	1.08279	0	0	0	0	0
1373	1	CURI	-39.73	-73.39	6	1	0.52	11.8	1	5	101	0	6	112	0.92	5.43478	109.783	0	6.52174	121.739	1.10721	0.30103	0	0	0	0
1374	1	CURI	-39.73	-73.39	6	1	0.43	10.9	0	5	101	0	6	112	0.92	5.43478	109.783	0	6.52174	121.739	1.07555	0	0	0	0	0
1375	1	CURI	-39.73	-73.39	6	1	0.34	10.3	0	5	101	0	6	112	0.92	5.43478	109.783	0	6.52174	121.739	1.05308	0	0	0	0	0
1376	1	CURI	-39.73	-73.39	6	1	0.21	9.1	0	5	101	0	6	112	0.92	5.43478	109.783	0	6.52174	121.739	1.00432	0	0	0	0	0
1377	1	CURI	-39.73	-73.39	6	1	0.24	8.9	0	5	101	0	6	112	0.92	5.43478	109.783	0	6.52174	121.739	0.995635	0	0	0	0	0
1378	1	CURI	-39.73	-73.39	6	1	0.14	8.1	0	5	101	0	6	112	0.92	5.43478	109.783	0	6.52174	121.739	0.959041	0	0	0	0	0
1379	2	CURI	-39.73	-73.39	6	3	5.72	25.3	3	5	101	0	6	112	0.92	5.43478	109.783	0	6.52174	121.739	1.41996	0.60206	0	0	0	0
1380	2	CURI	-39.73	-73.39	6	2	5.76	25.3	3	5	101	0	6	112	0.92	5.43478	109.783	0	6.52174	121.739	1.41996	0.60206	0	0	0	0
1381	2	CURI	-39.73	-73.39	6	3	7.52	27.4	11	5	101	0	6	112	0.92	5.43478	109.783	0	6.52174	121.739	1.45332	1.07918	0	0	0	0
1382	2	CURI	-39.73	-73.39	6	3	4.18	23.5	7	5	101	0	6	112	0.92	5.43478	109.783	0	6.52174	121.739	1.38917	0.90309	0	0	0	0
1383	2	CURI	-39.73	-73.39	6	3	4.46	23.6	3	5	101	0	6	112	0.92	5.43478	109.783	0	6.52174	121.739	1.39094	0.60206	0	0	0	0
1384	2	CURI	-39.73	-73.39	6	3	4.85	24.4	7	5	101	0	6	112	0.92	5.43478	109.783	0	6.52174	121.739	1.40483	0.90309	0	0	0	0
1385	2	CURI	-39.73	-73.39	6	3	3.11	23.1	2	5	101	0	6	112	0.92	5.43478	109.783	0	6.52174	121.739	1.38202	0.477121	0	0	0	0
1386	2	CURI	-39.73	-73.39	6	2	3.29	22.8	3	5	101	0	6	112	0.92	5.43478	109.783	0	6.52174	121.739	1.37658	0.60206	0	0	0	0
1387	2	CURI	-39.73	-73.39	6	2	3.51	22.4	1	5	101	0	6	112	0.92	5.43478	109.783	0	6.52174	121.739	1.36922	0.30103	0	0	0	0
1388	2	CURI	-39.73	-73.39	6	2	3.58	22.5	4	5	101	0	6	112	0.92	5.43478	109.783	0	6.52174	121.739	1.37107	0.69897	0	0	0	0
1389	2	CURI	-39.73	-73.39	6	2	0.38	23.3	4	5	101	0	6	112	0.92	5.43478	109.783	0	6.52174	121.739	1.38561	0.69897	0	0	0	0
1390	2	CURI	-39.73	-73.39	6	2	2.69	20.7	2	5	101	0	6	112	0.92	5.43478	109.783	0	6.52174	121.739	1.33646	0.477121	0	0	0	0
1391	2	CURI	-39.73	-73.39	6	2	2.18	18	4	5	101	0	6	112	0.92	5.43478	109.783	0	6.52174	121.739	1.27875	0.69897	0	0	0	0
1392	2	CURI	-39.73	-73.39	6	2	1.91	18	2	5	101	0	6	112	0.92	5.43478	109.783	0	6.52174	121.739	1.27875	0.477121	0	0	0	0
1393	2	CURI	-39.73	-73.39	6	1	1.12	14.8	1	5	101	0	6	112	0.92	5.43478	109.783	0	6.52174	121.739	1.19866	0.30103	0	0	0	0
1394	2	CURI	-39.73	-73.39	6	1	0.77	14	0	5	101	0	6	112	0.92	5.43478	109.783	0	6.52174	121.739	1.17609	0	0	0	0	0
1395	2	CURI	-39.73	-73.39	6	2	0.76	13.9	0	5	101	0	6	112	0.92	5.43478	109.783	0	6.52174	121.739	1.17319	0	0	0	0	0
1396	2	CURI	-39.73	-73.39	6	2	0.7	12.7	1	5	101	0	6	112	0.92	5.43478	109.783	0	6.52174	121.739	1.13672	0.30103	0	0	0	0
1397	2	CURI	-39.73	-73.39	6	2	0.74	13.8	2	5	101	0	6	112	0.92	5.43478	109.783	0	6.52174	121.739	1.17026	0.477121	0	0	0	0
1398	2	CURI	-39.73	-73.39	6	1	0.66	13	2	5	101	0	6	112	0.92	5.43478	109.783	0	6.52174	121.739	1.14613	0.477121	0	0	0	0
1399	2	CURI	-39.73	-73.39	6	1	0.63	11.6	0	5	101	0	6	112	0.92	5.43478	109.783	0	6.52174	121.739	1.10037	0	0	0	0	0
1400	2	CURI	-39.73	-73.39	6	1	0.72	13.2	0	5	101	0	6	112	0.92	5.43478	109.783	0	6.52174	121.739	1.15229	0	0	0	0	0
1401	2	CURI	-39.73	-73.39	6	1	0.46	11.6	2	5	101	0	6	112	0.92	5.43478	109.783	0	6.52174	121.739	1.10037	0.477121	0	0	0	0
1402	2	CURI	-39.73	-73.39	6	1	0.4	11.3	1	5	101	0	6	112	0.92	5.43478	109.783	0	6.52174	121.739	1.08991	0.30103	0	0	0	0
1403	2	CURI	-39.73	-73.39	6	1	0.83	14.3	2	5	101	0	6	112	0.92	5.43478	109.783	0	6.52174	121.739	1.18469	0.477121	0	0	0	0
1404	2	CURI	-39.73	-73.39	6	1	0.51	11.5	0	5	101	0	6	112	0.92	5.43478	109.783	0	6.52174	121.739	1.09691	0	0	0	0	0
1405	2	CURI	-39.73	-73.39	6	1	0.43	11.1	3	5	101	0	6	112	0.92	5.43478	109.783	0	6.52174	121.739	1.08279	0.60206	0	0	0	0
1406	2	CURI	-39.73	-73.39	6	1	0.41	10.9	1	5	101	0	6	112	0.92	5.43478	109.783	0	6.52174	121.739	1.07555	0.30103	0	0	0	0
1407	2	CURI	-39.73	-73.39	6	1	0.31	10	0	5	101	0	6	112	0.92	5.43478	109.783	0	6.52174	121.739	1.04139	0	0	0	0	0
1408	2	CURI	-39.73	-73.39	6	1	0.28	9.7	0	5	101	0	6	112	0.92	5.43478	109.783	0	6.52174	121.739	1.02938	0	0	0	0	0
1409	2	CURI	-39.73	-73.39	6	2	0.32	10.5	0	5	101	0	6	112	0.92	5.43478	109.783	0	6.52174	121.739	1.0607	0	0	0	0	0
1410	2	CURI	-39.73	-73.39	6	1	0.25	9.4	0	5	101	0	6	112	0.92	5.43478	109.783	0	6.52174	121.739	1.01703	0	0	0	0	0
1411	3	CURI	-39.73	-73.39	6	1	4.17	24.6	6	5	101	0	6	112	0.92	5.43478	109.783	0	6.52174	121.739	1.40824	0.845098	0	0	0	0
1412	3	CURI	-39.73	-73.39	6	1	3.55	22.4	2	5	101	0	6	112	0.92	5.43478	109.783	0	6.52174	121.739	1.36922	0.477121	0	0	0	0
1413	3	CURI	-39.73	-73.39	6	1	5.34	20.2	1	5	101	0	6	112	0.92	5.43478	109.783	0	6.52174	121.739	1.32634	0.30103	0	0	0	0
1414	3	CURI	-39.73	-73.39	6	1	4.92	25.6	1	5	101	0	6	112	0.92	5.43478	109.783	0	6.52174	121.739	1.42488	0.30103	0	0	0	0
1415	3	CURI	-39.73	-73.39	6	1	4.31	24.4	2	5	101	0	6	112	0.92	5.43478	109.783	0	6.52174	121.739	1.40483	0.477121	0	0	0	0
1416	3	CURI	-39.73	-73.39	6	1	2.28	19.8	1	5	101	0	6	112	0.92	5.43478	109.783	0	6.52174	121.739	1.31806	0.30103	0	0	0	0
1417	3	CURI	-39.73	-73.39	6	1	3.99	23.3	1	5	101	0	6	112	0.92	5.43478	109.783	0	6.52174	121.739	1.38561	0.30103	0	0	0	0
1418	3	CURI	-39.73	-73.39	6	1	2.31	17	3	5	101	0	6	112	0.92	5.43478	109.783	0	6.52174	121.739	1.25527	0.60206	0	0	0	0
1419	3	CURI	-39.73	-73.39	6	1	2.45	18.5	2	5	101	0	6	112	0.92	5.43478	109.783	0	6.52174	121.739	1.29003	0.477121	0	0	0	0
1420	3	CURI	-39.73	-73.39	6	1	3.88	21.9	1	5	101	0	6	112	0.92	5.43478	109.783	0	6.52174	121.739	1.35984	0.30103	0	0	0	0
1421	3	CURI	-39.73	-73.39	6	1	4.89	23.5	5	5	101	0	6	112	0.92	5.43478	109.783	0	6.52174	121.739	1.38917	0.778151	0	0	0	0
1422	3	CURI	-39.73	-73.39	6	1	4.32	21.3	1	5	101	0	6	112	0.92	5.43478	109.783	0	6.52174	121.739	1.3483	0.30103	0	0	0	0
1423	3	CURI	-39.73	-73.39	6	1	2.24	16.9	2	5	101	0	6	112	0.92	5.43478	109.783	0	6.52174	121.739	1.25285	0.477121	0	0	0	0
1424	3	CURI	-39.73	-73.39	6	1	2.52	18	0	5	101	0	6	112	0.92	5.43478	109.783	0	6.52174	121.739	1.27875	0	0	0	0	0
1425	3	CURI	-39.73	-73.39	6	1	2.33	17.4	0	5	101	0	6	112	0.92	5.43478	109.783	0	6.52174	121.739	1.26482	0	0	0	0	0
1426	3	CURI	-39.73	-73.39	6	1	2.13	15.3	3	5	101	0	6	112	0.92	5.43478	109.783	0	6.52174	121.739	1.21219	0.60206	0	0	0	0
1427	3	CURI	-39.73	-73.39	6	1	0.96	11.4	1	5	101	0	6	112	0.92	5.43478	109.783	0	6.52174	121.739	1.09342	0.30103	0	0	0	0
1428	3	CURI	-39.73	-73.39	6	1	0.86	11.8	1	5	101	0	6	112	0.92	5.43478	109.783	0	6.52174	121.739	1.10721	0.30103	0	0	0	0
1429	3	CURI	-39.73	-73.39	6	1	0.9	12	2	5	101	0	6	112	0.92	5.43478	109.783	0	6.52174	121.739	1.11394	0.477121	0	0	0	0
1430	3	CURI	-39.73	-73.39	6	1	0.84	12.9	2	5	101	0	6	112	0.92	5.43478	109.783	0	6.52174	121.739	1.14301	0.477121	0	0	0	0
1431	3	CURI	-39.73	-73.39	6	1	0.76	11	0	5	101	0	6	112	0.92	5.43478	109.783	0	6.52174	121.739	1.07918	0	0	0	0	0
1432	3	CURI	-39.73	-73.39	6	1	0.77	12	1	5	101	0	6	112	0.92	5.43478	109.783	0	6.52174	121.739	1.11394	0.30103	0	0	0	0
1433	3	CURI	-39.73	-73.39	6	1	0.7	11	4	5	101	0	6	112	0.92	5.43478	109.783	0	6.52174	121.739	1.07918	0.69897	0	0	0	0
1434	3	CURI	-39.73	-73.39	6	1	0.61	10	0	5	101	0	6	112	0.92	5.43478	109.783	0	6.52174	121.739	1.04139	0	0	0	0	0
1435	3	CURI	-39.73	-73.39	6	2	0.68	10.9	0	5	101	0	6	112	0.92	5.43478	109.783	0	6.52174	121.739	1.07555	0	0	0	0	0
1436	3	CURI	-39.73	-73.39	6	1	0.65	10.7	3	5	101	0	6	112	0.92	5.43478	109.783	0	6.52174	121.739	1.06819	0.60206	0	0	0	0
1437	3	CURI	-39.73	-73.39	6	1	0.52	10	1	5	101	0	6	112	0.92	5.43478	109.783	0	6.52174	121.739	1.04139	0.30103	0	0	0	0
1438	3	CURI	-39.73	-73.39	6	1	0.59	11	0	5	101	0	6	112	0.92	5.43478	109.783	0	6.52174	121.739	1.07918	0	0	0	0	0
1439	3	CURI	-39.73	-73.39	6	1	0.49	9.9	0	5	101	0	6	112	0.92	5.43478	109.783	0	6.52174	121.739	1.03743	0	0	0	0	0
1440	3	CURI	-39.73	-73.39	6	2	0.42	9	0	5	101	0	6	112	0.92	5.43478	109.783	0	6.52174	121.739	1	0	0	0	0	0
1441	3	CURI	-39.73	-73.39	6	1	0.24	7	0	5	101	0	6	112	0.92	5.43478	109.783	0	6.52174	121.739	0.90309	0	0	0	0	0
1442	3	CURI	-39.73	-73.39	6	1	0.25	8.9	0	5	101	0	6	112	0.92	5.43478	109.783	0	6.52174	121.739	0.995635	0	0	0	0	0
1443	4	CURI	-39.73	-73.39	6	1	0.58	10	0	5	101	0	6	112	0.92	5.43478	109.783	0	6.52174	121.739	1.04139	0	0	0	0	0
1444	4	CURI	-39.73	-73.39	6	1	3.61	22	7	5	101	0	6	112	0.92	5.43478	109.783	0	6.52174	121.739	1.36173	0.90309	0	0	0	0
1445	4	CURI	-39.73	-73.39	6	1	4.98	26.2	10	5	101	0	6	112	0.92	5.43478	109.783	0	6.52174	121.739	1.43457	1.04139	0	0	0	0
1446	4	CURI	-39.73	-73.39	6	1	6.78	28.1	2	5	101	0	6	112	0.92	5.43478	109.783	0	6.52174	121.739	1.46389	0.477121	0	0	0	0
1447	4	CURI	-39.73	-73.39	6	1	4.18	24	6	5	101	0	6	112	0.92	5.43478	109.783	0	6.52174	121.739	1.39794	0.845098	0	0	0	0
1448	4	CURI	-39.73	-73.39	6	1	5.92	26	1	5	101	0	6	112	0.92	5.43478	109.783	0	6.52174	121.739	1.43136	0.30103	0	0	0	0
1449	4	CURI	-39.73	-73.39	6	1	3.95	22.7	2	5	101	0	6	112	0.92	5.43478	109.783	0	6.52174	121.739	1.37475	0.477121	0	0	0	0
1450	4	CURI	-39.73	-73.39	6	1	4.27	23.1	2	5	101	0	6	112	0.92	5.43478	109.783	0	6.52174	121.739	1.38202	0.477121	0	0	0	0
1451	4	CURI	-39.73	-73.39	6	1	4.38	24.4	1	5	101	0	6	112	0.92	5.43478	109.783	0	6.52174	121.739	1.40483	0.30103	0	0	0	0
1452	4	CURI	-39.73	-73.39	6	1	2.29	20	2	5	101	0	6	112	0.92	5.43478	109.783	0	6.52174	121.739	1.32222	0.477121	0	0	0	0
1453	4	CURI	-39.73	-73.39	6	1	3.64	22	3	5	101	0	6	112	0.92	5.43478	109.783	0	6.52174	121.739	1.36173	0.60206	0	0	0	0
1454	4	CURI	-39.73	-73.39	6	1	2.82	20.6	0	5	101	0	6	112	0.92	5.43478	109.783	0	6.52174	121.739	1.33445	0	0	0	0	0
1455	4	CURI	-39.73	-73.39	6	1	3.39	22	0	5	101	0	6	112	0.92	5.43478	109.783	0	6.52174	121.739	1.36173	0	0	0	0	0
1456	4	CURI	-39.73	-73.39	6	1	1.96	18.7	0	5	101	0	6	112	0.92	5.43478	109.783	0	6.52174	121.739	1.29447	0	0	0	0	0
1457	4	CURI	-39.73	-73.39	6	1	1.18	15	1	5	101	0	6	112	0.92	5.43478	109.783	0	6.52174	121.739	1.20412	0.30103	0	0	0	0
1458	4	CURI	-39.73	-73.39	6	1	1.43	16.8	3	5	101	0	6	112	0.92	5.43478	109.783	0	6.52174	121.739	1.25042	0.60206	0	0	0	0
1459	4	CURI	-39.73	-73.39	6	1	0.8	13	1	5	101	0	6	112	0.92	5.43478	109.783	0	6.52174	121.739	1.14613	0.30103	0	0	0	0
1460	4	CURI	-39.73	-73.39	6	1	0.95	13.8	3	5	101	0	6	112	0.92	5.43478	109.783	0	6.52174	121.739	1.17026	0.60206	0	0	0	0
1461	4	CURI	-39.73	-73.39	6	1	1.03	15.3	2	5	101	0	6	112	0.92	5.43478	109.783	0	6.52174	121.739	1.21219	0.477121	0	0	0	0
1462	4	CURI	-39.73	-73.39	6	1	0.92	15	0	5	101	0	6	112	0.92	5.43478	109.783	0	6.52174	121.739	1.20412	0	0	0	0	0
1463	4	CURI	-39.73	-73.39	6	1	0.88	12.9	1	5	101	0	6	112	0.92	5.43478	109.783	0	6.52174	121.739	1.14301	0.30103	0	0	0	0
1464	4	CURI	-39.73	-73.39	6	1	1.04	14.9	0	5	101	0	6	112	0.92	5.43478	109.783	0	6.52174	121.739	1.2014	0	0	0	0	0
1465	4	CURI	-39.73	-73.39	6	1	0.84	13.4	0	5	101	0	6	112	0.92	5.43478	109.783	0	6.52174	121.739	1.15836	0	0	0	0	0
1466	4	CURI	-39.73	-73.39	6	1	0.93	13.9	1	5	101	0	6	112	0.92	5.43478	109.783	0	6.52174	121.739	1.17319	0.30103	0	0	0	0
1467	4	CURI	-39.73	-73.39	6	1	0.84	13.6	3	5	101	0	6	112	0.92	5.43478	109.783	0	6.52174	121.739	1.16435	0.60206	0	0	0	0
1468	4	CURI	-39.73	-73.39	6	1	0.68	14	3	5	101	0	6	112	0.92	5.43478	109.783	0	6.52174	121.739	1.17609	0.60206	0	0	0	0
1469	4	CURI	-39.73	-73.39	6	1	0.67	12.2	4	5	101	0	6	112	0.92	5.43478	109.783	0	6.52174	121.739	1.12057	0.69897	0	0	0	0
1470	4	CURI	-39.73	-73.39	6	1	0.89	14	1	5	101	0	6	112	0.92	5.43478	109.783	0	6.52174	121.739	1.17609	0.30103	0	0	0	0
1471	4	CURI	-39.73	-73.39	6	1	0.58	12	1	5	101	0	6	112	0.92	5.43478	109.783	0	6.52174	121.739	1.11394	0.30103	0	0	0	0
1472	4	CURI	-39.73	-73.39	6	1	0.82	13.6	0	5	101	0	6	112	0.92	5.43478	109.783	0	6.52174	121.739	1.16435	0	0	0	0	0
1473	4	CURI	-39.73	-73.39	6	1	0.49	12	4	5	101	0	6	112	0.92	5.43478	109.783	0	6.52174	121.739	1.11394	0.69897	0	0	0	0
1474	4	CURI	-39.73	-73.39	6	1	0.71	12.9	4	5	101	0	6	112	0.92	5.43478	109.783	0	6.52174	121.739	1.14301	0.69897	0	0	0	0
1475	4	CURI	-39.73	-73.39	6	1	0.58	12	2	5	101	0	6	112	0.92	5.43478	109.783	0	6.52174	121.739	1.11394	0.477121	0	0	0	0
1476	4	CURI	-39.73	-73.39	6	1	0.81	13	0	5	101	0	6	112	0.92	5.43478	109.783	0	6.52174	121.739	1.14613	0	0	0	0	0
1477	4	CURI	-39.73	-73.39	6	1	0.29	9.6	0	5	101	0	6	112	0.92	5.43478	109.783	0	6.52174	121.739	1.02531	0	0	0	0	0
1478	4	CURI	-39.73	-73.39	6	1	0.63	13.1	0	5	101	0	6	112	0.92	5.43478	109.783	0	6.52174	121.739	1.14922	0	0	0	0	0
1479	4	CURI	-39.73	-73.39	6	1	0.46	10.9	0	5	101	0	6	112	0.92	5.43478	109.783	0	6.52174	121.739	1.07555	0	0	0	0	0
1480	4	CURI	-39.73	-73.39	6	1	0.43	11.8	0	5	101	0	6	112	0.92	5.43478	109.783	0	6.52174	121.739	1.10721	0	0	0	0	0
1481	4	CURI	-39.73	-73.39	6	1	0.5	11.2	0	5	101	0	6	112	0.92	5.43478	109.783	0	6.52174	121.739	1.08636	0	0	0	0	0
1482	4	CURI	-39.73	-73.39	6	1	0.28	9.2	0	5	101	0	6	112	0.92	5.43478	109.783	0	6.52174	121.739	1.0086	0	0	0	0	0
1483	4	CURI	-39.73	-73.39	6	2	0.27	10	0	5	101	0	6	112	0.92	5.43478	109.783	0	6.52174	121.739	1.04139	0	0	0	0	0
1484	4	CURI	-39.73	-73.39	6	1	0.31	10.5	0	5	101	0	6	112	0.92	5.43478	109.783	0	6.52174	121.739	1.0607	0	0	0	0	0
1485	4	CURI	-39.73	-73.39	6	1	0.2	8.3	0	5	101	0	6	112	0.92	5.43478	109.783	0	6.52174	121.739	0.968483	0	0	0	0	0
1486	1	CALF	-39.79	-73.39	7	3	6.917	29	8	16	27	0	3	46	0.8	20	33.75	0	3.75	57.5	1.47712	0.954243	0	0	0	0
1487	1	CALF	-39.79	-73.39	7	3	5.303	27.4	3	16	27	0	3	46	0.8	20	33.75	0	3.75	57.5	1.45332	0.60206	0	0	0	0
1488	1	CALF	-39.79	-73.39	7	3	4.668	25	2	16	27	0	3	46	0.8	20	33.75	0	3.75	57.5	1.41497	0.477121	0	0	0	0
1489	1	CALF	-39.79	-73.39	7	3	4.411	25.9	3	16	27	0	3	46	0.8	20	33.75	0	3.75	57.5	1.42975	0.60206	0	0	0	0
1490	1	CALF	-39.79	-73.39	7	3	4.532	25.4	0	16	27	0	3	46	0.8	20	33.75	0	3.75	57.5	1.4216	0	0	0	0	0
1491	1	CALF	-39.79	-73.39	7	1	0.804	13.6	4	16	27	0	3	46	0.8	20	33.75	0	3.75	57.5	1.16435	0.69897	0	0	0	0
1492	2	CALF	-39.79	-73.39	7	3	5.78	27.8	2	16	27	0	3	46	0.8	20	33.75	0	3.75	57.5	1.45939	0.477121	0	0	0	0
1493	2	CALF	-39.79	-73.39	7	3	4.249	25.1	0	16	27	0	3	46	0.8	20	33.75	0	3.75	57.5	1.41664	0	0	0	0	0
1494	2	CALF	-39.79	-73.39	7	3	4.857	24.9	2	16	27	0	3	46	0.8	20	33.75	0	3.75	57.5	1.4133	0.477121	0	0	0	0
1495	2	CALF	-39.79	-73.39	7	3	4.803	24.3	3	16	27	0	3	46	0.8	20	33.75	0	3.75	57.5	1.40312	0.60206	0	0	0	0
1496	2	CALF	-39.79	-73.39	7	3	2.261	21.1	2	16	27	0	3	46	0.8	20	33.75	0	3.75	57.5	1.34439	0.477121	0	0	0	0
1497	2	CALF	-39.79	-73.39	7	1	0.279	10.7	0	16	27	0	3	46	0.8	20	33.75	0	3.75	57.5	1.06819	0	0	0	0	0
1498	2	CALF	-39.79	-73.39	7	1	0.225	9.07	0	16	27	0	3	46	0.8	20	33.75	0	3.75	57.5	1.00303	0	0	0	0	0
1499	3	CALF	-39.79	-73.39	7	3	3.979	24.3	3	16	27	0	3	46	0.8	20	33.75	0	3.75	57.5	1.40312	0.60206	0	0	0	0
1500	3	CALF	-39.79	-73.39	7	3	1.71	18.9	1	16	27	0	3	46	0.8	20	33.75	0	3.75	57.5	1.29885	0.30103	0	0	0	0
1501	3	CALF	-39.79	-73.39	7	3	1.877	19.9	3	16	27	0	3	46	0.8	20	33.75	0	3.75	57.5	1.32015	0.60206	0	0	0	0
1502	3	CALF	-39.79	-73.39	7	1	0.976	14	1	16	27	0	3	46	0.8	20	33.75	0	3.75	57.5	1.17609	0.30103	0	0	0	0
1503	3	CALF	-39.79	-73.39	7	1	0.309	10.3	0	16	27	0	3	46	0.8	20	33.75	0	3.75	57.5	1.05308	0	0	0	0	0
1504	3	CALF	-39.79	-73.39	7	1	0.215	10	0	16	27	0	3	46	0.8	20	33.75	0	3.75	57.5	1.04139	0	0	0	0	0
1505	4	CALF	-39.79	-73.39	7	3	5.82	27.2	5	16	27	0	3	46	0.8	20	33.75	0	3.75	57.5	1.45025	0.778151	0	0	0	0
1506	4	CALF	-39.79	-73.39	7	3	5.668	26.4	3	16	27	0	3	46	0.8	20	33.75	0	3.75	57.5	1.43775	0.60206	0	0	0	0
1507	4	CALF	-39.79	-73.39	7	3	4.027	24.8	4	16	27	0	3	46	0.8	20	33.75	0	3.75	57.5	1.41162	0.69897	0	0	0	0
1508	4	CALF	-39.79	-73.39	7	3	4.901	24.9	3	16	27	0	3	46	0.8	20	33.75	0	3.75	57.5	1.4133	0.60206	0	0	0	0
1509	4	CALF	-39.79	-73.39	7	3	4.42	25	4	16	27	0	3	46	0.8	20	33.75	0	3.75	57.5	1.41497	0.69897	0	0	0	0
1510	4	CALF	-39.79	-73.39	7	2	4.035	24.6	1	16	27	0	3	46	0.8	20	33.75	0	3.75	57.5	1.40824	0.30103	0	0	0	0
1511	4	CALF	-39.79	-73.39	7	2	0.928	15.1	0	16	27	0	3	46	0.8	20	33.75	0	3.75	57.5	1.20683	0	0	0	0	0
1512	4	CALF	-39.79	-73.39	7	2	0.722	14.6	1	16	27	0	3	46	0.8	20	33.75	0	3.75	57.5	1.19312	0.30103	0	0	0	0
1513	4	CALF	-39.79	-73.39	7	1	0.246	10	0	16	27	0	3	46	0.8	20	33.75	0	3.75	57.5	1.04139	0	0	0	0	0
1514	4	CALF	-39.79	-73.39	7	1	0.225	10.1	0	16	27	0	3	46	0.8	20	33.75	0	3.75	57.5	1.04532	0	0	0	0	0
1515	4	CALF	-39.79	-73.39	7	1	0.269	10	0	16	27	0	3	46	0.8	20	33.75	0	3.75	57.5	1.04139	0	0	0	0	0
1516	1	CHAI	-39.94	-73.58	7	3	3.769	25.1	2	3	5	0	3	11	0.59	5.08475	8.47458	0	5.08475	18.6441	1.41664	0.477121	3	0	0	3
1517	1	CHAI	-39.94	-73.58	7	3	3.755	25	5	3	5	0	3	11	0.59	5.08475	8.47458	0	5.08475	18.6441	1.41497	0.778151	3	0	0	3
1518	1	CHAI	-39.94	-73.58	7	3	3.277	23.1	6	3	5	0	3	11	0.59	5.08475	8.47458	0	5.08475	18.6441	1.38202	0.845098	3	0	0	3
1519	1	CHAI	-39.94	-73.58	7	3	2.996	23.8	2	3	5	0	3	11	0.59	5.08475	8.47458	0	5.08475	18.6441	1.39445	0.477121	3	0	0	3
1520	1	CHAI	-39.94	-73.58	7	3	3.19	23.9	3	3	5	0	3	11	0.59	5.08475	8.47458	0	5.08475	18.6441	1.3962	0.60206	3	0	0	3
1521	1	CHAI	-39.94	-73.58	7	3	2.632	22.9	1	3	5	0	3	11	0.59	5.08475	8.47458	0	5.08475	18.6441	1.3784	0.30103	3	0	0	3
1522	1	CHAI	-39.94	-73.58	7	3	2.842	21.9	2	3	5	0	3	11	0.59	5.08475	8.47458	0	5.08475	18.6441	1.35984	0.477121	3	0	0	3
1523	1	CHAI	-39.94	-73.58	7	3	1.369	19.3	0	3	5	0	3	11	0.59	5.08475	8.47458	0	5.08475	18.6441	1.3075	0	3	0	0	3
1524	1	CHAI	-39.94	-73.58	7	3	1.574	19.2	0	3	5	0	3	11	0.59	5.08475	8.47458	0	5.08475	18.6441	1.30535	0	3	0	0	3
1525	1	CHAI	-39.94	-73.58	7	3	1.108	18.1	1	3	5	0	3	11	0.59	5.08475	8.47458	0	5.08475	18.6441	1.28103	0.30103	3	0	0	3
1526	1	CHAI	-39.94	-73.58	7	3	0.675	19.6	2	3	5	0	3	11	0.59	5.08475	8.47458	0	5.08475	18.6441	1.31387	0.477121	3	0	0	3
1527	1	CHAI	-39.94	-73.58	7	1	0.534	13	0	3	5	0	3	11	0.59	5.08475	8.47458	0	5.08475	18.6441	1.14613	0	3	0	0	3
1528	1	CHAI	-39.94	-73.58	7	1	0.333	12	0	3	5	0	3	11	0.59	5.08475	8.47458	0	5.08475	18.6441	1.11394	0	3	0	0	3
1529	1	CHAI	-39.94	-73.58	7	2	0.316	11.9	0	3	5	0	3	11	0.59	5.08475	8.47458	0	5.08475	18.6441	1.11059	0	3	0	0	3
1530	1	CHAI	-39.94	-73.58	7	1	0.216	10.4	0	3	5	0	3	11	0.59	5.08475	8.47458	0	5.08475	18.6441	1.0569	0	3	0	0	3
1531	1	CHAI	-39.94	-73.58	7	1	0.244	11.6	0	3	5	0	3	11	0.59	5.08475	8.47458	0	5.08475	18.6441	1.10037	0	3	0	0	3
1532	1	CHAI	-39.94	-73.58	7	2	0.222	10.3	0	3	5	0	3	11	0.59	5.08475	8.47458	0	5.08475	18.6441	1.05308	0	3	0	0	3
1533	1	CHAI	-39.94	-73.58	7	1	0.187	9.7	0	3	5	0	3	11	0.59	5.08475	8.47458	0	5.08475	18.6441	1.02938	0	3	0	0	3
1534	1	CHAI	-39.94	-73.58	7	1	0.172	10.2	0	3	5	0	3	11	0.59	5.08475	8.47458	0	5.08475	18.6441	1.04922	0	3	0	0	3
1535	1	CHAI	-39.94	-73.58	7	1	0.153	9.2	0	3	5	0	3	11	0.59	5.08475	8.47458	0	5.08475	18.6441	1.0086	0	3	0	0	3
1536	1	CHAI	-39.94	-73.58	7	1	0.156	9.1	0	3	5	0	3	11	0.59	5.08475	8.47458	0	5.08475	18.6441	1.00432	0	3	0	0	3
1537	2	CHAI	-39.94	-73.58	7	2	0.95	16.1	0	3	5	0	3	11	0.59	5.08475	8.47458	0	5.08475	18.6441	1.233	0	3	0	0	3
1538	2	CHAI	-39.94	-73.58	7	1	0.568	13.8	1	3	5	0	3	11	0.59	5.08475	8.47458	0	5.08475	18.6441	1.17026	0.30103	3	0	0	3
1539	2	CHAI	-39.94	-73.58	7	1	0.3	11.6	0	3	5	0	3	11	0.59	5.08475	8.47458	0	5.08475	18.6441	1.10037	0	3	0	0	3
1540	2	CHAI	-39.94	-73.58	7	1	0.175	9.5	0	3	5	0	3	11	0.59	5.08475	8.47458	0	5.08475	18.6441	1.02119	0	3	0	0	3
1541	2	CHAI	-39.94	-73.58	7	1	0.218	9.7	0	3	5	0	3	11	0.59	5.08475	8.47458	0	5.08475	18.6441	1.02938	0	3	0	0	3
1542	2	CHAI	-39.94	-73.58	7	1	0.127	8.9	0	3	5	0	3	11	0.59	5.08475	8.47458	0	5.08475	18.6441	0.995635	0	3	0	0	3
1543	3	CHAI	-39.94	-73.58	7	3	6.434	27.6	5	3	5	0	3	11	0.59	5.08475	8.47458	0	5.08475	18.6441	1.45637	0.778151	3	0	0	3
1544	3	CHAI	-39.94	-73.58	7	2	0.968	16.3	0	3	5	0	3	11	0.59	5.08475	8.47458	0	5.08475	18.6441	1.23805	0	3	0	0	3
1545	3	CHAI	-39.94	-73.58	7	2	0.567	13.4	1	3	5	0	3	11	0.59	5.08475	8.47458	0	5.08475	18.6441	1.15836	0.30103	3	0	0	3
1546	3	CHAI	-39.94	-73.58	7	1	0.553	13.8	1	3	5	0	3	11	0.59	5.08475	8.47458	0	5.08475	18.6441	1.17026	0.30103	3	0	0	3
1547	3	CHAI	-39.94	-73.58	7	2	0.231	11.3	0	3	5	0	3	11	0.59	5.08475	8.47458	0	5.08475	18.6441	1.08991	0	3	0	0	3
1548	3	CHAI	-39.94	-73.58	7	1	0.164	9.8	0	3	5	0	3	11	0.59	5.08475	8.47458	0	5.08475	18.6441	1.03342	0	3	0	0	3
1549	3	CHAI	-39.94	-73.58	7	1	0.159	9.4	0	3	5	0	3	11	0.59	5.08475	8.47458	0	5.08475	18.6441	1.01703	0	3	0	0	3
1550	3	CHAI	-39.94	-73.58	7	1	0.121	9.4	0	3	5	0	3	11	0.59	5.08475	8.47458	0	5.08475	18.6441	1.01703	0	3	0	0	3
1551	3	CHAI	-39.94	-73.58	7	1	0.137	9.6	0	3	5	0	3	11	0.59	5.08475	8.47458	0	5.08475	18.6441	1.02531	0	3	0	0	3
1552	4	CHAI	-39.94	-73.58	7	3	7.531	30.1	6	3	5	0	3	11	0.59	5.08475	8.47458	0	5.08475	18.6441	1.49276	0.845098	3	0	0	3
1553	4	CHAI	-39.94	-73.58	7	1	0.593	14.4	1	3	5	0	3	11	0.59	5.08475	8.47458	0	5.08475	18.6441	1.18752	0.30103	3	0	0	3
1554	4	CHAI	-39.94	-73.58	7	1	0.293	11.8	0	3	5	0	3	11	0.59	5.08475	8.47458	0	5.08475	18.6441	1.10721	0	3	0	0	3
1555	4	CHAI	-39.94	-73.58	7	1	0.286	12.1	0	3	5	0	3	11	0.59	5.08475	8.47458	0	5.08475	18.6441	1.11727	0	3	0	0	3
1556	4	CHAI	-39.94	-73.58	7	1	0.172	10.1	0	3	5	0	3	11	0.59	5.08475	8.47458	0	5.08475	18.6441	1.04532	0	3	0	0	3
1557	4	CHAI	-39.94	-73.58	7	1	0.171	10.1	0	3	5	0	3	11	0.59	5.08475	8.47458	0	5.08475	18.6441	1.04532	0	3	0	0	3
1558	4	CHAI	-39.94	-73.58	7	1	0.117	9.1	0	3	5	0	3	11	0.59	5.08475	8.47458	0	5.08475	18.6441	1.00432	0	3	0	0	3
1559	4	CHAI	-39.94	-73.58	7	1	0.112	8.8	0	3	5	0	3	11	0.59	5.08475	8.47458	0	5.08475	18.6441	0.991226	0	3	0	0	3
1560	1	CHEU	-39.4	-73.22	7	3	2.986	22.6	3	8	0	0	6	14	0.34	23.5294	0	0	17.6471	41.1765	1.37291	0.60206	2	1	0	3
1561	1	CHEU	-39.4	-73.22	7	3	2.649	21.2	9	8	0	0	6	14	0.34	23.5294	0	0	17.6471	41.1765	1.34635	1	2	1	0	3
1562	1	CHEU	-39.4	-73.22	7	3	0.857	16.5	0	8	0	0	6	14	0.34	23.5294	0	0	17.6471	41.1765	1.24304	0	2	1	0	3
1563	1	CHEU	-39.4	-73.22	7	3	0.856	14.9	1	8	0	0	6	14	0.34	23.5294	0	0	17.6471	41.1765	1.2014	0.30103	2	1	0	3
1564	1	CHEU	-39.4	-73.22	7	3	0.9908	19.9	1	8	0	0	6	14	0.34	23.5294	0	0	17.6471	41.1765	1.32015	0.30103	2	1	0	3
1565	1	CHEU	-39.4	-73.22	7	3	3.76	23.7	3	8	0	0	6	14	0.34	23.5294	0	0	17.6471	41.1765	1.3927	0.60206	2	1	0	3
1566	1	CHEU	-39.4	-73.22	7	3	0.988	16.3	0	8	0	0	6	14	0.34	23.5294	0	0	17.6471	41.1765	1.23805	0	2	1	0	3
1567	1	CHEU	-39.4	-73.22	7	3	0.558	13.3	2	8	0	0	6	14	0.34	23.5294	0	0	17.6471	41.1765	1.15534	0.477121	2	1	0	3
1568	2	CHEU	-39.4	-73.22	7	3	4.041	24.5	12	8	0	0	6	14	0.34	23.5294	0	0	17.6471	41.1765	1.40654	1.11394	2	1	0	3
1569	2	CHEU	-39.4	-73.22	7	2	2.69	21.5	1	8	0	0	6	14	0.34	23.5294	0	0	17.6471	41.1765	1.35218	0.30103	2	1	0	3
1570	2	CHEU	-39.4	-73.22	7	2	1.065	16.4	0	8	0	0	6	14	0.34	23.5294	0	0	17.6471	41.1765	1.24055	0	2	1	0	3
1571	2	CHEU	-39.4	-73.22	7	2	0.706	14.6	0	8	0	0	6	14	0.34	23.5294	0	0	17.6471	41.1765	1.19312	0	2	1	0	3
1572	2	CHEU	-39.4	-73.22	7	2	0.602	13.6	0	8	0	0	6	14	0.34	23.5294	0	0	17.6471	41.1765	1.16435	0	2	1	0	3
1573	2	CHEU	-39.4	-73.22	7	1	0.395	11.9	3	8	0	0	6	14	0.34	23.5294	0	0	17.6471	41.1765	1.11059	0.60206	2	1	0	3
1574	2	CHEU	-39.4	-73.22	7	1	0.96	16.3	0	8	0	0	6	14	0.34	23.5294	0	0	17.6471	41.1765	1.23805	0	2	1	0	3
1575	2	CHEU	-39.4	-73.22	7	2	0.409	12.3	1	8	0	0	6	14	0.34	23.5294	0	0	17.6471	41.1765	1.12385	0.30103	2	1	0	3
1576	2	CHEU	-39.4	-73.22	7	1	0.264	10.8	1	8	0	0	6	14	0.34	23.5294	0	0	17.6471	41.1765	1.07188	0.30103	2	1	0	3
1577	3	CHEU	-39.4	-73.22	7	3	6.09	29.1	12	8	0	0	6	14	0.34	23.5294	0	0	17.6471	41.1765	1.47857	1.11394	2	1	0	3
1578	3	CHEU	-39.4	-73.22	7	3	3.802	24.6	7	8	0	0	6	14	0.34	23.5294	0	0	17.6471	41.1765	1.40824	0.90309	2	1	0	3
1579	3	CHEU	-39.4	-73.22	7	3	3.77	24.1	4	8	0	0	6	14	0.34	23.5294	0	0	17.6471	41.1765	1.39967	0.69897	2	1	0	3
1580	3	CHEU	-39.4	-73.22	7	2	0.931	16.2	1	8	0	0	6	14	0.34	23.5294	0	0	17.6471	41.1765	1.23553	0.30103	2	1	0	3
1581	3	CHEU	-39.4	-73.22	7	1	0.369	11.1	0	8	0	0	6	14	0.34	23.5294	0	0	17.6471	41.1765	1.08279	0	2	1	0	3
1582	3	CHEU	-39.4	-73.22	7	1	0.258	10.6	0	8	0	0	6	14	0.34	23.5294	0	0	17.6471	41.1765	1.06446	0	2	1	0	3
1583	3	CHEU	-39.4	-73.22	7	1	0.196	10.2	0	8	0	0	6	14	0.34	23.5294	0	0	17.6471	41.1765	1.04922	0	2	1	0	3
1584	4	CHEU	-39.4	-73.22	7	3	4.837	27.1	7	8	0	0	6	14	0.34	23.5294	0	0	17.6471	41.1765	1.44871	0.90309	2	1	0	3
1585	4	CHEU	-39.4	-73.22	7	3	2.708	21.8	3	8	0	0	6	14	0.34	23.5294	0	0	17.6471	41.1765	1.35793	0.60206	2	1	0	3
1586	4	CHEU	-39.4	-73.22	7	2	1.006	17.6	0	8	0	0	6	14	0.34	23.5294	0	0	17.6471	41.1765	1.26951	0	2	1	0	3
1587	4	CHEU	-39.4	-73.22	7	2	0.838	15.6	1	8	0	0	6	14	0.34	23.5294	0	0	17.6471	41.1765	1.22011	0.30103	2	1	0	3
1588	4	CHEU	-39.4	-73.22	7	2	0.973	16.2	0	8	0	0	6	14	0.34	23.5294	0	0	17.6471	41.1765	1.23553	0	2	1	0	3
1589	4	CHEU	-39.4	-73.22	7	2	0.541	13.3	1	8	0	0	6	14	0.34	23.5294	0	0	17.6471	41.1765	1.15534	0.30103	2	1	0	3
1590	4	CHEU	-39.4	-73.22	7	1	0.213	10.1	0	8	0	0	6	14	0.34	23.5294	0	0	17.6471	41.1765	1.04532	0	2	1	0	3
1591	1	CURI	-39.73	-73.39	7	3	2.011	22.3	2	0	37	0	2	39	0.92	0	40.2174	0	2.17391	42.3913	1.36736	0.477121	3	2	0	5
1592	1	CURI	-39.73	-73.39	7	3	1.907	19.8	3	0	37	0	2	39	0.92	0	40.2174	0	2.17391	42.3913	1.31806	0.60206	3	2	0	5
1593	1	CURI	-39.73	-73.39	7	1	0.682	14	1	0	37	0	2	39	0.92	0	40.2174	0	2.17391	42.3913	1.17609	0.30103	3	2	0	5
1594	1	CURI	-39.73	-73.39	7	1	0.548	13.9	1	0	37	0	2	39	0.92	0	40.2174	0	2.17391	42.3913	1.17319	0.30103	3	2	0	5
1595	1	CURI	-39.73	-73.39	7	1	0.64	14.1	2	0	37	0	2	39	0.92	0	40.2174	0	2.17391	42.3913	1.17898	0.477121	3	2	0	5
1596	1	CURI	-39.73	-73.39	7	1	0.588	13.7	2	0	37	0	2	39	0.92	0	40.2174	0	2.17391	42.3913	1.16732	0.477121	3	2	0	5
1597	2	CURI	-39.73	-73.39	7	3	4.007	24.5	2	0	37	0	2	39	0.92	0	40.2174	0	2.17391	42.3913	1.40654	0.477121	3	2	0	5
1598	2	CURI	-39.73	-73.39	7	3	3.624	24.6	6	0	37	0	2	39	0.92	0	40.2174	0	2.17391	42.3913	1.40824	0.845098	3	2	0	5
1599	2	CURI	-39.73	-73.39	7	2	1.296	18	3	0	37	0	2	39	0.92	0	40.2174	0	2.17391	42.3913	1.27875	0.60206	3	2	0	5
1600	2	CURI	-39.73	-73.39	7	2	0.946	16	4	0	37	0	2	39	0.92	0	40.2174	0	2.17391	42.3913	1.23045	0.69897	3	2	0	5
1601	2	CURI	-39.73	-73.39	7	2	1.092	16.4	7	0	37	0	2	39	0.92	0	40.2174	0	2.17391	42.3913	1.24055	0.90309	3	2	0	5
1602	2	CURI	-39.73	-73.39	7	2	0.674	14.5	5	0	37	0	2	39	0.92	0	40.2174	0	2.17391	42.3913	1.19033	0.778151	3	2	0	5
1603	2	CURI	-39.73	-73.39	7	1	0.494	12.9	2	0	37	0	2	39	0.92	0	40.2174	0	2.17391	42.3913	1.14301	0.477121	3	2	0	5
1604	2	CURI	-39.73	-73.39	7	1	0.515	13.7	2	0	37	0	2	39	0.92	0	40.2174	0	2.17391	42.3913	1.16732	0.477121	3	2	0	5
1605	2	CURI	-39.73	-73.39	7	1	0.6	13.4	2	0	37	0	2	39	0.92	0	40.2174	0	2.17391	42.3913	1.15836	0.477121	3	2	0	5
1606	2	CURI	-39.73	-73.39	7	1	0.367	12.4	1	0	37	0	2	39	0.92	0	40.2174	0	2.17391	42.3913	1.1271	0.30103	3	2	0	5
1607	2	CURI	-39.73	-73.39	7	2	0.428	12.3	0	0	37	0	2	39	0.92	0	40.2174	0	2.17391	42.3913	1.12385	0	3	2	0	5
1608	2	CURI	-39.73	-73.39	7	2	0.342	11.9	0	0	37	0	2	39	0.92	0	40.2174	0	2.17391	42.3913	1.11059	0	3	2	0	5
1609	2	CURI	-39.73	-73.39	7	1	0.268	10.6	1	0	37	0	2	39	0.92	0	40.2174	0	2.17391	42.3913	1.06446	0.30103	3	2	0	5
1610	2	CURI	-39.73	-73.39	7	1	0.251	10.5	0	0	37	0	2	39	0.92	0	40.2174	0	2.17391	42.3913	1.0607	0	3	2	0	5
1611	2	CURI	-39.73	-73.39	7	1	0.261	10.5	0	0	37	0	2	39	0.92	0	40.2174	0	2.17391	42.3913	1.0607	0	3	2	0	5
1612	2	CURI	-39.73	-73.39	7	1	0.197	10.4	0	0	37	0	2	39	0.92	0	40.2174	0	2.17391	42.3913	1.0569	0	3	2	0	5
1613	2	CURI	-39.73	-73.39	7	1	0.173	10.3	0	0	37	0	2	39	0.92	0	40.2174	0	2.17391	42.3913	1.05308	0	3	2	0	5
1614	2	CURI	-39.73	-73.39	7	1	0.228	10.3	0	0	37	0	2	39	0.92	0	40.2174	0	2.17391	42.3913	1.05308	0	3	2	0	5
1615	2	CURI	-39.73	-73.39	7	1	0.259	10.3	0	0	37	0	2	39	0.92	0	40.2174	0	2.17391	42.3913	1.05308	0	3	2	0	5
1616	2	CURI	-39.73	-73.39	7	1	0.201	10	0	0	37	0	2	39	0.92	0	40.2174	0	2.17391	42.3913	1.04139	0	3	2	0	5
1617	2	CURI	-39.73	-73.39	7	1	0.159	0.95	0	0	37	0	2	39	0.92	0	40.2174	0	2.17391	42.3913	0.290035	0	3	2	0	5
1618	3	CURI	-39.73	-73.39	7	3	4.424	25.9	5	0	37	0	2	39	0.92	0	40.2174	0	2.17391	42.3913	1.42975	0.778151	3	2	0	5
1619	3	CURI	-39.73	-73.39	7	3	2.805	22.6	2	0	37	0	2	39	0.92	0	40.2174	0	2.17391	42.3913	1.37291	0.477121	3	2	0	5
1620	3	CURI	-39.73	-73.39	7	3	2.419	20.9	0	0	37	0	2	39	0.92	0	40.2174	0	2.17391	42.3913	1.34044	0	3	2	0	5
1621	3	CURI	-39.73	-73.39	7	3	2.087	20.7	3	0	37	0	2	39	0.92	0	40.2174	0	2.17391	42.3913	1.33646	0.60206	3	2	0	5
1622	3	CURI	-39.73	-73.39	7	2	0.676	14.5	4	0	37	0	2	39	0.92	0	40.2174	0	2.17391	42.3913	1.19033	0.69897	3	2	0	5
1623	3	CURI	-39.73	-73.39	7	1	0.523	13.5	2	0	37	0	2	39	0.92	0	40.2174	0	2.17391	42.3913	1.16137	0.477121	3	2	0	5
1624	3	CURI	-39.73	-73.39	7	1	0.479	12.4	4	0	37	0	2	39	0.92	0	40.2174	0	2.17391	42.3913	1.1271	0.69897	3	2	0	5
1625	3	CURI	-39.73	-73.39	7	1	0.264	11.7	0	0	37	0	2	39	0.92	0	40.2174	0	2.17391	42.3913	1.1038	0	3	2	0	5
1626	3	CURI	-39.73	-73.39	7	2	0.203	11.6	0	0	37	0	2	39	0.92	0	40.2174	0	2.17391	42.3913	1.10037	0	3	2	0	5
1627	4	CURI	-39.73	-73.39	7	3	4.545	24.8	7	0	37	0	2	39	0.92	0	40.2174	0	2.17391	42.3913	1.41162	0.90309	3	2	0	5
1628	4	CURI	-39.73	-73.39	7	3	4.452	25.4	3	0	37	0	2	39	0.92	0	40.2174	0	2.17391	42.3913	1.4216	0.60206	3	2	0	5
1629	4	CURI	-39.73	-73.39	7	3	3.642	23.7	3	0	37	0	2	39	0.92	0	40.2174	0	2.17391	42.3913	1.3927	0.60206	3	2	0	5
1630	4	CURI	-39.73	-73.39	7	3	3.839	23.7	3	0	37	0	2	39	0.92	0	40.2174	0	2.17391	42.3913	1.3927	0.60206	3	2	0	5
1631	4	CURI	-39.73	-73.39	7	3	2.733	24.1	2	0	37	0	2	39	0.92	0	40.2174	0	2.17391	42.3913	1.39967	0.477121	3	2	0	5
1632	4	CURI	-39.73	-73.39	7	3	1.65	18.7	2	0	37	0	2	39	0.92	0	40.2174	0	2.17391	42.3913	1.29447	0.477121	3	2	0	5
1633	4	CURI	-39.73	-73.39	7	1	0.885	15.2	3	0	37	0	2	39	0.92	0	40.2174	0	2.17391	42.3913	1.20952	0.60206	3	2	0	5
1634	4	CURI	-39.73	-73.39	7	2	0.406	12.3	0	0	37	0	2	39	0.92	0	40.2174	0	2.17391	42.3913	1.12385	0	3	2	0	5
1635	4	CURI	-39.73	-73.39	7	1	0.388	11.9	1	0	37	0	2	39	0.92	0	40.2174	0	2.17391	42.3913	1.11059	0.30103	3	2	0	5
1636	4	CURI	-39.73	-73.39	7	1	0.248	10.7	0	0	37	0	2	39	0.92	0	40.2174	0	2.17391	42.3913	1.06819	0	3	2	0	5
1637	4	CURI	-39.73	-73.39	7	1	0.233	10.1	0	0	37	0	2	39	0.92	0	40.2174	0	2.17391	42.3913	1.04532	0	3	2	0	5
1638	4	CURI	-39.73	-73.39	7	1	0.214	9.9	0	0	37	0	2	39	0.92	0	40.2174	0	2.17391	42.3913	1.03743	0	3	2	0	5
1639	1	CALF	-39.79	-73.39	8	3	4.4	24.7	2	8	38	0	0	46	0.8	10	47.5	0	0	57.5	1.40993	0.477121	6	3	0	9
1640	1	CALF	-39.79	-73.39	8	3	5.123	26.3	3	8	38	0	0	46	0.8	10	47.5	0	0	57.5	1.43616	0.60206	6	3	0	9
1641	1	CALF	-39.79	-73.39	8	3	5.085	27.3	3	8	38	0	0	46	0.8	10	47.5	0	0	57.5	1.45179	0.60206	6	3	0	9
1642	1	CALF	-39.79	-73.39	8	3	5.358	26.6	1	8	38	0	0	46	0.8	10	47.5	0	0	57.5	1.44091	0.30103	6	3	0	9
1643	1	CALF	-39.79	-73.39	8	3	5.098	26.6	3	8	38	0	0	46	0.8	10	47.5	0	0	57.5	1.44091	0.60206	6	3	0	9
1644	1	CALF	-39.79	-73.39	8	2	0.988	15	0	8	38	0	0	46	0.8	10	47.5	0	0	57.5	1.20412	0	6	3	0	9
1645	1	CALF	-39.79	-73.39	8	1	0.312	11.1	1	8	38	0	0	46	0.8	10	47.5	0	0	57.5	1.08279	0.30103	6	3	0	9
1646	1	CALF	-39.79	-73.39	8	1	0.048	6.4	0	8	38	0	0	46	0.8	10	47.5	0	0	57.5	0.869232	0	6	3	0	9
1647	2	CALF	-39.79	-73.39	8	3	2.782	21.9	2	8	38	0	0	46	0.8	10	47.5	0	0	57.5	1.35984	0.477121	6	3	0	9
1648	2	CALF	-39.79	-73.39	8	1	0.542	12.2	0	8	38	0	0	46	0.8	10	47.5	0	0	57.5	1.12057	0	6	3	0	9
1649	2	CALF	-39.79	-73.39	8	1	0.635	13.8	3	8	38	0	0	46	0.8	10	47.5	0	0	57.5	1.17026	0.60206	6	3	0	9
1650	2	CALF	-39.79	-73.39	8	1	0.492	12.8	1	8	38	0	0	46	0.8	10	47.5	0	0	57.5	1.13988	0.30103	6	3	0	9
1651	2	CALF	-39.79	-73.39	8	1	0.243	10	0	8	38	0	0	46	0.8	10	47.5	0	0	57.5	1.04139	0	6	3	0	9
1652	2	CALF	-39.79	-73.39	8	1	0.269	10.1	0	8	38	0	0	46	0.8	10	47.5	0	0	57.5	1.04532	0	6	3	0	9
1653	2	CALF	-39.79	-73.39	8	1	0.259	10.5	0	8	38	0	0	46	0.8	10	47.5	0	0	57.5	1.0607	0	6	3	0	9
1654	3	CALF	-39.79	-73.39	8	3	10.81	32.1	11	8	38	0	0	46	0.8	10	47.5	0	0	57.5	1.51983	1.07918	6	3	0	9
1655	3	CALF	-39.79	-73.39	8	3	5.806	27.7	2	8	38	0	0	46	0.8	10	47.5	0	0	57.5	1.45788	0.477121	6	3	0	9
1656	3	CALF	-39.79	-73.39	8	3	5.374	26.9	4	8	38	0	0	46	0.8	10	47.5	0	0	57.5	1.4456	0.69897	6	3	0	9
1657	3	CALF	-39.79	-73.39	8	3	4.931	25.4	1	8	38	0	0	46	0.8	10	47.5	0	0	57.5	1.4216	0.30103	6	3	0	9
1658	3	CALF	-39.79	-73.39	8	2	1.032	15	1	8	38	0	0	46	0.8	10	47.5	0	0	57.5	1.20412	0.30103	6	3	0	9
1659	3	CALF	-39.79	-73.39	8	1	0.681	13.7	2	8	38	0	0	46	0.8	10	47.5	0	0	57.5	1.16732	0.477121	6	3	0	9
1660	3	CALF	-39.79	-73.39	8	1	0.777	13.6	2	8	38	0	0	46	0.8	10	47.5	0	0	57.5	1.16435	0.477121	6	3	0	9
1661	3	CALF	-39.79	-73.39	8	1	0.324	10.5	0	8	38	0	0	46	0.8	10	47.5	0	0	57.5	1.0607	0	6	3	0	9
1662	3	CALF	-39.79	-73.39	8	1	0.262	10.5	0	8	38	0	0	46	0.8	10	47.5	0	0	57.5	1.0607	0	6	3	0	9
1663	3	CALF	-39.79	-73.39	8	1	0.288	10.3	0	8	38	0	0	46	0.8	10	47.5	0	0	57.5	1.05308	0	6	3	0	9
1664	3	CALF	-39.79	-73.39	8	1	0.13	0.85	0	8	38	0	0	46	0.8	10	47.5	0	0	57.5	0.267172	0	6	3	0	9
1665	3	CALF	-39.79	-73.39	8	1	0.091	0.81	0	8	38	0	0	46	0.8	10	47.5	0	0	57.5	0.257679	0	6	3	0	9
1666	3	CALF	-39.79	-73.39	8	1	0.035	0.65	0	8	38	0	0	46	0.8	10	47.5	0	0	57.5	0.217484	0	6	3	0	9
1667	4	CALF	-39.79	-73.39	8	3	4.741	26.7	2	8	38	0	0	46	0.8	10	47.5	0	0	57.5	1.44248	0.477121	6	3	0	9
1668	4	CALF	-39.79	-73.39	8	2	0.588	12.9	1	8	38	0	0	46	0.8	10	47.5	0	0	57.5	1.14301	0.30103	6	3	0	9
1669	4	CALF	-39.79	-73.39	8	1	0.807	14.5	0	8	38	0	0	46	0.8	10	47.5	0	0	57.5	1.19033	0	6	3	0	9
1670	4	CALF	-39.79	-73.39	8	1	0.794	14.6	2	8	38	0	0	46	0.8	10	47.5	0	0	57.5	1.19312	0.477121	6	3	0	9
1671	4	CALF	-39.79	-73.39	8	2	0.681	13.9	0	8	38	0	0	46	0.8	10	47.5	0	0	57.5	1.17319	0	6	3	0	9
1672	4	CALF	-39.79	-73.39	8	2	0.605	13.4	1	8	38	0	0	46	0.8	10	47.5	0	0	57.5	1.15836	0.30103	6	3	0	9
1673	4	CALF	-39.79	-73.39	8	2	0.526	13.2	0	8	38	0	0	46	0.8	10	47.5	0	0	57.5	1.15229	0	6	3	0	9
1674	4	CALF	-39.79	-73.39	8	1	0.312	12	0	8	38	0	0	46	0.8	10	47.5	0	0	57.5	1.11394	0	6	3	0	9
1675	4	CALF	-39.79	-73.39	8	1	0.506	12.6	2	8	38	0	0	46	0.8	10	47.5	0	0	57.5	1.13354	0.477121	6	3	0	9
1676	4	CALF	-39.79	-73.39	8	2	0.449	11.9	0	8	38	0	0	46	0.8	10	47.5	0	0	57.5	1.11059	0	6	3	0	9
1677	4	CALF	-39.79	-73.39	8	1	0.308	10.9	0	8	38	0	0	46	0.8	10	47.5	0	0	57.5	1.07555	0	6	3	0	9
1678	4	CALF	-39.79	-73.39	8	1	0.21	9.9	0	8	38	0	0	46	0.8	10	47.5	0	0	57.5	1.03743	0	6	3	0	9
1679	4	CALF	-39.79	-73.39	8	1	0.161	9	0	8	38	0	0	46	0.8	10	47.5	0	0	57.5	1	0	6	3	0	9
1680	4	CALF	-39.79	-73.39	8	1	0.019	6.1	0	8	38	0	0	46	0.8	10	47.5	0	0	57.5	0.851258	0	6	3	0	9
1681	4	CALF	-39.79	-73.39	8	1	0.03	6.5	0	8	38	0	0	46	0.8	10	47.5	0	0	57.5	0.875061	0	6	3	0	9
1682	4	CALF	-39.79	-73.39	8	1	0.021	5.8	0	8	38	0	0	46	0.8	10	47.5	0	0	57.5	0.832509	0	6	3	0	9
1683	4	CALF	-39.79	-73.39	8	1	0.023	6	0	8	38	0	0	46	0.8	10	47.5	0	0	57.5	0.845098	0	6	3	0	9
1684	1	CHAI	-39.94	-73.58	8	3	4.758	26.9	5	1	3	0	5	9	0.59	1.69492	5.08475	0	8.47458	15.2542	1.4456	0.778151	5	1	0	6
1685	1	CHAI	-39.94	-73.58	8	2	2.43	22.9	2	1	3	0	5	9	0.59	1.69492	5.08475	0	8.47458	15.2542	1.3784	0.477121	5	1	0	6
1686	1	CHAI	-39.94	-73.58	8	3	2.914	23.7	7	1	3	0	5	9	0.59	1.69492	5.08475	0	8.47458	15.2542	1.3927	0.90309	5	1	0	6
1687	1	CHAI	-39.94	-73.58	8	3	2.662	24.3	2	1	3	0	5	9	0.59	1.69492	5.08475	0	8.47458	15.2542	1.40312	0.477121	5	1	0	6
1688	1	CHAI	-39.94	-73.58	8	3	2.81	25	3	1	3	0	5	9	0.59	1.69492	5.08475	0	8.47458	15.2542	1.41497	0.60206	5	1	0	6
1689	1	CHAI	-39.94	-73.58	8	3	2.179	22.6	2	1	3	0	5	9	0.59	1.69492	5.08475	0	8.47458	15.2542	1.37291	0.477121	5	1	0	6
1690	1	CHAI	-39.94	-73.58	8	3	3.24	24.8	2	1	3	0	5	9	0.59	1.69492	5.08475	0	8.47458	15.2542	1.41162	0.477121	5	1	0	6
1691	1	CHAI	-39.94	-73.58	8	3	1.286	19.7	1	1	3	0	5	9	0.59	1.69492	5.08475	0	8.47458	15.2542	1.31597	0.30103	5	1	0	6
1692	1	CHAI	-39.94	-73.58	8	2	0.78	14.2	0	1	3	0	5	9	0.59	1.69492	5.08475	0	8.47458	15.2542	1.18184	0	5	1	0	6
1693	2	CHAI	-39.94	-73.58	8	1	0.64	13.8	1	1	3	0	5	9	0.59	1.69492	5.08475	0	8.47458	15.2542	1.17026	0.30103	5	1	0	6
1694	2	CHAI	-39.94	-73.58	8	1	0.79	14.5	0	1	3	0	5	9	0.59	1.69492	5.08475	0	8.47458	15.2542	1.19033	0	5	1	0	6
1695	2	CHAI	-39.94	-73.58	8	1	0.206	10.5	0	1	3	0	5	9	0.59	1.69492	5.08475	0	8.47458	15.2542	1.0607	0	5	1	0	6
1696	2	CHAI	-39.94	-73.58	8	2	0.265	11.8	0	1	3	0	5	9	0.59	1.69492	5.08475	0	8.47458	15.2542	1.10721	0	5	1	0	6
1697	3	CHAI	-39.94	-73.58	8	1	0.763	14.3	1	1	3	0	5	9	0.59	1.69492	5.08475	0	8.47458	15.2542	1.18469	0.30103	5	1	0	6
1698	3	CHAI	-39.94	-73.58	8	1	0.44	12.7	0	1	3	0	5	9	0.59	1.69492	5.08475	0	8.47458	15.2542	1.13672	0	5	1	0	6
1699	3	CHAI	-39.94	-73.58	8	2	1.97	19.7	2	1	3	0	5	9	0.59	1.69492	5.08475	0	8.47458	15.2542	1.31597	0.477121	5	1	0	6
1700	3	CHAI	-39.94	-73.58	8	1	0.147	9.5	0	1	3	0	5	9	0.59	1.69492	5.08475	0	8.47458	15.2542	1.02119	0	5	1	0	6
1701	3	CHAI	-39.94	-73.58	8	1	0.15	9.7	0	1	3	0	5	9	0.59	1.69492	5.08475	0	8.47458	15.2542	1.02938	0	5	1	0	6
1702	4	CHAI	-39.94	-73.58	8	2	2.7	24.5	3	1	3	0	5	9	0.59	1.69492	5.08475	0	8.47458	15.2542	1.40654	0.60206	5	1	0	6
1703	4	CHAI	-39.94	-73.58	8	2	0.205	11.7	0	1	3	0	5	9	0.59	1.69492	5.08475	0	8.47458	15.2542	1.1038	0	5	1	0	6
1704	4	CHAI	-39.94	-73.58	8	3	2.119	21.3	0	1	3	0	5	9	0.59	1.69492	5.08475	0	8.47458	15.2542	1.3483	0	5	1	0	6
1705	4	CHAI	-39.94	-73.58	8	3	3.11	24.6	2	1	3	0	5	9	0.59	1.69492	5.08475	0	8.47458	15.2542	1.40824	0.477121	5	1	0	6
1706	4	CHAI	-39.94	-73.58	8	3	3.15	24.7	3	1	3	0	5	9	0.59	1.69492	5.08475	0	8.47458	15.2542	1.40993	0.60206	5	1	0	6
1707	1	CHEU	-39.4	-73.22	8	3	4.988	29.9	7	5	0	0	1	6	0.34	14.7059	0	0	2.94118	17.6471	1.48996	0.90309	3	3	0	6
1708	1	CHEU	-39.4	-73.22	8	3	3.24	25.6	9	5	0	0	1	6	0.34	14.7059	0	0	2.94118	17.6471	1.42488	1	3	3	0	6
1709	1	CHEU	-39.4	-73.22	8	3	5.92	26.3	10	5	0	0	1	6	0.34	14.7059	0	0	2.94118	17.6471	1.43616	1.04139	3	3	0	6
1710	1	CHEU	-39.4	-73.22	8	3	3.624	24.1	1	5	0	0	1	6	0.34	14.7059	0	0	2.94118	17.6471	1.39967	0.30103	3	3	0	6
1711	1	CHEU	-39.4	-73.22	8	3	2.73	22.9	1	5	0	0	1	6	0.34	14.7059	0	0	2.94118	17.6471	1.3784	0.30103	3	3	0	6
1712	1	CHEU	-39.4	-73.22	8	3	3.188	23.5	4	5	0	0	1	6	0.34	14.7059	0	0	2.94118	17.6471	1.38917	0.69897	3	3	0	6
1713	1	CHEU	-39.4	-73.22	8	3	3.153	23.7	5	5	0	0	1	6	0.34	14.7059	0	0	2.94118	17.6471	1.3927	0.778151	3	3	0	6
1714	1	CHEU	-39.4	-73.22	8	3	1.725	20.5	3	5	0	0	1	6	0.34	14.7059	0	0	2.94118	17.6471	1.33244	0.60206	3	3	0	6
1715	1	CHEU	-39.4	-73.22	8	2	0.948	16.3	0	5	0	0	1	6	0.34	14.7059	0	0	2.94118	17.6471	1.23805	0	3	3	0	6
1716	2	CHEU	-39.4	-73.22	8	3	3.989	27.6	12	5	0	0	1	6	0.34	14.7059	0	0	2.94118	17.6471	1.45637	1.11394	3	3	0	6
1717	2	CHEU	-39.4	-73.22	8	3	5.312	26.7	14	5	0	0	1	6	0.34	14.7059	0	0	2.94118	17.6471	1.44248	1.17609	3	3	0	6
1718	2	CHEU	-39.4	-73.22	8	3	4.953	27.3	6	5	0	0	1	6	0.34	14.7059	0	0	2.94118	17.6471	1.45179	0.845098	3	3	0	6
1719	2	CHEU	-39.4	-73.22	8	3	3.023	22.2	5	5	0	0	1	6	0.34	14.7059	0	0	2.94118	17.6471	1.36549	0.778151	3	3	0	6
1720	2	CHEU	-39.4	-73.22	8	3	2.759	21.4	4	5	0	0	1	6	0.34	14.7059	0	0	2.94118	17.6471	1.35025	0.69897	3	3	0	6
1721	2	CHEU	-39.4	-73.22	8	1	0.63	14	4	5	0	0	1	6	0.34	14.7059	0	0	2.94118	17.6471	1.17609	0.69897	3	3	0	6
1722	2	CHEU	-39.4	-73.22	8	1	0.472	12.5	0	5	0	0	1	6	0.34	14.7059	0	0	2.94118	17.6471	1.13033	0	3	3	0	6
1723	2	CHEU	-39.4	-73.22	8	1	0.463	13	2	5	0	0	1	6	0.34	14.7059	0	0	2.94118	17.6471	1.14613	0.477121	3	3	0	6
1724	2	CHEU	-39.4	-73.22	8	1	0.552	13	1	5	0	0	1	6	0.34	14.7059	0	0	2.94118	17.6471	1.14613	0.30103	3	3	0	6
1725	2	CHEU	-39.4	-73.22	8	2	0.26	10.5	1	5	0	0	1	6	0.34	14.7059	0	0	2.94118	17.6471	1.0607	0.30103	3	3	0	6
1726	3	CHEU	-39.4	-73.22	8	3	6.752	29.7	22	5	0	0	1	6	0.34	14.7059	0	0	2.94118	17.6471	1.48714	1.36173	3	3	0	6
1727	3	CHEU	-39.4	-73.22	8	3	4.151	25.5	5	5	0	0	1	6	0.34	14.7059	0	0	2.94118	17.6471	1.42325	0.778151	3	3	0	6
1728	3	CHEU	-39.4	-73.22	8	3	4.009	25.6	15	5	0	0	1	6	0.34	14.7059	0	0	2.94118	17.6471	1.42488	1.20412	3	3	0	6
1729	3	CHEU	-39.4	-73.22	8	3	4.432	25.2	8	5	0	0	1	6	0.34	14.7059	0	0	2.94118	17.6471	1.4183	0.954243	3	3	0	6
1730	3	CHEU	-39.4	-73.22	8	3	3.816	24.4	6	5	0	0	1	6	0.34	14.7059	0	0	2.94118	17.6471	1.40483	0.845098	3	3	0	6
1731	3	CHEU	-39.4	-73.22	8	3	3.182	23.7	8	5	0	0	1	6	0.34	14.7059	0	0	2.94118	17.6471	1.3927	0.954243	3	3	0	6
1732	3	CHEU	-39.4	-73.22	8	2	0.943	16.1	4	5	0	0	1	6	0.34	14.7059	0	0	2.94118	17.6471	1.233	0.69897	3	3	0	6
1733	3	CHEU	-39.4	-73.22	8	1	0.88	15.9	0	5	0	0	1	6	0.34	14.7059	0	0	2.94118	17.6471	1.22789	0	3	3	0	6
1734	3	CHEU	-39.4	-73.22	8	1	0.696	14.6	3	5	0	0	1	6	0.34	14.7059	0	0	2.94118	17.6471	1.19312	0.60206	3	3	0	6
1735	3	CHEU	-39.4	-73.22	8	1	0.652	14.3	0	5	0	0	1	6	0.34	14.7059	0	0	2.94118	17.6471	1.18469	0	3	3	0	6
1736	3	CHEU	-39.4	-73.22	8	1	0.671	14.4	2	5	0	0	1	6	0.34	14.7059	0	0	2.94118	17.6471	1.18752	0.477121	3	3	0	6
1737	3	CHEU	-39.4	-73.22	8	1	0.591	13.6	1	5	0	0	1	6	0.34	14.7059	0	0	2.94118	17.6471	1.16435	0.30103	3	3	0	6
1738	3	CHEU	-39.4	-73.22	8	1	0.502	13.1	2	5	0	0	1	6	0.34	14.7059	0	0	2.94118	17.6471	1.14922	0.477121	3	3	0	6
1739	3	CHEU	-39.4	-73.22	8	1	0.262	10.3	0	5	0	0	1	6	0.34	14.7059	0	0	2.94118	17.6471	1.05308	0	3	3	0	6
1740	4	CHEU	-39.4	-73.22	8	3	4.131	25.1	7	5	0	0	1	6	0.34	14.7059	0	0	2.94118	17.6471	1.41664	0.90309	3	3	0	6
1741	4	CHEU	-39.4	-73.22	8	1	0.881	16.5	0	5	0	0	1	6	0.34	14.7059	0	0	2.94118	17.6471	1.24304	0	3	3	0	6
1742	4	CHEU	-39.4	-73.22	8	2	0.786	10.5	1	5	0	0	1	6	0.34	14.7059	0	0	2.94118	17.6471	1.0607	0.30103	3	3	0	6
1743	4	CHEU	-39.4	-73.22	8	2	0.727	15.3	1	5	0	0	1	6	0.34	14.7059	0	0	2.94118	17.6471	1.21219	0.30103	3	3	0	6
1744	4	CHEU	-39.4	-73.22	8	2	0.762	15.1	2	5	0	0	1	6	0.34	14.7059	0	0	2.94118	17.6471	1.20683	0.477121	3	3	0	6
1745	4	CHEU	-39.4	-73.22	8	1	0.549	13.2	7	5	0	0	1	6	0.34	14.7059	0	0	2.94118	17.6471	1.15229	0.90309	3	3	0	6
1746	4	CHEU	-39.4	-73.22	8	1	0.276	10.4	0	5	0	0	1	6	0.34	14.7059	0	0	2.94118	17.6471	1.0569	0	3	3	0	6
1747	1	CURI	-39.73	-73.39	8	3	2.264	19.7	1	5	5	0	0	10	0.92	5.43478	5.43478	0	0	10.8696	1.31597	0.30103	9	4	0	13
1748	1	CURI	-39.73	-73.39	8	3	2.633	20.8	2	5	5	0	0	10	0.92	5.43478	5.43478	0	0	10.8696	1.33846	0.477121	9	4	0	13
1749	1	CURI	-39.73	-73.39	8	1	0.926	14.4	5	5	5	0	0	10	0.92	5.43478	5.43478	0	0	10.8696	1.18752	0.778151	9	4	0	13
1750	1	CURI	-39.73	-73.39	8	1	0.988	13.9	2	5	5	0	0	10	0.92	5.43478	5.43478	0	0	10.8696	1.17319	0.477121	9	4	0	13
1751	1	CURI	-39.73	-73.39	8	1	1.104	15.6	1	5	5	0	0	10	0.92	5.43478	5.43478	0	0	10.8696	1.22011	0.30103	9	4	0	13
1752	1	CURI	-39.73	-73.39	8	2	0.851	14	0	5	5	0	0	10	0.92	5.43478	5.43478	0	0	10.8696	1.17609	0	9	4	0	13
1753	1	CURI	-39.73	-73.39	8	2	0.596	12.5	0	5	5	0	0	10	0.92	5.43478	5.43478	0	0	10.8696	1.13033	0	9	4	0	13
1754	1	CURI	-39.73	-73.39	8	1	0.589	12.3	0	5	5	0	0	10	0.92	5.43478	5.43478	0	0	10.8696	1.12385	0	9	4	0	13
1755	1	CURI	-39.73	-73.39	8	1	0.104	7.2	0	5	5	0	0	10	0.92	5.43478	5.43478	0	0	10.8696	0.913814	0	9	4	0	13
1756	2	CURI	-39.73	-73.39	8	3	2.102	19.3	3	5	5	0	0	10	0.92	5.43478	5.43478	0	0	10.8696	1.3075	0.60206	9	4	0	13
1757	2	CURI	-39.73	-73.39	8	2	0.859	14.6	2	5	5	0	0	10	0.92	5.43478	5.43478	0	0	10.8696	1.19312	0.477121	9	4	0	13
1758	2	CURI	-39.73	-73.39	8	2	0.269	10.2	0	5	5	0	0	10	0.92	5.43478	5.43478	0	0	10.8696	1.04922	0	9	4	0	13
1759	2	CURI	-39.73	-73.39	8	2	0.67	14.7	1	5	5	0	0	10	0.92	5.43478	5.43478	0	0	10.8696	1.1959	0.30103	9	4	0	13
1760	2	CURI	-39.73	-73.39	8	1	0.075	6.4	0	5	5	0	0	10	0.92	5.43478	5.43478	0	0	10.8696	0.869232	0	9	4	0	13
1761	2	CURI	-39.73	-73.39	8	1	0.062	6.4	0	5	5	0	0	10	0.92	5.43478	5.43478	0	0	10.8696	0.869232	0	9	4	0	13
1762	2	CURI	-39.73	-73.39	8	3	3.28	23.2	2	5	5	0	0	10	0.92	5.43478	5.43478	0	0	10.8696	1.38382	0.477121	9	4	0	13
1763	3	CURI	-39.73	-73.39	8	3	4.678	25.7	1	5	5	0	0	10	0.92	5.43478	5.43478	0	0	10.8696	1.42651	0.30103	9	4	0	13
1764	3	CURI	-39.73	-73.39	8	3	5.248	26.1	4	5	5	0	0	10	0.92	5.43478	5.43478	0	0	10.8696	1.43297	0.69897	9	4	0	13
1765	3	CURI	-39.73	-73.39	8	3	3.619	23.6	0	5	5	0	0	10	0.92	5.43478	5.43478	0	0	10.8696	1.39094	0	9	4	0	13
1766	3	CURI	-39.73	-73.39	8	3	2.666	21.2	1	5	5	0	0	10	0.92	5.43478	5.43478	0	0	10.8696	1.34635	0.30103	9	4	0	13
1767	3	CURI	-39.73	-73.39	8	3	3.76	24.8	3	5	5	0	0	10	0.92	5.43478	5.43478	0	0	10.8696	1.41162	0.60206	9	4	0	13
1768	3	CURI	-39.73	-73.39	8	3	3.673	24.1	1	5	5	0	0	10	0.92	5.43478	5.43478	0	0	10.8696	1.39967	0.30103	9	4	0	13
1769	3	CURI	-39.73	-73.39	8	3	2.443	21.6	1	5	5	0	0	10	0.92	5.43478	5.43478	0	0	10.8696	1.35411	0.30103	9	4	0	13
1770	3	CURI	-39.73	-73.39	8	3	2.324	20.9	1	5	5	0	0	10	0.92	5.43478	5.43478	0	0	10.8696	1.34044	0.30103	9	4	0	13
1771	3	CURI	-39.73	-73.39	8	2	0.671	13.2	0	5	5	0	0	10	0.92	5.43478	5.43478	0	0	10.8696	1.15229	0	9	4	0	13
1772	3	CURI	-39.73	-73.39	8	1	0.483	12.3	1	5	5	0	0	10	0.92	5.43478	5.43478	0	0	10.8696	1.12385	0.30103	9	4	0	13
1773	4	CURI	-39.73	-73.39	8	3	4.036	24	2	5	5	0	0	10	0.92	5.43478	5.43478	0	0	10.8696	1.39794	0.477121	9	4	0	13
1774	4	CURI	-39.73	-73.39	8	3	2.504	21.1	3	5	5	0	0	10	0.92	5.43478	5.43478	0	0	10.8696	1.34439	0.60206	9	4	0	13
1775	4	CURI	-39.73	-73.39	8	2	1.78	16.3	1	5	5	0	0	10	0.92	5.43478	5.43478	0	0	10.8696	1.23805	0.30103	9	4	0	13
1776	4	CURI	-39.73	-73.39	8	3	2.503	20.5	2	5	5	0	0	10	0.92	5.43478	5.43478	0	0	10.8696	1.33244	0.477121	9	4	0	13
1777	4	CURI	-39.73	-73.39	8	2	0.768	14.4	0	5	5	0	0	10	0.92	5.43478	5.43478	0	0	10.8696	1.18752	0	9	4	0	13
1778	4	CURI	-39.73	-73.39	8	1	0.775	14.6	4	5	5	0	0	10	0.92	5.43478	5.43478	0	0	10.8696	1.19312	0.69897	9	4	0	13
1779	4	CURI	-39.73	-73.39	8	2	0.513	12.7	0	5	5	0	0	10	0.92	5.43478	5.43478	0	0	10.8696	1.13672	0	9	4	0	13
1780	4	CURI	-39.73	-73.39	8	2	0.233	11.3	0	5	5	0	0	10	0.92	5.43478	5.43478	0	0	10.8696	1.08991	0	9	4	0	13

## Sheet: Column explanation
	Column	Explanation	ID
	Number	number of molecrabs collected	1-1780
	Transect	perpendicular transects of the beach	1, 2, 3 , 4
	Sites	four beaches sampled	Calfuco, Chaihuín, Cheuque, Curiñanco
	LAT	latitude for each beach
	LON	longitude for each beach
	season	four seasons sampled	1= summer, 2= autumm, 3= winter, 4= spring
	Sex	sex for each molecrab	1= male, 2= female, 3= gravid female
	Weight(gr)	weight of molecrab
	Size (mm)	cephalotoraxic length for each molecrab
	N° P. altmani	number of Profilicollis altmani
	Lado	abundance of seagull Larus dominicanus
	Lamo	abundance of seagull Leucopheus modestus
	Lepi	abundance of seagull Leucopheus pipixcan
	Macu	abundance of seagull Chroicocephalus maculipennis
	abuaves	total abundance of seagulls
	area (km2)	area covered by seagulls
	Ladoden	density of L. dominicanus
	Lamoden	densitity of L. modestus
	Lepiden	density of L. pipixcan
	Macuden	density of C. maculipennis
	densave	total density of seagulls
	logsize	log of molecrabs size
	logalt	log of abundance of P. altmani
	peop	number of persons walking by the beach during sample time
	dogs	number of dogs walking by the beach during sampled time
	cow	number of cows walking by the beach during sampled time
	total	total antropogenic (peop, dogs, cow) during sampled time
